# Supplementary material for: Dynamic metabolic models in context: biomass backtracking
Source: Royal Society of Chemistry journal article supplement (doi:10.1039/c5ib00050e), 2015-07-08
Supplement: c5ib00050e1.zip [file SupplementaryTable1_ModelsOverview.xls]

## Sheet: Sheet1
Bsubti
					Harwood, C. R., and S. M. Cutting. 1990. Chemically defined growth media and supplements, p. 548. In C. R. Harwood and S. M. Cutting (ed.), Molecular biological methods for Bacillus. Wiley, Chichester, United Kingdom.
H2O	EX_cpd00001(e)				http://subtiwiki.uni-goettingen.de/wiki/index.php/M9_minimal_medium
Fe2+	EX_cpd10515(e)
H+	EX_cpd00067(e)				42.5 g Na2HPO4.2H2O (Merck)	:Orthophosphate	Sodium
Copper2	EX_cpd00058(e)				15 g KH2PO4 (Merck)	:Orthophosphate	Potassium
Triphosphate	EX_cpd00421(e)				5.0 g NH4Cl (Merck)	NH3
Molybdate	EX_cpd11574(e)				2.5 g NaCl (Merck)	Sodium
Hg2+	EX_cpd00531(e)				100 mg MnCl2.4H2O (Merck)	Magnesium
Biomass	EX_cpd11416_c				170 mg ZnCl2 (Sigma)	Zinc
Fe3+	EX_cpd10516(e)				43 mg CuCl2.2H2O (Merck)	Copper2
Nitrate	EX_cpd00209(e)				60 mg CoCl2.6H2O (Merck)	Cobalt
Sodium	EX_cpd00971(e)				60 mg Na2MoO4.2H2O (Aldrich)	Molybdate
Calcium	EX_cpd00063(e)				1.47 g CaCl2.2H2O (Merck)	Calcium
Sulfate	EX_cpd00048(e)				24.6 g MgSO4.7H2O (Merck)	Magnesium	Sulfate
Vitamin_B12	EX_cpd03424(e)				1.35 g FeCl3.6H2O (Sigma)	Fe3+
Nitrite	EX_cpd00075(e)
NH3	EX_cpd00013(e)
Nickel	EX_cpd00244(e)
Magnesium	EX_cpd00254(e)
Zinc	EX_cpd00034(e)
Cobalt	EX_cpd00149(e)
CO2	EX_cpd00011(e)
Potassium	EX_cpd00205(e)
Lead_Pb	EX_cpd04097(e)
Orthophosphate	EX_cpd00009(e)
Oxygen	EX_cpd00007(e)
D-Glucose	EX_cpd00027(e)		500 g glucose (Merck)
Citrate	EX_cpd00137(e)		2.10 g citric acid.H2O (Sigma)
Human Recon2v03
'EX_ca2(e)'	'calcium(2+) <=> '
'EX_cl(e)'	' <=> Chloride '
'EX_co(e)'	'carbon monoxide <=> '
'EX_co2(e)'	'carbon dioxide <=> '
'EX_fe2(e)'	'Fe2+ <=> '
'EX_fe3(e)'	'Fe3+ <=> '
'EX_hco3(e)'	'Bicarbonate <=> '
'EX_h2o2(e)'	'Hydrogen peroxide <=> '
'EX_i(e)'	'iodide <=> '
'EX_k(e)'	'potassium <=> '
'EX_na1(e)'	' <=> Sodium '
'EX_nh4(e)'	'Ammonium <=> '
'EX_no(e)'	'Nitric oxide <=> '
'EX_o2(e)'	' <=> O2 '
'EX_sel(e)'	'selenate <=> '
'EX_so4(e)'	'sulfate <=> '
'EX_tsul(e)'	'thiosulfate(2-) <=> '
'EX_tcynt(e)'	'thiocyanate <=> '
'EX_no2(e)'	'Nitrite <=> '
'EX_so3(e)'	'Sulfite <=> '
'EX_ppi(e)'	'Diphosphate <=> '
'EX_HC02172(e)'	'Zinc <=> '
'EX_oh1(e)'	'hydroxide ion <=> '
'EX_glc(e)'	'D-glucose <=> '

## Sheet: Sheet2
			'ammonium exchange'	-5.58866		'D-glucose exchange'	-7.59059		'carbon dioxide exchange'	3.35019		'oxygen exchange'	-2.90889		'formate exchange'	0.065211
			'Ammonia exchange'	-10.6374		'D Glucose exchange'	-9.07075		'CO2 exchange'	13.6867		'O2 exchange'	-11.8467		'Acetate exchange'	0.427079	'L methionine S oxide diffusion extracellular '	0.153923
			'Ammonia exchange'	-10		'D-Glucose exchange'	-12.0572		'CO2 exchange'	52.1033		'O2 exchange'	-9.8		'Fumarate exchange'	0.321579	'L-Glutamate exchange'	3.46341	'Glycerol exchange'	-0.1	'carbonic acid exchange'	-38.6889
			'EX cpd00013 e'	-5.87841	NH3	'EX cpd00027 e'	-6.50514	D-Glucose	'EX cpd00011 e'	6.907	CO2				'EX cpd00137 e'	-1.08976	Citrate	'EX cpd00040 e'	1.37783	Glyoxylate
			'Sink needed to allow 4 hydroxy benzoate to leave system'	0.000223					'EX cpd00009 e'	34.7222	Orthophosphate	'EX cpd00079 e'	5.54079	'D-Glucose_6-phosphate'
			'Sink needed to allow 4 hydroxy 5 methyl 3 2H furanone to leave system'	0.000446		'Fe3+ exchange'	-0.001498					'EX cpd00009 e'	30.8242	'Orthophosphate'
									'EX cpd00067 e'	-95.4199	H+	'EX cpd00137 e'	-1.08976	'Citrate'
			'Calcium exchange'	-0.004737					'EX cpd00421 e'	-6.73502	Triphosphate	'EX cpd00067 e'	-84.939	'H+'
'H+ exchange'	62.0091		'Chloride exchange'	-0.004737					'EX cpd10516 e'	-0.003209	Fe3+	'EX cpd00421 e'	-12.4572	'Triphosphate'
									'EX cpd00209 e'	-2.16748	Nitrate	'EX cpd11416 c'	1	'Biomass'		Ammonia	CO2	O2	Additional C sources
'phosphate exchange'	77.2927		'Co2 exchange'	-0.003158					'EX cpd00063 e'	-0.002983	Calcium	'EX cpd10516 e'	-0.003209	'Fe3+'		-5.58866	3.35019	-2.90889	Formate (0.065)
'sulphate exchange'	-0.0773		'Cu2 exchange'	-0.003158		'H2O exchange'	-10					'EX cpd00209 e'	-1.51399	'Nitrate'		-10.6374	13.6867	-11.8467	Acetate (0.427), L methionine S oxide (0.154)
'water exchange'	-57.929		'Fe2 exchange'	-0.014658		'H+ exchange'	36.3057		'EX cpd00048 e'	-0.17044	Sulfate	'EX cpd00063 e'	-0.002983	'Calcium'		-10	52.1033	-9.8	Fumarate (0.322), L-Glutamate (3.463), Glycerol (-0.100), carbonic acid (-38.689)
'growth'	1											'EX cpd00027 e'	-11.6305	'D-Glucose'		-5.87841	6.907	0	Citrate (-1.090), Glyoxylate (1.378)
'Fluxmeasure'	709.654		'H exchange'	16.8695								'EX cpd00048 e'	-0.17044	'Sulfate'
			'K exchange'	-0.1776		'Phosphate exchange'	84.5927		'EX cpd00254 e'	-0.09474	Magnesium	'EX cpd00029 e'	0.0958635	'Acetate'
			'Mg exchange'	-0.007895		'Sulfate exchange'	-0.0645					'EX cpd00040 e'	0.000206831	'Glyoxylate'
			'Mn2 exchange'	-0.003158		'biomass composition for Mycobacterium tuberculosis (v 0.1) - 60 atp'	1		'EX cpd00205 e'	-0.6576	Potassium	'EX cpd00013 e'	-6.53191	'NH3'
			'Molybdate exchange'	-0.003158		'Fluxmeasure'	962.927		'Fluxmeasure'	504.657		'EX cpd00254 e'	-0.09474	'Magnesium'
												'EX cpd00011 e'	6.97763	'CO2'
												'EX cpd00205 e'	-0.6576	'Potassium'
			'Phosphate exchange'	40.2056								'Fluxmeasure'	496.345
			'Sulfate exchange'	-0.096327
			'Zinc exchange'	-0.003158
			'E coli biomass objective function iCA1273 core with 5981 GAM estimate'	1
			'Fluxmeasure'	642.062
Hynne single result Biomass
4.62524	AMP
-68.4053	ATP
63.7801	ADP
4.88863	NAD
-4.88863	NADH
0	GlcX
0	Glc
0	EtOH
0	EtOHX
0	GlycX
0	ACAX
0	BPG
0	FBP
-3.27576	G6P
-0.808331	F6P
-0.10375	GAP
1.28085	DHAP
-0.5286	PEP
-6.59636	Pyr
-0.124306	ACA
-1.28719	Glyc
LUMPED MODEL
'13dpg[c]'	's_0075'	'C00236'	'C3H8O10P2'	'1,3-bisphospho-D-glycerate'		'glc-D[c]'	's_0563'	'C00031'	'D-glucose'	'C6H12O6'
'2pg[c]'	's_0188'	'C00631'	'C3H7O7P'	'2-phospho-D-glyceric acid'		'fdp[c]'	's_0555'	'C00354'	'D-fructose 1,6-bisphosphate'	'C6H14O12P2'
'3pg[c]'	's_0260'	'C00197'	'C3H7O7P'	'3-phosphoglycerate'		'g3p[c]'	's_0764'	'C00661'	'glyceraldehyde 3-phosphate'	'C3H7O6P'
'fdp[c]'	's_0555'	'C00354'	'C6H14O12P2'	'D-fructose 1,6-bisphosphate'		'dhap[c]'	's_0629'	'C00111'	'dihydroxyacetone phosphate'	'C3H7O6P'
'f6p[c]'		'C00085'	'C6H13O9P'	'D-fructose 6-phosphate'		'2pg[c]+3pg[c]'	's_0188','s_0260'	'C00631','C00197'	'phospoglycerate pool'	'C3H7O7P','C3H7O7P'
'glc-D[c]'	's_0563'	'C00031'	'C6H12O6'	'D-glucose'		'pyr[c]'	's_1399'	'C00022'	'pyruvate'	'C3H4O3'
'g6p[c]'	's_0568'	'C00092'	'C6H13O9P'	'D-glucose 6-phosphate'		'adp[c]'	's_0394'	'C00008'	'ADP'	'C10H15N5O10P2'
'g3p[c]'	's_0764'	'C00661'	'C3H7O6P'	'glyceraldehyde 3-phosphate'		'atp[c]'	's_0434'	'C00002'	'ATP'	'C10H16N5O13P3'
'dhap[c]'	's_0629'	'C00111'	'C3H7O6P'	'dihydroxyacetone phosphate'		'nad[c]'	's_1198'	'C00003'	'NAD'	'C21H28N7O14P2'
'pep[c]'	's_1360'	'C00074'	'C3H5O6P'	'phosphoenolpyruvate'		'nadh[c]'	's_1203'	'C00004'	'NADH'	'C21H29N7O14P2'
'pyr[c]'	's_1399'	'C00022'	'C3H4O3'	'pyruvate'
'adp[c]'	's_0394'	'C00008'	'C10H15N5O10P2'	'ADP'
'atp[c]'	's_0434'	'C00002'	'C10H16N5O13P3'	'ATP'
'nad[c]'	's_1198'	'C00003'	'C21H28N7O14P2'	'NAD'
'nadh[c]'	's_1203'	'C00004'	'C21H29N7O14P2'	'NADH'
'FBP'	'r_0449'	[]				'LR1'	'HEX1/PGI/PFK/FBP'	'r_0534','r_0467','r_0886','r_0449'	'R00332','R02003','R01377',[]	'upper glycolysis'
'FBA'	'r_0450'	'R00519'				'FBA'	'FBA'	'r_0450'	'R00519'	'fructose-bisphosphate aldolase'
'HEX1'	'r_0534'	'R00332'				'TPI'	'TPI'	'r_1054'	'R02016'	'triose-phosphate isomerase'
'PGI'	'r_0467'	'R02003'				'LR2'	'GAPD/PGK'	'r_0486','r_0892'	'R00115','R00756'	'lower glycolysis start'
'GAPD'	'r_0486'	'R00115'				'LR3'	'ENO/PYK'	'r_0366','r_0962'	'R01009',[]	'lower glycolysis pyr production'
'PFK'	'r_0886'	'R01377'
'PGK'	'r_0892'	'R00756'
'PGM'	'r_0893'	'R01843'
'ENO'	'r_0366'	'R01009'
'PYK'	'r_0962'	[]
'TPI'	'r_1054'	'R02016'
	'HEX1/PGI/PFK/FBP'	'PFK/FBA'	'TPI'	'GAPD/PGK'	'ENO/PYK'
'glc-D[c]'	-1	0	0	0	0
'fdp[c]'	1	-1	0	0	0
'g3p[c]'	0	1	1	-1	0
'dhap[c]'	0	1	-1	0	0
'2pg[c]+3pg[c]'	0	0	0	1	-1
'pyr[c]'	0	0	0	0	1
'adp[c]'	1	1	0	-1	-1
'atp[c]'	-1	-1	0	1	1
'nad[c]'	0	0	0	-1	0
'nadh[c]'	0	0	0	1	0

## Sheet: Sheet3
Mol weights of biomass compounds
	Cellular content %(w/w)	Calculated Cellular content %(w/w)	Average mass g/mol (weighted with mmol/gDW)	Content %(mol/mol)	mmol/gDW	Calculated % g/gDW
Protein	45		108.638		3.685	40.0329	57.0469						66.21	34	1.94735
Free amino acids	1.1		assumed as above				0		100.01				47.78	34	1.40529
Glycogen	8.4		162		0.52	8.424	8.05003						26.42	6	4.40333
Trehalose	0.8		342.3		0.02	0.6846	0.309617						25.35	6	4.225
Mannan	13.1		162		0.81	13.122	12.5395
Other carbohydrates	18.4		162		1.14	18.468	17.6482
RNA	6.3		338.41		0.219	7.41118	3.3903
DNA	0.4		332.32		0.012	0.398784	0.18577
Lipid	2.9		573.834		0.0536	3.07575	0.829773
Ash	5						100
Sum	101.4					91.6172
	Schulze, 1995
AA pool
Monomer	Calculated Cellular content %(w/w)		Average mass g/mol	Content %(mol/mol)	mmol/gDW
ALA			71.0779		0.459
ARG			156.186		0.161
ASN			114.103		0.102
ASP			115.087		0.297
CYS			103.143		0.007			DNA Deoxyribonucleotide Pool	RNA Ribonucleotide Pool	Lipid Pool	Proteinogenic AA Pool	mannan [cytoplasm]	trehalose [cytoplasm]	glycogen [cytoplasm]	(1->3)-beta-D-glucan [cytoplasm]
GLN			128.129		0.105			DNA	RNA	Lipid	Protein	Mannan	Trehalose	Glycogen	Other carbohydrates
GLU			129.114		0.302			0.012	0.219	0.0536	3.685	0.81	0.02	0.52	1.14
GLY			57.0513		0.29
HIS			137.139		0.066
ILE			113.158		0.193
LEU			113.158		0.296
LYS			128.172		0.286
MET			131.196		0.051
PHE			147.174		0.134
PRO			97.1152		0.165
SER			87.0773		0.185
THR			101.104		0.191
TRP			186.21		0.028
TYR			163.173		0.102
VAL			99.1311		0.265
					Oura 1972, Bruinenberg 1983
RNA pool
AMP			347.2		0.051
CMP			323.2		0.05
GMP			363.2		0.051
UMP			324.2		0.067
					Oura 1972, Bruinenberg 1983
DNA Pool
	Content %(w/w) DNA	Cellular content %(w/w) cell	MW (g/mol)	Content %(mol/mol)	mmol/gDW
dAMP	0.313		349.239	0.298	0.0036
dCMP	0.187		307.199	0.202	0.0024
dGMP	0.211		347.224	0.202	0.0024
dTMP	0.289		322.211	0.298	0.0036
					Vaughan-Martini, 1993
Carbohydrates
	Cellular content %(w/w) cell	Cellular content %(w/w) cell	MW (g/mol)		mmol/gDW
Glycogen	8.4	8.4	162		0.52
Trehalose	0.8	0.8	342.3		0.02
Mannan	13.1	13.1	162		0.81
Other (Glucan)	18.4	18.4	162		1.14
					Schulze, 1995
Lipids
Lipid	Content %(w/w Lipid)	Cellular content %(w/w) cell	MW (g/mol)		mmol/gDW
Triacylglycerol	20	0.58	867.22		0.0066
Monoacylglycerol (artifact)	8	0.232	348.41		0.0066
Sterols (ergosterol)	1	0.029	396.66		0.007
Sterol esters (zymestrol)	2	0.058	384		0.015
Phospholipids	54	1.566	771.616		0.0184
Phospholipids	Content %(w/w) Phospholipids	Cellular content %(w/w) cell	Avg MW (g/mol)		mmol/gDW
PA	2.5	0.03915	672.57		0.0006
PINS	28.7	0.449442	850.71		0.0053
PS	8	0.12528	760.66		0.0017
PE	20.5	0.32103	716.65		0.0048
PC	29.2	0.457272	758.73		0.006
	88.9	1.39217

## Sheet: Sheet4
YEAST
3-phosphoglycerate [cytoplasm	-1.5286	3-phospho-hydroxypyruvate
D-fructose 6-phosphate [cytoplasm]	0.80833	D-mannose 6-phosphate
	0.10859	D-erythrose 4-phosphate [cytoplasm] + D-xylulose 5-phosphate
D-glucose 6-phosphate [cytoplasm]	0.000234	alpha,alpha-trehalose 6-phosphate
	0.0050909	6-O-phosphono-D-glucono-1,5-lactone
	2.4448e-05	1D-myo-inositol 1-phosphate
	0.028115	D-glucose 1-phosphate
glyceraldehyde 3-phosphate [cytoplasm]	0.0015571	-xylulose 5-phosphate [cytoplasm] + ribose-5-phosphate
	0.0010859	D-erythrose 4-phosphate [cytoplasm] + D-xylulose 5-phosphate [cytoplasm]
	0.000284	L-tryptophan
dihydroxyacetone phosphate [cytoplasm]	6.331e-05	glycerol 3-phosphate
	0.0015571	sedoheptulose 1,7-bisphosphate
hosphoenolpyruvate [cytoplasm]	-0.002643	'citrate transport'
	0.002643	'3-phosphoshikimic acid [cytoplasm] + phosphoenolpyruvate [cytoplasm] <=> 5-O-(1-carboxyvinyl)-3-phosphoshikimic acid [cytoplasm] + phosphate [cytoplasm] '
pyruvate [cytoplasm]	0.000284	chorismate [cytoplasm] + L-glutamine [cytoplasm] <=> anthranilate [cytoplasm] + H+ [cytoplasm] + L-glutamate [cytoplasm] + pyruvate [cytoplasm]	anthranilate synthase
	0.021244	ATP [cytoplasm] + bicarbonate [cytoplasm] + pyruvate [cytoplasm] <=> ADP [cytoplasm] + H+ [cytoplasm] + oxaloacetate [cytoplasm] + phosphate [cytoplasm]	pyruvate carboxylase	'malate dehydrogenase, cytoplasmic'	'oxoglutarate/malate exchange'	-->TCA	'fumarase' 0.092951 -1000 1000 'fumarate [mitochondrion] + H2O [mitochondrion] <=> (S)-malate [mitochondrion] ' false 'malate dehydrogenase' 0.11634 -1000 1000 '(S)-malate [mitochondrion] + NAD [mitochondrion] <=> H+ [mitochondrion] + NADH [mitochondrion] + oxaloacetate [mitochondrion] ' false
	0.0012431	H+ [cytoplasm] + pyruvate [cytoplasm] <=> acetaldehyde [cytoplasm] + carbon dioxide [cytoplasm]	pyruvate decarboxylase
	0.12174	H+ [cytoplasm] + pyruvate [cytoplasm] <=> H+ [mitochondrion] + pyruvate [mitochondrion]	pyruvate transport
	-0.004588	3-(4-hydroxyphenyl)pyruvate [cytoplasm] + L-alanine [cytoplasm] <=> L-tyrosine [cytoplasm] + pyruvate [cytoplasm]	tyrosine transaminase
ECOLI
3-Phospho-D-glycerate	1.7182	3-Phosphohydroxypyruvate
'D-Fructose 6-phosphate'	1.3169	fructose 6-phosphate aldolase
	0.76504	'transketolase'
'D-Glucose 6-phosphate'	4.0312	6-phospho-D-glucono-1,5-lactone
	10	D-glucose transport via PEP:Pyr PTS (periplasm)' 10
Glyceraldehyde 3-phosphate	0.002835		1-deoxy-D-xylulose 5-phosphate synthase
	1.3169		fructose 6-phosphate aldolase
	1.1464		transketolase
	0.76504		transketolase
	0.056843		tryptophan synthase (indoleglycerol phosphate)
Dihydroxyacetone phosphate	1.3169	Dihydroxyacetone + Phosphoenolpyruvate -> Dihydroxyacetone phosphate + Pyruvate	Dihydroxyacetone phosphotransferase
	1.1464	Sedoheptulose 1,7-bisphosphate D-glyceraldehyde-3-phosphate-lyase
Phosphoenolpyruvate	10	'D-glucose transport via PEP:Pyr PTS (periplasm)' 10 0 1000 'Phosphoenolpyruvate + D-Glucose -> D-Glucose 6-phosphate + Pyruvate '
	2.9594	Oxaloacetate
	1.3169	Dihydroxyacetone phosphotransferase
	0.38112	5-O-(1-Carboxyvinyl)-3-phosphoshikimate
Pyruvate	8.3687	Acetyl-CoA
		+ Chorismate, butanoate, acetolactate, Glutamate, cysteine,tryptophane
MTB
3-Phospho-D-glycerate	14.1935	3-Phosphohydroxypyruvate	2-Oxoglutarate	L-Glutamate + H2O + Nicotinamide adenine dinucleotide
D-Fructose 6-phosphate	0.0015909*100	D-Mannose 6-phosphate
	0.0031706*100	D-Glucosamine 6-phosphate + L-Glutamate
D-Glucose	0.14163*100	D-glucose transport via ABC system	ATP + D-Glucose + H2O -> ADP + D-Glucose + H+ + Phosphate
D-Glucose 6-phosphate	0.0011822*100	D-Glucose 1-phosphate
Glyceraldehyde 3-phosphate		tryptophane, 1-deoxy-D-xylulose 5-phosphate,PPP
Dihydroxyacetone phosphate	-0.101	Glycerol 3-phosphate
Phosphoenolpyruvate		Oxaloacetate	phosphoenolpyruvate carboxykinase
		UDP-N-acetyl-D-glucosamine,skimatate (cons)
Pyruvate	0.082535*100	Acetyl-CoA
		+ many other biosynthetic processes (acetolactzate,hydroxybutanoate, glutamate/alanine, chorismate, cysteine
NADH regeneration for free	3-Phosphohydroxypyruvate + L-Glutamate -> 2-Oxoglutarate + O-Phospho-L-serine '	'H2O + O-Phospho-L-serine -> Phosphate + L-Serine '
		L-Glutamate + H2O + Nicotinamide adenine dinucleotide <=> 2-Oxoglutarate + H+ + Nicotinamide adenine dinucleotide - reduced + Ammonium '
BSUBTI
3-Phospho-D-glycerate'	1.792	D-Glycerate
D-Fructose_6-phosphate	0.0017069*100	-Erythrose_4-phosphate + D-Xylulose_5-phosphate
	0.0033112*100	D-Glucosamine_6-phosphate + L-Glutamate
	0.052006*100	Beta-D-Glucose_6-phosphate	Beta-D-Glucose_1-phosphate	'Orthophosphate + H+ + Maltose <=> D-Glucose + beta-D-Glucose_1-phosphate '
D-Glucose		Maltose	D-Glucose + beta-D-Glucose_1-phosphate
	0.74545
'hexokinase (D-glucose:ATP)'	0.00112727	0	-1	'ATP [cytoplasm] + D-glucose [cytoplasm] -> ADP [cytoplasm] + D-glucose 6-phosphate [cytoplasm] + H+ [cytoplasm] '						1
'nucleoside diphosphate kinase'	0.001	0	-1	'ATP [cytoplasm] + GDP [cytoplasm] -> ADP [cytoplasm] + GTP [cytoplasm] '						0
'nucleoside diphosphate kinase'	-8.26116659413185e-35	0	-1	'ATP [cytoplasm] + IDP [cytoplasm] -> ADP [cytoplasm] + ITP [cytoplasm] '						0
'nucleoside diphosphate kinase'	4.22202234834624e-40	-1000	-1	'ATP [cytoplasm] + dUDP [cytoplasm] <=> ADP [cytoplasm] + dUTP [cytoplasm] '						0
'phosphofructokinase'	0.000127273	0	-1	'ATP [cytoplasm] + D-fructose 6-phosphate [cytoplasm] -> ADP [cytoplasm] + D-fructose 1,6-bisphosphate [cytoplasm] + H+ [cytoplasm] '						1
'phosphofructokinase (s7p)'	-5.38235595281917e-20	0	-1	'ATP [cytoplasm] + sedoheptulose 7-phosphate [cytoplasm] -> ADP [cytoplasm] + H+ [cytoplasm] + sedoheptulose 1,7-bisphosphate [cytoplasm] '						0
'ATP deamination'	8.26116659413185e-35	0	-1	'ATP [cytoplasm] + H+ [cytoplasm] + H2O [cytoplasm] -> ammonium [cytoplasm] + ITP [cytoplasm] '						0
'ATP transport, cytoplasm-ER membrane'	1.11405418273479e-34	-1000	-1	'ATP [cytoplasm] <=> ATP [endoplasmic reticulum membrane] '						0
'ATP transport, cytoplasm-lipid particle'	8.59666442481297e-36	-1000	-1	'ATP [cytoplasm] <=> ATP [lipid particle] '						0
'phosphoglycerate kinase'	0.000254545	-1000	1	'1,3-bisphospho-D-glycerate [cytoplasm] + ADP [cytoplasm] <=> 3-phosphoglycerate [cytoplasm] + ATP [cytoplasm] '						1
'pyruvate kinase'	0.000254545	0	1	'ADP [cytoplasm] + H+ [cytoplasm] + phosphoenolpyruvate [cytoplasm] -> ATP [cytoplasm] + pyruvate [cytoplasm] '						1
'ADP/ATP transporter'	0.00174545	-1000	1	'ADP [cytoplasm] + ATP [mitochondrion] + H+ [cytoplasm] <=> ADP [mitochondrion] + ATP [cytoplasm] + H+ [mitochondrion] '						1
	-1.12727	-1.12727	0
	-1	0	-1
	8.26117e-32	0	8.26117e-32
	-4.22202e-37	0	-4.22202e-37
	-0.127273	-0.127273	0
	5.38236e-17	0	5.38236e-17
	-8.26117e-32	0	-8.26117e-32
	-1.11405e-31	0	-1.11405e-31
	-8.59666e-33	0	-8.59666e-33
	0.254545	0.254545	0
	0.254545	0.254545	0
	1.74545	0	0	1.74545
	2.88658e-15	-0.745455	-1	1.74545
	-10.7088
'acetyl-CoA carboxylase, reaction'	0.00789504	0	-1	'acetyl-CoA [cytoplasm] + ATP [cytoplasm] + bicarbonate [cytoplasm] -> ADP [cytoplasm] + H+ [cytoplasm] + malonyl-CoA [cytoplasm] + phosphate [cytoplasm] '						0
'acetyl-CoA synthetase'	0.00900507	0	-1	'acetate [cytoplasm] + ATP [cytoplasm] + coenzyme A [cytoplasm] -> acetyl-CoA [cytoplasm] + AMP [cytoplasm] + diphosphate [cytoplasm] '						0
'adenosine kinase'	0.00111468	0	-1	'adenosine [cytoplasm] + ATP [cytoplasm] -> ADP [cytoplasm] + AMP [cytoplasm] + H+ [cytoplasm] '						0
'adenylate kinase'	0.0100736	0	-1	'AMP [cytoplasm] + ATP [cytoplasm] -> 2 ADP [cytoplasm] '						1
'CTP synthase (glutamine)'	1.94560704707060e-21	0	-1	'ATP [cytoplasm] + H2O [cytoplasm] + L-glutamine [cytoplasm] + UTP [cytoplasm] -> ADP [cytoplasm] + CTP [cytoplasm] + 2 H+ [cytoplasm] + L-glutamate [cytoplasm] + phosphate [cytoplasm] '						0
'dihydroxyacetone kinase'	0.000168452	0	-1	'ATP [cytoplasm] + glycerone [cytoplasm] -> ADP [cytoplasm] + dihydroxyacetone phosphate [cytoplasm] + H+ [cytoplasm] '						0
'formate-tetrahydrofolate ligase'	0.000493915	-1000	-1	'ATP [cytoplasm] + formate [cytoplasm] + THF [cytoplasm] <=> 10-formyl-THF [cytoplasm] + ADP [cytoplasm] + phosphate [cytoplasm] '						0
'hexokinase (D-glucose:ATP)'	0.011632	0	-1	'ATP [cytoplasm] + D-glucose [cytoplasm] -> ADP [cytoplasm] + D-glucose 6-phosphate [cytoplasm] + H+ [cytoplasm] '						1
'methionine adenosyltransferase'	0.00111468	0	-1	'ATP [cytoplasm] + H2O [cytoplasm] + L-methionine [cytoplasm] -> diphosphate [cytoplasm] + phosphate [cytoplasm] + S-adenosyl-L-methionine [cytoplasm] '						0
'mevalonate kinase (atp)'	0.0029774	0	-1	'(R)-mevalonate [cytoplasm] + ATP [cytoplasm] -> (R)-5-phosphomevalonic acid [cytoplasm] + ADP [cytoplasm] + H+ [cytoplasm] '						0
'mevalonate pyrophoshate decarboxylase'	0.0029774	0	-1	'(R)-5-diphosphomevalonic acid [cytoplasm] + ATP [cytoplasm] -> ADP [cytoplasm] + carbon dioxide [cytoplasm] + isopentenyl diphosphate [cytoplasm] + phosphate [cytoplasm] '						0
'NADH kinase'	-9.08561975527438e-19	0	-1	'ATP [cytoplasm] + NADH [cytoplasm] -> ADP [cytoplasm] + H+ [cytoplasm] + NADPH [cytoplasm] '						0
'nucleoside diphosphate kinase'	0.000470342	0	-1	'ATP [cytoplasm] + CDP [cytoplasm] -> ADP [cytoplasm] + CTP [cytoplasm] '						0
'nucleoside diphosphate kinase'	3.12155896841495e-05	0	-1	'ATP [cytoplasm] + GDP [cytoplasm] -> ADP [cytoplasm] + GTP [cytoplasm] '						0
'nucleoside diphosphate kinase'	-5.81860943656016e-37	-1000	-1	'ATP [cytoplasm] + dIDP [cytoplasm] <=> ADP [cytoplasm] + dITP [cytoplasm] '						0
'nucleoside diphosphate kinase'	1.94560704707059e-21	-1000	-1	'ATP [cytoplasm] + dUDP [cytoplasm] <=> ADP [cytoplasm] + dUTP [cytoplasm] '						0
'phosphofructokinase'	0.00439943	0	-1	'ATP [cytoplasm] + D-fructose 6-phosphate [cytoplasm] -> ADP [cytoplasm] + D-fructose 1,6-bisphosphate [cytoplasm] + H+ [cytoplasm] '						1
'phosphofructokinase (s7p)'	0.00351213	0	-1	'ATP [cytoplasm] + sedoheptulose 7-phosphate [cytoplasm] -> ADP [cytoplasm] + H+ [cytoplasm] + sedoheptulose 1,7-bisphosphate [cytoplasm] '						0
'phosphoglycerate kinase'	0.0188766	-1000	1	'1,3-bisphospho-D-glycerate [cytoplasm] + ADP [cytoplasm] <=> 3-phosphoglycerate [cytoplasm] + ATP [cytoplasm] '						1
'phosphomevalonate kinase'	0.0029774	0	-1	'(R)-5-phosphomevalonic acid [cytoplasm] + ATP [cytoplasm] -> (R)-5-diphosphomevalonic acid [cytoplasm] + ADP [cytoplasm] '						0
'pyruvate carboxylase'	-1.60645363157937e-19	0	-1	'ATP [cytoplasm] + bicarbonate [cytoplasm] + pyruvate [cytoplasm] -> ADP [cytoplasm] + H+ [cytoplasm] + oxaloacetate [cytoplasm] + phosphate [cytoplasm] '						0
'pyruvate kinase'	0.0179373	0	1	'ADP [cytoplasm] + H+ [cytoplasm] + phosphoenolpyruvate [cytoplasm] -> ATP [cytoplasm] + pyruvate [cytoplasm] '						1
'uridylate kinase (dUMP)'	1.94560704707059e-21	0	-1	'ATP [cytoplasm] + dUMP [cytoplasm] -> ADP [cytoplasm] + dUDP [cytoplasm] '						0
'ADP/ATP transporter'	0.0224472	-1000	1	'ADP [cytoplasm] + ATP [mitochondrion] + H+ [cytoplasm] <=> ADP [mitochondrion] + ATP [cytoplasm] + H+ [mitochondrion] '						0
'cytidylate kinase (CMP)'	0.000464489	0	-1	'ATP [cytoplasm] + CMP [cytoplasm] -> ADP [cytoplasm] + CDP [cytoplasm] '						0
'deoxyadenylate kinase'	4.51899113994839e-37	-1000	-1	'ATP [cytoplasm] + dAMP [cytoplasm] <=> ADP [cytoplasm] + dADP [cytoplasm] '						0
'deoxyuridine kinase (ATP:deoxyuridine)'	1.94560704707059e-21	0	-1	'2''-deoxyuridine [cytoplasm] + ATP [cytoplasm] -> ADP [cytoplasm] + dUMP [cytoplasm] + H+ [cytoplasm] '						0
'fatty acyl-CoA transport via ABC system (C16:0)'	1.77343046048738e-33	0	-1	'ATP [cytoplasm] + H2O [cytoplasm] + palmitoyl-CoA [cytoplasm] -> ADP [cytoplasm] + H+ [cytoplasm] + palmitoyl-CoA [peroxisome] + phosphate [cytoplasm] '						0
'fatty acyl-CoA transport via ABC system (C18:1)'	-1.81745665070901e-33	0	-1	'ATP [cytoplasm] + H2O [cytoplasm] + oleoyl-CoA [cytoplasm] -> ADP [cytoplasm] + H+ [cytoplasm] + oleoyl-CoA [peroxisome] + phosphate [cytoplasm] '						0
'ATP transport, cytoplasm-ER membrane'	-4.61388003477253e-05	-1000	-1	'ATP [cytoplasm] <=> ATP [endoplasmic reticulum membrane] '						0
'ATP transport, cytoplasm-lipid particle'	-5.09192259078267e-23	-1000	-1	'ATP [cytoplasm] <=> ATP [lipid particle] '						0
'acetyl-CoA carboxylase, reaction'	-7.89504	0	-7.89504
'acetyl-CoA synthetase'	-9.00507	0	-9.00507
'adenosine kinase'	-1.11468	0	-1.11468
'adenylate kinase'	-10.0736	-10.0736	0
'CTP synthase (glutamine)'	-1.94561e-18	0	-1.94561e-18
'dihydroxyacetone kinase'	-0.168452	0	-0.168452
'formate-tetrahydrofolate ligase'	-0.493915	0	-0.493915
'hexokinase (D-glucose:ATP)'	-11.632	-11.632	0
'methionine adenosyltransferase'	-1.11468	0	-1.11468
'mevalonate kinase (atp)'	-2.9774	0	-2.9774
'mevalonate pyrophoshate decarboxylase'	-2.9774	0	-2.9774
'NADH kinase'	9.08562e-16	0	9.08562e-16
'nucleoside diphosphate kinase'	-0.470342	0	-0.470342
'nucleoside diphosphate kinase'	-0.0312156	0	-0.0312156
'nucleoside diphosphate kinase'	5.81861e-34	0	5.81861e-34
'nucleoside diphosphate kinase'	-1.94561e-18	0	-1.94561e-18
'phosphofructokinase'	-4.39943	-4.39943	0
'phosphofructokinase (s7p)'	-3.51213	0	-3.51213
'phosphoglycerate kinase'	18.8766	18.8766	0
'phosphomevalonate kinase'	-2.9774	0	-2.9774
'pyruvate carboxylase'	1.60645e-16	0	1.60645e-16
'pyruvate kinase'	17.9373	17.9373	0
'uridylate kinase (dUMP)'	-1.94561e-18	0	-1.94561e-18
'ADP/ATP transporter'	22.4472	0	0	22.4472
'cytidylate kinase (CMP)'	-0.464489	0	-0.464489
'deoxyadenylate kinase'	-4.51899e-34	0	-4.51899e-34
'deoxyuridine kinase (ATP:deoxyuridine)'	-1.94561e-18	0	-1.94561e-18
'fatty acyl-CoA transport via ABC system (C16:0)'	-1.77343e-30	0	-1.77343e-30
'fatty acyl-CoA transport via ABC system (C18:1)'	1.81746e-30	0	1.81746e-30
'ATP transport, cytoplasm-ER membrane'	0.0461388	0	0.0461388
'ATP transport, cytoplasm-lipid particle'	5.09192e-20	0	5.09192e-20
		10.7088	-33.1561
					M1	M2	M3	M4	M5
'5''-phosphoribosylformyl glycinamidine synthetase'	9.89900000000002e-05	-1	1000	'5''-phosphoribosyl-N-formylglycineamide [cytoplasm] + ATP [cytoplasm] + H2O [cytoplasm] + L-glutamine [cytoplasm] -> 5''-phosphoribosyl-N-formylglycineamidine [cytoplasm] + ADP [cytoplasm] + H+ [cytoplasm] + L-glutamate [cytoplasm] + phosphate [cytoplasm] '	0	0	0	0	0
'acetyl-CoA carboxylase, reaction'	0.000108983	-1	1000	'acetyl-CoA [cytoplasm] + ATP [cytoplasm] + bicarbonate [cytoplasm] -> ADP [cytoplasm] + H+ [cytoplasm] + malonyl-CoA [cytoplasm] + phosphate [cytoplasm] '	0	0	0	0	0
'acetyl-CoA synthetase'	0.000181606	-1	1000	'acetate [cytoplasm] + ATP [cytoplasm] + coenzyme A [cytoplasm] -> acetyl-CoA [cytoplasm] + AMP [cytoplasm] + diphosphate [cytoplasm] '	0	0	0	0	0
'adenosine kinase'	1.53870000000000e-05	-1	1000	'adenosine [cytoplasm] + ATP [cytoplasm] -> ADP [cytoplasm] + AMP [cytoplasm] + H+ [cytoplasm] '	0	0	0	0	0
'adenylate kinase'	0.00462524	-1	1000	'AMP [cytoplasm] + ATP [cytoplasm] -> 2 ADP [cytoplasm] '	0	0	0	0	0
'adenylyl-sulfate kinase'	5.73000000000000e-05	-1	1000	'5''-adenylyl sulfate [cytoplasm] + ATP [cytoplasm] -> 3''-phospho-5''-adenylyl sulfate [cytoplasm] + ADP [cytoplasm] + H+ [cytoplasm] '	0	0	0	0	0
'alanyl-tRNA synthetase'	0.0004588	-1	1000	'ATP [cytoplasm] + L-alanine [cytoplasm] + tRNA(Ala), cytoplasmic [cytoplasm] -> Ala-tRNA(Ala) [cytoplasm] + AMP [cytoplasm] + diphosphate [cytoplasm] '	0	0	0	0	0
'argininosuccinate synthase'	0.0001607	-1	1000	'ATP [cytoplasm] + L-aspartate [cytoplasm] + L-citrulline [cytoplasm] <=> (N(omega)-L-arginino)succinic acid [cytoplasm] + AMP [cytoplasm] + diphosphate [cytoplasm] + H+ [cytoplasm] '	0	0	0	0	0
'arginyl-tRNA synthetase'	0.0001607	-1	1000	'ATP [cytoplasm] + L-arginine [cytoplasm] + tRNA(Arg), cytoplasmic [cytoplasm] -> AMP [cytoplasm] + Arg-tRNA(Arg) [cytoplasm] + diphosphate [cytoplasm] '	0	0	0	0	0
'asparagine synthase (glutamine-hydrolysing)'	0.0001017	-1	1000	'ATP [cytoplasm] + H2O [cytoplasm] + L-aspartate [cytoplasm] + L-glutamine [cytoplasm] -> AMP [cytoplasm] + diphosphate [cytoplasm] + H+ [cytoplasm] + L-asparagine [cytoplasm] + L-glutamate [cytoplasm] '	0	0	0	0	0
'Asparaginyl-tRNA synthetase'	0.0001017	-1	1000	'ATP [cytoplasm] + L-asparagine [cytoplasm] + tRNA(Asn), cytoplasmic [cytoplasm] -> AMP [cytoplasm] + Asn-tRNA(Asn) [cytoplasm] + diphosphate [cytoplasm] '	0	0	0	0	0
'aspartate kinase'	0.0004348	-1	1000	'ATP [cytoplasm] + L-aspartate [cytoplasm] -> 4-phospho-L-aspartate [cytoplasm] + ADP [cytoplasm] '	0	0	0	0	0
'Aspartyl-tRNA synthetase'	0.0002975	-1	1000	'ATP [cytoplasm] + L-aspartate [cytoplasm] + tRNA(Asp), cytoplasmic [cytoplasm] -> AMP [cytoplasm] + Asp-tRNA(Asp) [cytoplasm] + diphosphate [cytoplasm] '	0	0	0	0	0
'ATP phosphoribosyltransferase'	6.63000000000000e-05	-1	1000	'ATP [cytoplasm] + PRPP [cytoplasm] -> 5-phosphoribosyl-ATP [cytoplasm] + diphosphate [cytoplasm] '	0	0	0	0	0
'carbamoyl-phosphate synthase (glutamine-hydrolysing)'	0.0002713	-2	1000	'2 ATP [cytoplasm] + bicarbonate [cytoplasm] + H2O [cytoplasm] + L-glutamine [cytoplasm] -> 2 ADP [cytoplasm] + carbamoyl phosphate [cytoplasm] + 2 H+ [cytoplasm] + L-glutamate [cytoplasm] + phosphate [cytoplasm] '	0	0	0	0	0
'CTP synthase (NH3)'	4.75926000000000e-05	-1	1000	'ammonium [cytoplasm] + ATP [cytoplasm] + UTP [cytoplasm] -> ADP [cytoplasm] + CTP [cytoplasm] + 2 H+ [cytoplasm] + phosphate [cytoplasm] '	0	0	0	0	0
'cysteinyl-tRNA synthetase'	6.60000000000000e-06	-1	1000	'ATP [cytoplasm] + L-cysteine [cytoplasm] + tRNA(Cys), cytoplasmic [cytoplasm] -> AMP [cytoplasm] + Cys-tRNA(Cys) [cytoplasm] + diphosphate [cytoplasm] '	0	0	0	0	0
'deoxyguanylate kinase (dGMP:ATP)'	-2.40000000000000e-06	-1	1000	'ATP [cytoplasm] + dGMP [cytoplasm] <=> ADP [cytoplasm] + dGDP [cytoplasm] '	0	0	0	0	0
'formate-tetrahydrofolate ligase'	-0.000969823	-1	1000	'ATP [cytoplasm] + formate [cytoplasm] + THF [cytoplasm] <=> 10-formyl-THF [cytoplasm] + ADP [cytoplasm] + phosphate [cytoplasm] '	0	0	0	0	0
'glutamate 5-kinase'	0.0001647	-1	1000	'ATP [cytoplasm] + L-glutamate [cytoplasm] -> ADP [cytoplasm] + L-gamma-glutamyl phosphate [cytoplasm] '	0	0	0	0	0
'glutamine synthetase'	0.00082047	-1	1000	'ammonium [cytoplasm] + ATP [cytoplasm] + L-glutamate [cytoplasm] -> ADP [cytoplasm] + H+ [cytoplasm] + L-glutamine [cytoplasm] + phosphate [cytoplasm] '	0	0	0	0	0
'glutaminyl-tRNA synthetase'	0.0001054	-1	1000	'ATP [cytoplasm] + L-glutamine [cytoplasm] + tRNA(Gln), cytoplasmic [cytoplasm] -> AMP [cytoplasm] + diphosphate [cytoplasm] + Gln-tRNA(Gln) [cytoplasm] '	0	0	0	0	0
'glutamyl-tRNA synthetase'	0.0003018	-1	1000	'ATP [cytoplasm] + L-glutamate [cytoplasm] + tRNA(Glu), cytoplasmic [cytoplasm] -> AMP [cytoplasm] + diphosphate [cytoplasm] + Glu-tRNA(Glu) [cytoplasm] '	0	0	0	0	0
'glycyl-tRNA synthetase'	0.0002904	-1	1000	'ATP [cytoplasm] + L-glycine [cytoplasm] + tRNA(Gly), cytoplasmic [cytoplasm] -> AMP [cytoplasm] + diphosphate [cytoplasm] + Gly-tRNA(Gly) [cytoplasm] '	0	0	0	0	0
'GMP synthase'	4.93900000000000e-05	-1	1000	'ATP [cytoplasm] + H2O [cytoplasm] + L-glutamine [cytoplasm] + xanthosine-5-phosphate [cytoplasm] -> AMP [cytoplasm] + diphosphate [cytoplasm] + GMP [cytoplasm] + 2 H+ [cytoplasm] + L-glutamate [cytoplasm] '	0	0	0	0	0
'guanylate kinase'	3.39000000000000e-06	-1	1000	'ATP [cytoplasm] + GMP [cytoplasm] -> ADP [cytoplasm] + GDP [cytoplasm] '	0	0	0	0	0
'hexokinase (D-glucose:ATP)'	0.0126058	-1	1000	'ATP [cytoplasm] + D-glucose [cytoplasm] -> ADP [cytoplasm] + D-glucose 6-phosphate [cytoplasm] + H+ [cytoplasm] '	1	1	0	1	1
'histidyl-tRNA synthetase'	6.63000000000000e-05	-1	1000	'ATP [cytoplasm] + L-histidine [cytoplasm] + tRNA(His), cytoplasmic [cytoplasm] -> AMP [cytoplasm] + diphosphate [cytoplasm] + His-tRNA(His) [cytoplasm] '	0	0	0	0	0
'homoserine kinase'	0.0003775	-1	1000	'ATP [cytoplasm] + L-homoserine [cytoplasm] -> ADP [cytoplasm] + H+ [cytoplasm] + O-phospho-L-homoserine [cytoplasm] '	0	0	0	0	0
'isoleucyl-tRNA synthetase'	0.0001927	-1	1000	'ATP [cytoplasm] + L-isoleucine [cytoplasm] + tRNA(Ile), cytoplasmic [cytoplasm] -> AMP [cytoplasm] + diphosphate [cytoplasm] + Ile-tRNA(Ile) [cytoplasm] '	0	0	0	0	0
'leucyl-tRNA synthetase'	0.0002964	-1	1000	'ATP [cytoplasm] + L-leucine [cytoplasm] + tRNA(Leu), cytoplasmic [cytoplasm] -> AMP [cytoplasm] + diphosphate [cytoplasm] + Leu-tRNA(Leu) [cytoplasm] '	0	0	0	0	0
'lysyl-tRNA synthetase'	0.0002862	-1	1000	'ATP [cytoplasm] + L-lysine [cytoplasm] + tRNA(Lys), cytoplasmic [cytoplasm] -> AMP [cytoplasm] + diphosphate [cytoplasm] + Lys-tRNA(Lys) [cytoplasm] '	0	0	0	0	0
'methionine adenosyltransferase'	1.53870000000000e-05	-1	1000	'ATP [cytoplasm] + H2O [cytoplasm] + L-methionine [cytoplasm] -> diphosphate [cytoplasm] + phosphate [cytoplasm] + S-adenosyl-L-methionine [cytoplasm] '	0	0	0	0	0
'methionyl-tRNA synthetase'	5.07000000000000e-05	-1	1000	'ATP [cytoplasm] + L-methionine [cytoplasm] + tRNA(Met), cytoplasmic [cytoplasm] -> AMP [cytoplasm] + diphosphate [cytoplasm] + Met-tRNA(Met) [cytoplasm] '	0	0	0	0	0
'mevalonate pyrophoshate decarboxylase'	4.11000000000000e-05	-1	1000	'(R)-5-diphosphomevalonic acid [cytoplasm] + ATP [cytoplasm] -> ADP [cytoplasm] + carbon dioxide [cytoplasm] + isopentenyl diphosphate [cytoplasm] + phosphate [cytoplasm] '	0	0	0	0	0
'nucleoside diphosphate kinase'	0.000925221	-1	1000	'ATP [cytoplasm] + GDP [cytoplasm] -> ADP [cytoplasm] + GTP [cytoplasm] '	0	0	0	0	0
'nucleoside-diphosphate kinase (ATP:UDP)'	0.0028622	-1	1000	'ATP [cytoplasm] + UDP [cytoplasm] -> ADP [cytoplasm] + UTP [cytoplasm] '	0	0	0	0	0
'phenylalanyl-tRNA synthetase'	0.0001339	-1	1000	'ATP [cytoplasm] + L-phenylalanine [cytoplasm] + tRNA(Phe), cytoplasmic [cytoplasm] -> AMP [cytoplasm] + diphosphate [cytoplasm] + Phe-tRNA(Phe) [cytoplasm] '	0	0	0	0	0
'phopshoribosylaminoimidazole synthetase'	9.89900000000002e-05	-1	1000	'5''-phosphoribosyl-N-formylglycineamidine [cytoplasm] + ATP [cytoplasm] -> 5''-phosphoribosyl-5-aminoimidazole [cytoplasm] + ADP [cytoplasm] + 2 H+ [cytoplasm] + phosphate [cytoplasm] '	0	0	0	0	0
'phosphofructokinase'	0.00834247	-1	1000	'ATP [cytoplasm] + D-fructose 6-phosphate [cytoplasm] -> ADP [cytoplasm] + D-fructose 1,6-bisphosphate [cytoplasm] + H+ [cytoplasm] '	1	1	0	1	1
'phosphofructokinase (s7p)'	0.000155707	-1	1000	'ATP [cytoplasm] + sedoheptulose 7-phosphate [cytoplasm] -> ADP [cytoplasm] + H+ [cytoplasm] + sedoheptulose 1,7-bisphosphate [cytoplasm] '	0	0	0	0	0
'phosphoglycerate kinase'	0.0169098	1	1000	'1,3-bisphospho-D-glycerate [cytoplasm] + ADP [cytoplasm] <=> 3-phosphoglycerate [cytoplasm] + ATP [cytoplasm] '	1	0	1	1	1
'phosphomevalonate kinase'	4.11000000000000e-05	-1	1000	'(R)-5-phosphomevalonic acid [cytoplasm] + ATP [cytoplasm] -> (R)-5-diphosphomevalonic acid [cytoplasm] + ADP [cytoplasm] '	0	0	0	0	0
'phosphoribosyl amino imidazolesuccinocarbozamide synthetase'	9.89900000000002e-05	-1	1000	'ATP [cytoplasm] + L-aspartate [cytoplasm] + phosphoribosyl-carboxy-aminoimidazole [cytoplasm] -> 5''-phosphoribosyl-4-(N-succinocarboxamide)-5-aminoimidazole [cytoplasm] + ADP [cytoplasm] + H+ [cytoplasm] + phosphate [cytoplasm] '	0	0	0	0	0
'phosphoribosylaminoimidazole-carboxylase'	9.89900000000002e-05	-1	1000	'5''-phosphoribosyl-5-aminoimidazole [cytoplasm] + ATP [cytoplasm] + carbon dioxide [cytoplasm] + H2O [cytoplasm] -> ADP [cytoplasm] + H+ [cytoplasm] + phosphate [cytoplasm] + phosphoribosyl-carboxy-aminoimidazole [cytoplasm] '	0	0	0	0	0
'phosphoribosylglycinamidine synthetase'	9.89900000000002e-05	-1	1000	'5-phosphoribosylamine [cytoplasm] + ATP [cytoplasm] + L-glycine [cytoplasm] -> 5-phospho-ribosyl-glycineamide [cytoplasm] + ADP [cytoplasm] + H+ [cytoplasm] + phosphate [cytoplasm] '	0	0	0	0	0
'phosphoribosylpyrophosphate synthetase'	0.00030429	-1	1000	'ATP [cytoplasm] + ribose-5-phosphate [cytoplasm] -> AMP [cytoplasm] + H+ [cytoplasm] + PRPP [cytoplasm] '	0	0	0	0	0
'prolyl-tRNA synthetase'	0.0001647	-1	1000	'ATP [cytoplasm] + L-proline [cytoplasm] + tRNA(Pro), cytoplasmic [cytoplasm] -> AMP [cytoplasm] + diphosphate [cytoplasm] + H+ [cytoplasm] + Pro-tRNA(Pro) [cytoplasm] '	0	0	0	0	0
'pyruvate carboxylase'	0.0021244	-1	1000	'ATP [cytoplasm] + bicarbonate [cytoplasm] + pyruvate [cytoplasm] -> ADP [cytoplasm] + H+ [cytoplasm] + oxaloacetate [cytoplasm] + phosphate [cytoplasm] '	0	0	0	0	0
'pyruvate kinase'	0.0148526	1	1000	'ADP [cytoplasm] + H+ [cytoplasm] + phosphoenolpyruvate [cytoplasm] -> ATP [cytoplasm] + pyruvate [cytoplasm] '	1	0	1	1	1
'seryl-tRNA synthetase'	0.0001854	-1	1000	'ATP [cytoplasm] + L-serine [cytoplasm] + tRNA(Ser), cytoplasmic [cytoplasm] -> AMP [cytoplasm] + diphosphate [cytoplasm] + Ser-tRNA(Ser) [cytoplasm] '	0	0	0	0	0
'shikimate kinase'	0.0002643	-1	1000	'ATP [cytoplasm] + shikimate [cytoplasm] -> 3-phosphoshikimic acid [cytoplasm] + ADP [cytoplasm] + H+ [cytoplasm] '	0	0	0	0	0
'threonyl-tRNA synthetase'	0.0001914	-1	1000	'ATP [cytoplasm] + L-threonine [cytoplasm] + tRNA(Thr), cytoplasmic [cytoplasm] -> AMP [cytoplasm] + diphosphate [cytoplasm] + Thr-tRNA(Thr) [cytoplasm] '	0	0	0	0	0
'tryptophanyl-tRNA synthetase'	2.84000000000000e-05	-1	1000	'ATP [cytoplasm] + L-tryptophan [cytoplasm] + tRNA(Trp), cytoplasmic [cytoplasm] -> AMP [cytoplasm] + diphosphate [cytoplasm] + Trp-tRNA(Trp) [cytoplasm] '	0	0	0	0	0
'tyrosyl-tRNA synthetase'	0.000102	-1	1000	'ATP [cytoplasm] + L-tyrosine [cytoplasm] + tRNA(Tyr), cytoplasmic [cytoplasm] -> AMP [cytoplasm] + diphosphate [cytoplasm] + Tyr-tRNA(Tyr) [cytoplasm] '	0	0	0	0	0
'UMP kinase'	5.07000000000002e-05	-1	1000	'ATP [cytoplasm] + UMP [cytoplasm] -> ADP [cytoplasm] + UDP [cytoplasm] '	0	0	0	0	0
'valyl-tRNA synthetase'	0.0002646	-1	1000	'ATP [cytoplasm] + L-valine [cytoplasm] + tRNA(Val), cytoplasmic [cytoplasm] -> AMP [cytoplasm] + diphosphate [cytoplasm] + Val-tRNA(Val) [cytoplasm] '	0	0	0	0	0
'ADP/ATP transporter'	0.0662051	1	1000	'ADP [cytoplasm] + ATP [mitochondrion] + H+ [cytoplasm] <=> ADP [mitochondrion] + ATP [cytoplasm] + H+ [mitochondrion] '	0	0	0	0	0
'cytidylate kinase (dCMP)'	-2.89259999999999e-06	-1	1000	'ATP [cytoplasm] + dCMP [cytoplasm] <=> ADP [cytoplasm] + dCDP [cytoplasm] '	0	0	0	0	0
'deoxyadenylate kinase'	-3.60000000000000e-06	-1	1000	'ATP [cytoplasm] + dAMP [cytoplasm] <=> ADP [cytoplasm] + dADP [cytoplasm] '	0	0	0	0	0
'yeast 6 biomass pseudoreaction'	0.001	-59.276	1000	'1.1348 (1->3)-beta-D-glucan [cytoplasm] + 1.1348 (1->6)-beta-D-glucan [cell envelope] + 0.4588 Ala-tRNA(Ala) [cytoplasm] + 0.046 AMP [cytoplasm] + 0.1607 Arg-tRNA(Arg) [cytoplasm] + 0.1017 Asn-tRNA(Asn) [cytoplasm] + 0.2975 Asp-tRNA(Asp) [cytoplasm] + 59.276 ATP [cytoplasm] + 0.0447 CMP [cytoplasm] + 0.0066 Cys-tRNA(Cys) [cytoplasm] + 0.0036 dAMP [cytoplasm] + 0.0024 dCMP [cytoplasm] + 0.0024 dG…	0	0	0	0	0
'ATP transport, cytoplasm-ER membrane'	-6.36900000000000e-07	-1	1000	'ATP [cytoplasm] <=> ATP [endoplasmic reticulum membrane] '	0	0	0	0	0
'ATP transport, cytoplasm-lipid particle'	3.14231245759375e-23	-1	1000	'ATP [cytoplasm] <=> ATP [lipid particle] '	0	0	0	0	0
	LEAK					-10.8142
	-0.09899	0	0	0	0	0
	-0.108983	0	0	0	0	0
	-0.181606	0	0	0	0	0
	-0.015387	0	0	0	0	0
	-4.62524	0	0	0	0	0
	-0.0573	0	0	0	0	0
	-0.4588	0	0	0	0	0
	-0.1607	0	0	0	0	0
	-0.1607	0	0	0	0	0
	-0.1017	0	0	0	0	0
	-0.1017	0	0	0	0	0
	-0.4348	0	0	0	0	0
	-0.2975	0	0	0	0	0
	-0.0663	0	0	0	0	0
	-0.5426	0	0	0	0	0
	-0.0475926	0	0	0	0	0
	-0.0066	0	0	0	0	0
	0.0024	0	0	0	0	0
	0.969823	0	0	0	0	0
	-0.1647	0	0	0	0	0
	-0.82047	0	0	0	0	0
	-0.1054	0	0	0	0	0
	-0.3018	0	0	0	0	0
	-0.2904	0	0	0	0	0
	-0.04939	0	0	0	0	0
	-0.00339	0	0	0	0	0
	-12.6058	-12.6058	-12.6058	0	-12.6058	-12.6058
	-0.0663	0	0	0	0	0
	-0.3775	0	0	0	0	0
	-0.1927	0	0	0	0	0
	-0.2964	0	0	0	0	0
	-0.2862	0	0	0	0	0
	-0.015387	0	0	0	0	0
	-0.0507	0	0	0	0	0
	-0.0411	0	0	0	0	0
	-0.925221	0	0	0	0	0
	-2.8622	0	0	0	0	0
	-0.1339	0	0	0	0	0
	-0.09899	0	0	0	0	0
	-8.34247	-8.34247	-8.34247	0	-8.34247	-8.34247
	-0.155707	0	0	0	0	0
	16.9098	16.9098	0	16.9098	16.9098	16.9098
	-0.0411	0	0	0	0	0
	-0.09899	0	0	0	0	0
	-0.09899	0	0	0	0	0
	-0.09899	0	0	0	0	0
	-0.30429	0	0	0	0	0
	-0.1647	0	0	0	0	0
	-2.1244	0	0	0	0	0
	14.8526	14.8526	0	14.8526	14.8526	14.8526
	-0.1854	0	0	0	0	0
	-0.2643	0	0	0	0	0
	-0.1914	0	0	0	0	0
	-0.0284	0	0	0	0	0
	-0.102	0	0	0	0	0
	-0.0507	0	0	0	0	0
	-0.2646	0	0	0	0	0
'ADP/ATP transporter'	66.2051	0	0	0	0	0
'cytidylate kinase (dCMP)'	0.0028926	0	0	0	0	0
'deoxyadenylate kinase'	0.0036	0	0	0	0	0
'yeast 6 biomass pseudoreaction'	-59.276	0	0	0	0	0
'ATP transport, cytoplasm-ER membrane'	0.0006369	0	0	0	0	0
'ATP transport, cytoplasm-lipid particle'	-3.14231e-20	0	0	0	0	0
		10.8142	-20.9483	31.7625	10.8142	10.8142

## Sheet: Sheet5
'EX cpd00067 e'	-0.84939	-1000	1000	'H+ <=> '	0
'Orthophosphate-ABC transport'	-0.419058	-1000	1000	'Orthophosphate + ATP + H2O <=> 2 Orthophosphate + H+ + ADP '	0
'EX cpd00421 e'	-0.124572	-1000	1000	'Triphosphate <=> '	0
'ATP:deoxyguanosine 5''-phosphotransferase'	-0.124572	-1000	1000	'ATP + Deoxyguanosine <=> dGMP + ADP '	0
'dGTP triphosphohydrolase'	-0.124572	-1000	1000	'dGTP + H2O <=> Triphosphate + Deoxyguanosine + H+ '	0
'ATP:(d)GMP phosphotransferase'	-0.124572	-1000	1000	'dGMP + ATP <=> dGDP + ADP '	0
'ATP:nucleoside-diphosphate phosphatransferase'	-0.117719	-1000	1000	'ATP + dGDP <=> dGTP + ADP '	0
'EX cpd00027 e'	-0.116305	-10	1000	'D-Glucose <=> '	0
'ATP:3-phospho-D-glycerate 1-phosphotransferase'	-0.0900614	-1000	1000	'ATP + 3-Phospho-D-glycerate + H+ <=> 3-Phospho-D-glyceroyl_phosphate + ADP '	1
'2-Phospho-D-glycerate 2,3-phosphomutase'	-0.0721414	-1000	1000	'2-Phospho-D-glycerate <=> 3-Phospho-D-glycerate '	1
'CO2 transport via diffusion'	-0.0697763	-1000	1000	'CO2 <=> CO2 '	0
'EX cpd00013 e'	-0.0653191	-1000	1000	'NH3 <=> '	0
'Glucose-6-phosphate transport via phosphate antiport'	-0.0554079	-1000	1000	'2 Orthophosphate + D-Glucose_6-phosphate <=> 2 Orthophosphate + D-Glucose_6-phosphate '	0
'alpha-D-Glucoside glucohydrolase'	-0.0520065	-1000	1000	'Maltose + H2O <=> 2 D-Glucose '	0
'D-Glyceraldehyde-3-phosphate ketol-isomerase'	-0.0425404	-1000	1000	'D-Glyceraldehyde_3-phosphate <=> Glycerone_phosphate '	1
'L-Glutamate:NAD+ oxidoreductase (deaminating)'	-0.0350177	-1000	1000	'NAD+ + H2O + L-Glutamate <=> 2-Oxoglutarate + NH3 + H+ + NADH '	0
'Acetyl-CoA:orthophosphate acetyltransferase'	-0.0279361	-1000	1000	'Orthophosphate + Acetyl-CoA + H+ <=> Acetyl_phosphate + CoA '	0
'L-Alanine:NAD+ oxidoreductase (deaminating)'	-0.0252346	-1000	1000	'L-Alanine + NAD+ + H2O <=> NH3 + H+ + Pyruvate + NADH '	0
'Carbonic acid hydro-lyase'	-0.0227681	-1000	1000	'HCO3- + H+ <=> CO2 + H2O '	0
'L-Serine:pyruvate aminotransferase'	-0.0179245	-1000	1000	'Pyruvate + L-Serine <=> L-Alanine + Hydroxypyruvate '	0
'ATP:(R)-glycerate 3-phosphotransferase'	-0.01792	-1000	1000	'ATP + D-Glycerate <=> 3-Phospho-D-glycerate + ADP '	0
'EX cpd00209 e'	-0.0151399	-1000	1000	'Nitrate <=> '	0
'5,10-Methylenetetrahydrofolate:glycine hydroxymethyltransferase'	-0.0140922	-1000	1000	'5,10-Methylenetetrahydrofolate + Glycine + H2O <=> Tetrahydrofolate + L-Serine '	0
'N-(L-Argininosuccinate) arginie-lyase'	-0.0132096	-1000	1000	'N-(L-Arginino)succinate <=> Fumarate + L-Arginine '	0
'L-Citrulline:L-aspartate ligase (AMP-forming)'	-0.0132096	-1000	1000	'L-Aspartate + ATP + L-Citrulline <=> N-(L-Arginino)succinate + AMP + Pyrophosphate '	0
'EX cpd00137 e'	-0.0108976	-1000	1000	'Citrate <=> '	0
'Formate:tetrahydrofolate ligase (ADP-forming)'	-0.0106921	-1000	1000	'Tetrahydrofolate + ATP + Formate <=> Orthophosphate + ADP + 10-Formyltetrahydrofolate '	0
'ATP:alpha-D-glucose-1-phosphate adenyltransferase'	-0.00899927	-1000	1000	'ATP + D-Glucose_1-phosphate <=> ADP-glucose + Pyrophosphate '	0
'cpd00155 phosphorylase'	-0.00899927	-1000	1000	'Orthophosphate + H+ + Glycogen <=> glycogen(n-1) + D-Glucose_1-phosphate '	0
'glycogen synthase (ADPGlc)'	-0.00899927	-1000	1000	'ADP-glucose + glycogen(n-1) <=> Glycogen + ADP '	0
'(S)-malate:NAD+ oxidoreductase'	-0.00835585	-1000	1000	'(S)-Malate + NAD+ <=> Oxaloacetate + H+ + NADH '	0
'nitric oxide, NAD(P)H2:oxygen oxidoreductase'	-0.00756995	-1000	1000	'2 Oxygen + NADH + 2 Nitric_oxide <=> 2 Nitrate + NAD+ + H+ '	0
'L-Arginine,NADPH:oxygen oxidoreductase (nitric-oxide-forming)'	-0.00756995	-1000	1000	'3 Oxygen + NADPH + 2 L-Arginine <=> H+ + 2 H2O + NADP+ + 2 L-Citrulline + 2 Nitric_oxide '	0
'2-Acetolactate pyruvate-lyase (carboxylating)'	-0.007001	-1000	1000	'2-Acetolactate + Thiamin_diphosphate <=> Pyruvate + 2-(alpha-Hydroxyethyl)thiamine_diphosphate '	0
'EX cpd00205 e'	-0.006576	-1000	1000	'Potassium <=> '	0
'D-Ribose-5-phosphate ketol-isomerase'	-0.00634079	-1000	1000	'D-Ribose_5-phosphate <=> D-Ribulose_5-phosphate '	0
'sn-Glycerol-3-phosphate:NADP+ 2-oxidoreductase'	-0.00595981	-1000	1000	'sn-Glycerol_3-phosphate + NADP+ <=> Glycerone_phosphate + NADPH + H+ '	0
'L-Threonine:NAD+ oxidoreductase'	-0.00565268	-1000	1000	'L-Threonine + NAD+ <=> H+ + NADH + L-2-Amino-3-oxobutanoic_acid '	0
'2,3,4,5-Tetrahydrodipicolinate:NADP+ oxidoreductase'	-0.00426781	-1000	1000	'2,3,4,5-Tetrahydrodipicolinate + NADP+ <=> L-2,3-Dihydrodipicolinate + NADPH + H+ '	0
'Acetyl-L,L-diaminopimelate aminotransferase'	-0.00426781	-1000	1000	'2-Oxoglutarate + N6-Acetyl-LL-2,6-diaminoheptanedioate <=> N-Acetyl-L-2-amino-6-oxopimelate + L-Glutamate '	0
'UTP:cytidine 5''-phosphotransferase'	-0.00354176	-1000	1000	'Cytidine + UTP <=> UDP + CMP '	0
'L-leucine:NAD+ oxidoreductase(deaminating)'	-0.00346366	-1000	1000	'NAD+ + L-Leucine + H2O <=> 4-Methyl-2-oxopentanoate + NH3 + H+ + NADH '	0
'3-Isopropylmalate hydro-lyase'	-0.00346366	-1000	1000	'(2R,3S)-3-Isopropylmalate <=> 2-Isopropylmaleate + H2O '	0
'Shikimate:NADP+ 5-oxidoreductase'	-0.00341386	-1000	1000	'NADP+ + Shikimate <=> 3-Dehydroshikimate + NADPH + H+ '	0
'UDP-N-acetyl-D-glucosamine 2-epimerase'	-0.00331119	-1000	1000	'UDP-N-acetyl-D-glucosamine + H2O <=> UDP + N-Acetyl-D-mannosamine '	0
'ATP:N-acetyl-D-glucosamine 6-phosphotransferase'	-0.00331119	-1000	1000	'ATP + N-Acetyl-D-glucosamine <=> N-Acetyl-D-glucosamine_6-phosphate + ADP '	0
'N-Acetyl-D-glucosamine-6-phosphate amidohydrolase'	-0.00331119	-1000	1000	'H2O + N-Acetyl-D-glucosamine_6-phosphate <=> Acetate + D-Glucosamine_6-phosphate '	0
'L-Valine:NAD+ oxidoreductase(deaminating)'	-0.00306842	-1000	1000	'NAD+ + H2O + L-Valine <=> 3-Methyl-2-oxobutanoic_acid + NH3 + H+ + NADH '	0
'IMP 1,2-hydrolase (decyclizing)'	-0.00267419	-1000	1000	'H2O + IMP <=> 1-(5''-Phosphoribosyl)-5-formamido-4-imidazolecarboxamide '	0
'alpha-D-Glucose 1-phosphate 1,6-phosphomutase'	-0.00254936	-1000	1000	'D-Glucose_1-phosphate <=> D-Glucose_6-phosphate '	0
'GTP:uridine 5''-phosphotransferase'	-0.00249204	-1000	1000	'Uridine + GTP <=> UMP + GDP '	0
'L-Glutamate 5-semialdehyde:NAD+ oxidoreductase'	-0.00193025	-1000	1000	'L-Glutamate_5-semialdehyde + NAD+ + H2O <=> 2 H+ + NADH + L-Glutamate '	0
'L-Ornithine:2-oxo-acid aminotransferase'	-0.00193025	-1000	1000	'2-Oxoglutarate + L-Ornithine <=> L-Glutamate_5-semialdehyde + L-Glutamate '	0
'L-Phenylalanine:2-oxoglutarate aminotransferase'	-0.00175904	-1000	1000	'2-Oxoglutarate + L-Phenylalanine <=> Phenylpyruvate + L-Glutamate '	0
'Sedoheptulose-7-phosphate:D-glyceraldehyde-3-phosphate'	-0.00170693	-1000	1000	'Sedoheptulose_7-phosphate + D-Glyceraldehyde_3-phosphate <=> D-Ribose_5-phosphate + D-Xylulose_5-phosphate '	0
'EX cpd00048 e'	-0.0017044	-1000	1000	'Sulfate <=> '	0
'L-1-Pyrroline-5-carboxylate:NAD+ oxidoreductase'	-0.00160686	-1000	1000	'NAD+ + 2 H2O + (S)-1-Pyrroline-5-carboxylate <=> H+ + NADH + L-Glutamate '	0
'L-Proline:NADP+ 5-oxidoreductase'	-0.00128519	-1000	1000	'L-Proline + NADP+ <=> NADPH + H+ + (S)-1-Pyrroline-5-carboxylate '	0
'(S)-Dihydroorotate amidohydrolase'	-0.00122138	-1000	1000	'(S)-Dihydroorotate + H2O <=> N-Carbamoyl-L-aspartate + H+ '	0
'5-methyltetrahydrofolate:NADP+ oxidoreductase'	-0.00113492	-1000	1000	'5-Methyltetrahydrofolate + NADP+ <=> 5,10-Methylenetetrahydrofolate + NADPH + H+ '	0
'L-Homoserine:NADP+ oxidoreductase'	-0.00113342	-1000	1000	'L-Homoserine + NADP+ <=> L-Aspartate_4-semialdehyde + NADPH + H+ '	0
'L-Serine hydro-lyase (adding homocysteine)'	-0.00113342	-1000	1000	'L-Homocysteine + L-Serine <=> Cystathionine + H2O '	0
'O-Succinyl-L-homoserine succinate-lyase (adding cysteine)'	-0.00113342	-1000	1000	'Cystathionine + H+ + Succinate <=> O-Succinyl-L-homoserine + L-Cysteine '	0
'succinyl-CoA:enzyme N6-(dihydrolipoyl)lysine S-succinyltransferase'	-0.00113342	-1000	1000	'Dihydrolipoamide + Succinyl-CoA <=> S-Succinyldihydrolipoamide + CoA '	0
'L-Tyrosine:2-oxoglutarate aminotransferase'	-0.00110805	-1000	1000	'2-Oxoglutarate + L-Tyrosine <=> 3-(4-Hydroxyphenyl)pyruvate + L-Glutamate '	0
'(S)-2-methylbutanoyl-CoA:enzyme N6-(dihydrolipoyl)lysine'	-0.001091	-1000	1000	'Dihydrolipoamide + 2-Methylbutanoyl-CoA <=> [Dihydrolipoyllysine-residue_(2-methylpropanoyl)transferase] S-(2-methylbutanoyl)dihydrolipoyllysine + CoA '	0
'D-Ala-D-Ala dipeptidase'	-0.00101563	-1000	1000	'D-Alanyl-D-alanine + H2O <=> 2 D-Alanine '	0
'acetate transport in/out via proton symport'	-0.000958635	-1000	1000	'Acetate + H+ <=> Acetate + H+ '	0
'ATP:AMP phosphotransferase'	-0.0009475	-1000	1000	'ATP + AMP <=> 2 ADP '	0
'EX cpd00254 e'	-0.0009474	-1000	1000	'Magnesium <=> '	0
'5-Amino-2-oxopentanoate:2-oxoglutarate aminotransferase'	-0.000816906	-1000	1000	'L-Histidinol_phosphate + 2-Oxoglutarate <=> L-Glutamate + 3-(Imidazol-4-yl)-2-oxopropyl_phosphate '	0
'Butanoyl-CoA:acetoacetate CoA-transferase'	-0.000582763	-1000	1000	'Acetoacetate + Butanoyl-CoA <=> Butanoic_acid + Acetoacetyl-CoA '	0
'3-Methylcrotonoyl-CoA:carbon-dioxide ligase (ADP-forming)'	-0.000582763	-1000	1000	'ATP + HCO3- + 3-Methylcrotonyl-CoA <=> Orthophosphate + H+ + ADP + 3-Methylglutaconyl-CoA '	0
'(S)-3-Hydroxy-3-methylglutaryl-CoA acetoacetate-lyase'	-0.000582763	-1000	1000	'(S)-3-Hydroxy-3-methylglutaryl-CoA <=> Acetoacetate + Acetyl-CoA '	0
'2-methylpropanoyl-CoA:enzyme N6-(dihydrolipoyl)lysine'	-0.000464909	-1000	1000	'Dihydrolipoamide + 2-Methylpropanoyl-CoA <=> S-(2-Methylpropanoyl)-dihydrolipoamide + CoA '	0
'(S)-Hydroxyoctanoyl-CoA:NAD+ oxidoreductase'	-0.000340189	-1000	1000	'(S)-Hydroxyoctanoyl-CoA + NAD+ <=> 3-Oxooctanoyl-CoA + H+ + NADH '	0
'(S)-3-Hydroxydodecanoyl-CoA:NAD+ oxidoreductase'	-0.000340189	-1000	1000	'NAD+ + (S)-3-Hydroxydodecanoyl-CoA <=> H+ + NADH + 3-Oxododecanoyl-CoA '	0
'(S)-Hydroxydecanoyl-CoA:NAD+ oxidoreductase'	-0.000340189	-1000	1000	'(S)-Hydroxydecanoyl-CoA + NAD+ <=> 3-Oxodecanoyl-CoA + H+ + NADH '	0
'(S)-Hydroxyhexanoyl-CoA:NAD+ oxidoreductase'	-0.000340189	-1000	1000	'NAD+ + (S)-Hydroxyhexanoyl-CoA <=> 3-Oxohexanoyl-CoA + H+ + NADH '	0
'(S)-3-Hydroxytetradecanoyl-CoA:NAD+ oxidoreductase'	-0.000340189	-1000	1000	'(S)-3-Hydroxytetradecanoyl-CoA + NAD+ <=> 3-Oxotetradecanoyl-CoA + H+ + NADH '	0
'Proline dehydrogenase'	-0.000321673	-1000	1000	'L-Proline + FAD <=> FADH2 + (S)-1-Pyrroline-5-carboxylate '	0
'L-Aspartate:2-oxoglutarate aminotransferase'	-0.000292541	-1000	1000	'L-Aspartate + 2-Oxoglutarate <=> Oxaloacetate + L-Glutamate '	0
'(S)-3-Hydroxyhexadecanoyl-CoA:NAD+ oxidoreductase'	-0.000287511	-1000	1000	'(S)-3-Hydroxyhexadecanoyl-CoA + NAD+ <=> 3-Oxopalmitoyl-CoA + H+ + NADH '	0
'dATP:uridine 5''-phosphotransferase'	-0.00022984	-1000	1000	'Uridine + dATP <=> UMP + dADP '	0
'dTTP:cytidine 5''-phosphotransferase'	-0.000228982	-1000	1000	'dTTP + Cytidine <=> CMP + dTDP '	0
'ATP:dTMP phosphotransferase'	-0.000228982	-1000	1000	'dUMP + ATP <=> ADP + dUDP '	0
'dCTP:cytidine 5''-phosphotransferase'	-0.000173784	-1000	1000	'Cytidine + dCTP <=> dCDP + CMP '	0
'anteisopentadecanoyl-Diacylglycerol kinase'	-0.000102854	-1000	1000	'1,2-Dianteisopentadecanoyl-sn-glycerol + ATP <=> 1,2-dianteisopentadecanoyl-sn-glycerol_3-phosphate + ADP '	0
'hexadecanoyl-ACP:[acyl-carrier-protein] transferase'	-7.31871183999996e-05	-1000	1000	'Hexadecanoyl-[acp] + CoA <=> Palmitoyl-CoA + Acyl-carrier_protein '	0
'isopentadecanoyl-Diacylglycerol kinase'	-6.07045440000000e-05	-1000	1000	'1,2-Diisopentadecanoyl-sn-glycerol + ATP <=> ADP + 1,2-diisopentadecanoyl-sn-glycerol_3-phosphate '	0
'anteisoheptadecanoyl-Diacylglycerol kinase'	-5.38052640000000e-05	-1000	1000	'1,2-Dianteisoheptadecanoyl-sn-glycerol + ATP <=> ADP + 1,2-dianteisoheptadecanoyl-sn-glycerol_3-phosphate '	0
'EX cpd10516 e'	-3.20900000000000e-05	-1000	1000	'Fe3+ <=> '	0
'diacylglycerol kinase (n-C16:0)'	-3.08652720000000e-05	-1000	1000	'1,2-Diacyl-sn-glycerol_dihexadecanoyl + ATP <=> 1,2-dihexadecanoyl-sn-glycerol_3-phosphate + ADP '	0
'EX cpd00063 e'	-2.98300000000002e-05	-1000	1000	'Calcium <=> '	0
'isoheptadecanoyl-Diacylglycerol kinase'	-2.28927200000000e-05	-1000	1000	'ATP + 1,2-Diisoheptadecanoyl-sn-glycerol <=> 1,2-diisoheptadecanoyl-sn-glycerol_3-phosphate + ADP '	0
'isohexadecanoyl-Diacylglycerol kinase'	-1.43648208000000e-05	-1000	1000	'ATP + 1,2-Diisohexadecanoyl-sn-glycerol <=> 1,2-diisohexadecanoyl-sn-glycerol_3-phosphate + ADP '	0
'diacylglycerol kinase (n-C18:0)'	-1.07094032000000e-05	-1000	1000	'ATP + 1,2-Diacyl-sn-glycerol_dioctadecanoyl <=> 1,2-dioctadecanoyl-sn-glycerol_3-phosphate + ADP '	0
'NADPH:protein-disulfide oxidoreductase'	-1.04839000000000e-05	-1000	1000	'NADP+ + Protein_dithiol <=> NADPH + H+ + Protein_disulfide '	0
'1-Deoxy-D-xylulose-5-phosphate isomeroreductase'	-1.04839000000000e-05	-1000	1000	'2-C-Methyl-D-erythritol_4-phosphate + NADP+ <=> NADPH + 1-Deoxy-D-xylulose_5-phosphate + H+ '	0
'diacylglycerol kinase (n-C14:0)'	-7.45335040000000e-06	-1000	1000	'1,2-Diacyl-sn-glycerol_ditetradecanoyl + ATP <=> ADP + 1,2-ditetradecanoyl-sn-glycerol_3-phosphate '	0
'(R)-Pantoate:NADP+ 2-oxidoreductase'	-4.00727000000452e-06	-1000	1000	'(R)-Pantoate + NADP+ <=> 2-Dehydropantoate + NADPH + H+ '	0
'isotetradecanoyl-Diacylglycerol kinase'	-3.56464320000000e-06	-1000	1000	'1,2-Diisotetradecanoyl-sn-glycerol + ATP <=> 1,2-diisotetradecanoyl-sn-glycerol_3-phosphate + ADP '	0
'glyoxylate transport in via proton symport'	-2.06830999999766e-06	-1000	1000	'H+ + Glyoxylate <=> H+ + Glyoxylate '	0
'5,6,7,8-Tetrahydrofolate:NADP+ oxidoreductase'	-2.06830999999766e-06	-1000	1000	'Tetrahydrofolate + NADP+ <=> Dihydrofolate + NADPH + H+ '	0
'Trimetaphosphate transport in via proton symport'	-1.62536380040838e-18	-1000	1000	'Thiamin_monophosphate + H+ <=> Thiamin_monophosphate + H+ '	0
'ATP:thiamin-phosphate phosphotransferase'	-1.62536380040838e-18	-1000	1000	'ATP + Thiamin_monophosphate <=> ADP + Thiamin_diphosphate '	0
'EX cpd00220 e'	-7.04851685040687e-21	0	1000	'Riboflavin <=> '	0
'ATP:deoxyuridine 5''-phosphotransferase'	-5.97269634032656e-30	-1000	1000	'ATP + Deoxyuridine <=> dUMP + ADP '	0
'(S)-Lactate:NAD+ oxidoreductase'	-3.28080177067130e-30	-1000	1000	'NAD+ + (S)-Lactate <=> H+ + Pyruvate + NADH '	0
'choline dehydrogenase (FAD-dependent)'	-2.46555801408624e-31	-1000	1000	'Choline + FAD <=> Betaine_aldehyde + FADH2 '	0
'p-cumic alcohol:NAD+ oxidoreductase'	-2.46183381499397e-31	-1000	1000	'Betaine_aldehyde + NAD+ + H2O <=> Betaine + 2 H+ + NADH '	0
'Glycogen transport in'	-7.15292974889409e-32	-1000	1000	'Glycogen <=> Glycogen '	0
'3-methylbutanoyl-CoA:enzyme N6-(dihydrolipoyl)lysine'	-7.77161634619631e-33	-1000	1000	'Dihydrolipoamide + 3-Methylbutanoyl-CoA <=> [Dihydrolipoyllysine-residue_(2-methylpropanoyl)transferase] S-(3-methylbutanoyl)dihydrolipoyllysine + CoA '	0
'EX cpd00540 e'	-4.10757433227075e-35	0	1000	'Betaine <=> '	0
'betaine (glycine betaine) transport in/out via proton symport'	4.10757433227075e-35	-1000	1000	'Betaine + H+ <=> Betaine + H+ '	0
'(2S,3R)-3-Hydroxybutane-1,2,3-tricarboxylate pyruvate-lyase'	8.20026736765234e-35	-1000	1000	'(2S,3R)-3-Hydroxybutane-1,2,3-tricarboxylate <=> Pyruvate + Succinate '	0
'rxn07433'	3.79744655717307e-33	-1000	1000	'3-Methyl-1-hydroxybutyl-ThPP + Lipoamide <=> [Dihydrolipoyllysine-residue_(2-methylpropanoyl)transferase] S-(3-methylbutanoyl)dihydrolipoyllysine + Thiamin_diphosphate '	0
'2-Deoxy-D-ribose 1-phosphate 1,5-phosphomutase'	5.36157019588789e-32	-1000	1000	'2-Deoxy-D-ribose_1-phosphate <=> 2-Deoxy-D-ribose_5-phosphate '	0
'EX cpd00155 e'	7.15292974889409e-32	0	1000	'Glycogen <=> '	0
'2-Deoxy-D-ribose-5-phosphate acetaldehyde-lyase'	8.04704596750585e-32	-1000	1000	'2-Deoxy-D-ribose_5-phosphate <=> Acetaldehyde + D-Glyceraldehyde_3-phosphate '	0
'deoxyuridine:orthophosphate 2-deoxy-D-ribosyltransferase'	1.16167354244238e-31	-1000	1000	'Orthophosphate + H+ + Deoxyuridine <=> Uracil + 2-Deoxy-D-ribose_1-phosphate '	0
'ATP:choline phosphotransferase'	2.45881960118234e-31	-1000	1000	'Choline + ATP <=> Choline_phosphate + ADP '	0
'glycine transport in/out via proton symport'	2.77606303672187e-30	-1000	1000	'H+ + Glycine <=> H+ + Glycine '	0
'Acetaldehyde:NAD+ oxidoreductase'	9.17164265862207e-30	-1000	1000	'Acetaldehyde + NAD+ + H2O <=> Acetate + 2 H+ + NADH '	0
'ATP:FMN adenylyltransferase'	7.04851685040687e-21	0	1000	'FMN + ATP -> Pyrophosphate + FAD '	0
'ATP:riboflavin 5''-phosphotransferase'	7.04851685040687e-21	-1000	1000	'ATP + Riboflavin <=> FMN + ADP '	0
'riboflavin transport in/out via proton symport'	7.04851685040687e-21	-1000	1000	'Riboflavin + H+ <=> Riboflavin + H+ '	0
'EX cpd00793 e'	1.62536380040838e-18	0	1000	'Thiamin_monophosphate <=> '	0
'isotetradecanoyl-lipoteichoic acid synthesis (n=24), linked, N-acetylglucosamine substituted'	6.77008000000000e-08	-1000	1000	'24 UDP-N-acetyl-D-glucosamine + Isotetradecanoyllipoteichoic_acid (n=24), linked, unsubstituted <=> Isotetradecanoyllipoteichoic_acid (n=24), linked, N-acetyl-D-glucosamine + 24 UDP '	0
'isotetradecanoyl-lipoteichoic acid synthesis (n=24), linked, glucose substituted'	7.56352000000000e-08	-1000	1000	'Isotetradecanoyllipoteichoic_acid (n=24), linked, unsubstituted + 24 UDP-glucose <=> 24 UDP + Isotetradecanoyllipoteichoic_acid (n=24), linked, glucose substituted '	0
'myristoyl-cardiolipin synthase'	1.12784000000000e-07	-1000	1000	'2 Phosphatidylglycerol_ditetradecanoyl <=> Glycerol + Myristoylcardiolipin_(B. subtilis) '	0
'myristoyl-lipoteichoic acid synthesis (n=24), linked, N-acetylglucosamine substituted'	1.41512000000000e-07	-1000	1000	'24 UDP-N-acetyl-D-glucosamine + Myristoyllipoteichoic_acid (n=24), linked, unsubstituted <=> 24 UDP + Myristoyllipoteichoic_acid (n=24), linked, N-acetyl-D-glucosamine '	0
'stearoyl-cardiolipin synthase'	1.53672000000000e-07	-1000	1000	'2 Phosphatidylglycerol_dioctadecanoyl <=> Glycerol + Stearoylcardiolipin_(B. subtilis) '	0
'myristoyl-lipoteichoic acid synthesis (n=24), linked, glucose substituted'	1.58110400000000e-07	-1000	1000	'Myristoyllipoteichoic_acid (n=24), linked, unsubstituted + 24 UDP-glucose <=> Myristoyllipoteichoic_acid (n=24), linked, glucose substituted + 24 UDP '	0
'isohexadecanoyl-cardiolipin synthase'	2.11356000000000e-07	-1000	1000	'2 Diisohexadecanoylphosphatidylglycerol <=> Glycerol + Isohexadecanoylcardiolipin_(B. subtilis) '	0
'isotetradecanoyl-lipoteichoic acid synthesis (n=24), unlinked, D-alanine substituted'	2.15171200000000e-07	0	1000	'24 D-Alanine + 24 ATP + Isotetradecanoyllipoteichoic_acid (n=24), linked, unsubstituted -> 24 AMP + 24 Pyrophosphate + Isotetradecanoyllipoteichoic_acid (n=24), linked, D-alanine substituted '	0
'stearoyl-lipoteichoic acid synthesis (n=24), linked, N-acetylglucosamine substituted'	2.24990400000000e-07	-1000	1000	'Stearoyllipoteichoic_acid (n=24), linked, unsubstituted + 24 UDP-N-acetyl-D-glucosamine <=> 24 UDP + Stearoyllipoteichoic_acid (n=24), linked, N-acetyl-D-glucosamine '	0
'stearoyl-lipoteichoic acid synthesis (n=24), linked, glucose substituted'	2.51012800000000e-07	-1000	1000	'Stearoyllipoteichoic_acid (n=24), linked, unsubstituted + 24 UDP-glucose <=> 24 UDP + Stearoyllipoteichoic_acid (n=24), linked, glucose substituted '	0
'isotetradecanoyl-lysylphosphatidylglycerol synthesis'	2.52016000000000e-07	0	1000	'ATP + L-Lysine + H+ + Diisotetradecanoylphosphatidylglycerol -> AMP + Isotetradecanoyllysylphophatidylglycerol + Pyrophosphate '	0
'isohexadecanoyl-lipoteichoic acid synthesis (n=24), linked, N-acetylglucosamine substituted'	2.87492800000000e-07	-1000	1000	'24 UDP-N-acetyl-D-glucosamine + Isohexadecanoyllipoteichoic_acid (n=24), linked, unsubstituted <=> 24 UDP + Isohexadecanoyllipoteichoic_acid (n=24), linked, N-acetyl-D-glucosamine '	0
'isohexadecanoyl-lipoteichoic acid synthesis (n=24), linked, glucose substituted'	3.21024000000000e-07	-1000	1000	'Isohexadecanoyllipoteichoic_acid (n=24), linked, unsubstituted + 24 UDP-glucose <=> 24 UDP + Isohexadecanoyllipoteichoic_acid (n=24), linked, glucose substituted '	0
'isoheptadecanoyl-cardiolipin synthase'	3.32500000000000e-07	-1000	1000	'2 Diisoheptadecanoylphosphatidylglycerol <=> Isoheptadecanoylcardiolipin_(B. subtilis) + Glycerol '	0
'myristoyl-lipoteichoic acid synthesis (n=24), unlinked, D-alanine substituted'	4.49920000000000e-07	0	1000	'24 D-Alanine + 24 ATP + Myristoyllipoteichoic_acid (n=24), linked, unsubstituted -> 24 AMP + Myristoyllipoteichoic_acid (n=24), linked, D-alanine substituted + 2 H+ + 24 Pyrophosphate '	0
'palmitoyl-cardiolipin synthase'	4.54252000000000e-07	-1000	1000	'2 Phosphatidylglycerol_dihexadecanoyl <=> Palmitoylcardiolipin_(B. subtilis) + Glycerol '	0
'isoheptadecanoyl-lipoteichoic acid synthesis (n=24), linked, N-acetylglucosamine substituted'	4.69680000000000e-07	-1000	1000	'24 UDP-N-acetyl-D-glucosamine + Isoheptadecanoyllipoteichoic_acid (n=24), linked, unsubstituted <=> Isoheptadecanoyllipoteichoic_acid (n=24), linked, N-acetyl-D-glucosamine + 24 UDP '	0
'isotetradecanoyl-lipoteichoic acid synthesis (n=24), linked, unsubstituted'	5.21603200000000e-07	-1000	1000	'Diglucosyl-1,2_diisotetradecanoylglycerol + 24 CDP-glycerol <=> 24 CMP + Isotetradecanoyllipoteichoic_acid (n=24), linked, unsubstituted '	0
'isoheptadecanoyl-lipoteichoic acid synthesis (n=24), linked, glucose substituted'	5.24096000000000e-07	-1000	1000	'Isoheptadecanoyllipoteichoic_acid (n=24), linked, unsubstituted + 24 UDP-glucose <=> 24 UDP + Isoheptadecanoyllipoteichoic_acid (n=24), linked, glucose substituted '	0
'myristoyl-lysylphosphatidylglycerol synthesis'	5.26984000000000e-07	0	1000	'ATP + L-Lysine + H+ + Phosphatidylglycerol_ditetradecanoyl -> AMP + Myristoyllysylphophatidylglycerol + Pyrophosphate '	0
'palmitoyl-lipoteichoic acid synthesis (n=24), linked, N-acetylglucosamine substituted'	6.17728000000000e-07	-1000	1000	'24 UDP-N-acetyl-D-glucosamine + Palmitoyllipoteichoic_acid (n=24), linked, unsubstituted <=> 24 UDP + Palmitoyllipoteichoic_acid (n=24), linked, N-acetyl-D-glucosamine '	0
'palmitoyl-lipoteichoic acid synthesis (n=24), linked, glucose substituted'	6.89776000000000e-07	-1000	1000	'24 UDP-glucose + Palmitoyllipoteichoic_acid (n=24), linked, unsubstituted <=> 24 UDP + Palmitoyllipoteichoic_acid (n=24), linked, glucose substituted '	0
'stearoyl-lipoteichoic acid synthesis (n=24), unlinked, D-alanine substituted'	7.11056000000000e-07	0	1000	'Stearoyllipoteichoic_acid (n=24), linked, unsubstituted + 24 D-Alanine + 24 ATP -> Stearoyllipoteichoic_acid (n=24), linked, D-alanine substituted + 24 AMP + 24 Pyrophosphate '	0
'stearoyl-lysylphosphatidylglycerol synthesis'	7.43052000000000e-07	0	1000	'ATP + L-Lysine + H+ + Phosphatidylglycerol_dioctadecanoyl -> AMP + Pyrophosphate + Stearoyllysylphophatidylglycerol '	0
'isotetradecanoyl-UDP-glucosyltransferase (triglucosyl)'	7.61520000000000e-07	-1000	1000	'Diglucosyl-1,2_diisotetradecanoylglycerol + UDP-glucose <=> Triglucosyl-1,2_diisotetradecanoylglycerol + UDP '	0
'anteisoheptadecanoyl-cardiolipin synthase'	7.81280000000000e-07	-1000	1000	'2 Dianteisoheptadecanoylphosphatidylglycerol <=> Anteisoheptadecanoylcardiolipin_(B. subtilis) + Glycerol '	0
'isopentadecanoyl-cardiolipin synthase'	9.05920000000000e-07	-1000	1000	'2 Diisopentadecanoylphosphatidylglycerol <=> Isopentadecanoylcardiolipin_(B. subtilis) + Glycerol '	0
'isohexadecanoyl-lipoteichoic acid synthesis (n=24), unlinked, D-alanine substituted'	9.11088000000000e-07	0	1000	'24 D-Alanine + Isohexadecanoyllipoteichoic_acid (n=24), linked, unsubstituted + 24 ATP -> 24 AMP + Isohexadecanoyllipoteichoic_acid (n=24), linked, D-alanine substituted + 24 Pyrophosphate '	0
'isohexadecanoyl-lysylphosphatidylglycerol synthesis'	1.00624000000000e-06	0	1000	'Diisohexadecanoylphosphatidylglycerol + ATP + L-Lysine + H+ -> Isohexadecanoyllysylphophatidylglycerol + AMP + Pyrophosphate '	0
'myristoyl-lipoteichoic acid synthesis (n=24), linked, unsubstituted'	1.09063040000000e-06	-1000	1000	'Diglucosyl-1,2_dimyristoylglycerol + 24 CDP-glycerol <=> 24 CMP + Myristoyllipoteichoic_acid (n=24), linked, unsubstituted '	0
'anteisoheptadecanoyl-lipoteichoic acid synthesis (n=24), linked, N-acetylglucosamine substituted'	1.10382400000000e-06	-1000	1000	'24 UDP-N-acetyl-D-glucosamine + Anteisoheptadecanoyllipoteichoic_acid (n=24), linked, unsubstituted <=> 24 UDP + Anteisoheptadecanoyllipoteichoic_acid (n=24), linked, N-acetyl-D-glucosamine '	0
'isopentadecanoyl-lipoteichoic acid synthesis (n=24), linked, N-acetylglucosamine substituted'	1.18408000000000e-06	-1000	1000	'24 UDP-N-acetyl-D-glucosamine + Isopentadecanoyllipoteichoic_acid (n=24), linked, unsubstituted <=> 24 UDP + Isopentadecanoyllipoteichoic_acid (n=24), linked, N-acetyl-D-glucosamine '	0
'anteisoheptadecanoyl-lipoteichoic acid synthesis (n=24), linked, glucose substituted'	1.23211200000000e-06	-1000	1000	'Anteisoheptadecanoyllipoteichoic_acid (n=24), linked, unsubstituted + 24 UDP-glucose <=> 24 UDP + Anteisoheptadecanoyllipoteichoic_acid (n=24), linked, glucose substituted '	0
'isopentadecanoyl-lipoteichoic acid synthesis (n=24), linked, glucose substituted'	1.32240000000000e-06	-1000	1000	'Isopentadecanoyllipoteichoic_acid (n=24), linked, unsubstituted + 24 UDP-glucose <=> Isopentadecanoyllipoteichoic_acid (n=24), linked, glucose substituted + 24 UDP '	0
'isoheptadecanoyl-lipoteichoic acid synthesis (n=24), unlinked, D-alanine substituted'	1.48625600000000e-06	0	1000	'24 D-Alanine + 24 ATP + Isoheptadecanoyllipoteichoic_acid (n=24), linked, unsubstituted -> 24 AMP + 24 Pyrophosphate + Isoheptadecanoyllipoteichoic_acid (n=24), linked, D-alanine substituted '	0
'Chorismate hydroxymutase'	1.49770000000000e-06	-1000	1000	'Chorismate <=> Isochorismate '	0
'O-succinylbenzoate-CoA synthase'	1.49770000000000e-06	0	1000	'2-Succinyl-6-hydroxy-2,4-cyclohexadiene-1-carboxylate -> 2-Succinylbenzoate + H2O '	0
'isochorismate:2-oxoglutarate:cyclodienyltransferase(decarboxylating,'	1.49770000000000e-06	0	1000	'Isochorismate + 2-Oxoglutarate + H+ -> CO2 + 2-Succinyl-6-hydroxy-2,4-cyclohexadiene-1-carboxylate + Pyruvate '	0
'rxn05023'	1.49770000000000e-06	0	1000	'1,4-Dihydroxy-2-naphthoyl-CoA + H2O -> H+ + 1,4-Dihydroxy-2-naphthoate + CoA '	0
'AMMQT7'	1.49770000000000e-06	0	1000	'NADPH + 2dmmq7 + S-Adenosyl-L-methionine -> mql7 + S-Adenosyl-L-homocysteine + NADP+ '	0
'AMP:pyrophosphate phosphoribosyltransferase'	1.49770000000000e-06	0	1000	'5-Phospho-alpha-D-ribose_1-diphosphate + Adenine -> AMP + Pyrophosphate '	0
'DHNAOT7'	1.49770000000000e-06	0	1000	'NAD+ + 1,4-Dihydroxy-2-naphthoate + all-trans-Heptaprenyl_diphosphate -> CO2 + NADH + Pyrophosphate + 2dmmq7 '	0
'rxn05024'	1.49770000000000e-06	0	1000	'2-Succinylbenzoyl-CoA + H+ -> 1,4-Dihydroxy-2-naphthoyl-CoA + H2O '	0
'S-Adenosyl-L-homocysteine hydrolase'	1.49770000000000e-06	-1000	1000	'H2O + S-Adenosyl-L-homocysteine <=> Adenosine + L-Homocysteine '	0
'trans-hexaprenyltranstransferase'	1.49770000000000e-06	0	1000	'all-trans-Hexaprenyl_diphosphate + Isopentenyl_diphosphate -> all-trans-Heptaprenyl_diphosphate + Pyrophosphate '	0
'trans,trans-Farnesyl-diphosphate:isopentenyl-diphosphate'	1.49770000000000e-06	0	1000	'Isopentenyl_diphosphate + trans,trans-Farnesyl_diphosphate -> Geranylgeranyl_diphosphate + Pyrophosphate '	0
'ATP:L-methione S-adenosyltransferase'	1.49770000000000e-06	0	1000	'L-Methionine + ATP + H2O -> Orthophosphate + Pyrophosphate + S-Adenosyl-L-methionine '	0
'Geranyl-diphosphate:isopentenyl-diphosphate geranyltrans-transferase'	1.49770000000000e-06	0	1000	'Geranyl_diphosphate + Isopentenyl_diphosphate -> Pyrophosphate + trans,trans-Farnesyl_diphosphate '	0
'PPTT'	1.49770000000000e-06	0	1000	'all-trans-Pentaprenyl_diphosphate + Isopentenyl_diphosphate -> all-trans-Hexaprenyl_diphosphate + Pyrophosphate '	0
'Adenosine:orthophosphate ribosyltransferase'	1.49770000000000e-06	-1000	1000	'Orthophosphate + Adenosine + H+ <=> Adenine + alpha-D-Ribose_1-phosphate '	0
'O-Succinylbenzoate:CoA ligase (AMP-forming)'	1.49770000000000e-06	0	1000	'2-Succinylbenzoate + ATP + H+ + CoA -> 2-Succinylbenzoyl-CoA + AMP + Pyrophosphate '	0
'D-Ribose 1,5-phosphomutase'	1.49770000000000e-06	-1000	1000	'alpha-D-Ribose_1-phosphate <=> D-Ribose_5-phosphate '	0
'dimethyallyl diphosphate:NADP+ oxidoreductase'	1.49770000000000e-06	0	1000	'NADPH + H+ + 1-Hydroxy-2-methyl-2-butenyl_4-diphosphate -> Dimethylallyl_diphosphate + H2O + NADP+ '	0
'GGTT'	1.49770000000000e-06	0	1000	'Geranylgeranyl_diphosphate + Isopentenyl_diphosphate -> all-trans-Pentaprenyl_diphosphate + Pyrophosphate '	0
'Dimethylallyl-diphosphate:isopentenyl-diphosphate'	1.49770000000000e-06	0	1000	'Dimethylallyl_diphosphate + Isopentenyl_diphosphate -> Geranyl_diphosphate + Pyrophosphate '	0
'anteisopentadecanoyl-cardiolipin synthase'	1.53444000000000e-06	-1000	1000	'2 Dianteisopentadecanoylphosphatidylglycerol <=> Anteisopentadecanoylcardiolipin_(B. subtilis) + Glycerol '	0
'myristoyl-UDP-glucosyltransferase (triglucosyl)'	1.59220000000000e-06	-1000	1000	'Diglucosyl-1,2_dimyristoylglycerol + UDP-glucose <=> UDP + Triglucosyl-1,2_dimyristoylglycerol '	0
'isoheptadecanoyl-lysylphosphatidylglycerol synthesis'	1.59600000000000e-06	0	1000	'ATP + L-Lysine + Diisoheptadecanoylphosphatidylglycerol + H+ -> AMP + Pyrophosphate + Isoheptadecanoyllysylphophatidylglycerol '	0
'stearoyl-lipoteichoic acid synthesis (n=24), linked, unsubstituted'	1.72240320000000e-06	-1000	1000	'Diglucosyl-1,2_distearoylglycerol + 24 CDP-glycerol <=> Stearoyllipoteichoic_acid (n=24), linked, unsubstituted + 24 CMP '	0
'palmitoyl-lipoteichoic acid synthesis (n=24), unlinked, D-alanine substituted'	1.95806400000000e-06	0	1000	'24 D-Alanine + 24 ATP + Palmitoyllipoteichoic_acid (n=24), linked, unsubstituted -> 24 AMP + 24 Pyrophosphate + Palmitoyllipoteichoic_acid (n=24), linked, D-alanine substituted '	0
'anteisopentadecanoyl-lipoteichoic acid synthesis (n=24), linked, N-acetylglucosamine substituted'	2.00609600000000e-06	-1000	1000	'24 UDP-N-acetyl-D-glucosamine + Anteisopentadecanoyllipoteichoic_acid (n=24), linked, unsubstituted <=> 24 UDP + Anteisopentadecanoyllipoteichoic_acid (n=24), linked, N-acetyl-D-glucosamine '	0
'Glycolate:NAD+ oxidoreductase'	2.06830999999766e-06	-1000	1000	'Glycolate + NAD+ <=> H+ + Glyoxylate + NADH '	0
'4-amino-4-deoxychorismate pyruvate-lyase'	2.06830999999766e-06	0	1000	'4-Amino-4-deoxychorismate -> 4-Aminobenzoate + H+ + Pyruvate '	0
'chorismate:L-glutamine aminotransferase'	2.06830999999766e-06	-1000	1000	'Chorismate + L-Glutamine <=> 4-Amino-4-deoxychorismate + L-Glutamate '	0
'2-Amino-4-hydroxy-6-hydroxymethyl-7,8-dihydropteridine:4-'	2.06830999999766e-06	-1000	1000	'4-Aminobenzoate + 2-Amino-4-hydroxy-6-hydroxymethyl-7,8-dihydropteridine <=> Dihydropteroate + H2O '	0
'glycolaldehyde:NAD+ oxidoreductase'	2.06830999999766e-06	-1000	1000	'NAD+ + Glycolaldehyde + H2O <=> Glycolate + 2 H+ + NADH '	0
'2-Amino-4-hydroxy-6-(D-erythro-1,2,3-trihydroxypropyl)-7,8-'	2.06830999999766e-06	-1000	1000	'2-Amino-4-hydroxy-6-(D-erythro-1,2,3-trihydroxypropyl)-7,8-_dihydropteridine <=> Glycolaldehyde + 2-Amino-4-hydroxy-6-hydroxymethyl-7,8-dihydropteridine '	0
'GTP 7,8-8,9-dihydrolase'	2.06830999999766e-06	0	1000	'H2O + GTP -> 2-Amino-4-hydroxy-6-(erythro-1,2,3-trihydroxypropyl)dihydropteridine_triphosphate + H+ + Formate '	0
'2-Amino-4-hydroxy-6-(erythro-1,2,3-trihydroxypropyl)'	2.06830999999766e-06	0	1000	'2-Amino-4-hydroxy-6-(erythro-1,2,3-trihydroxypropyl)dihydropteridine_triphosphate + 3 H2O -> 3 Orthophosphate + 3 H+ + 2-Amino-4-hydroxy-6-(D-erythro-1,2,3-trihydroxypropyl)-7,8-_dihydropteridine '	0
'7,8-dihydropteroate:L-glutamate ligase (ADP-forming)'	2.06830999999766e-06	0	1000	'ATP + Dihydropteroate + L-Glutamate -> Orthophosphate + Dihydrofolate + H+ + ADP '	0
'EX cpd00040 e'	2.06830999999766e-06	0	1000	'Glyoxylate <=> '	0
'palmitoyl-lysylphosphatidylglycerol synthesis'	2.16220000000000e-06	0	1000	'ATP + Phosphatidylglycerol_dihexadecanoyl + L-Lysine + H+ -> Palmitoyllysylphophatidylglycerol + AMP + Pyrophosphate '	0
'isohexadecanoyl-lipoteichoic acid synthesis (n=24), linked, unsubstituted'	2.20786080000000e-06	-1000	1000	'Diglucosyl-1,2_diisohexadecanoylglycerol + 24 CDP-glycerol <=> Isohexadecanoyllipoteichoic_acid (n=24), linked, unsubstituted + 24 CMP '	0
'anteisopentadecanoyl-lipoteichoic acid synthesis (n=24), linked, glucose substituted'	2.24048000000000e-06	-1000	1000	'24 UDP-glucose + Anteisopentadecanoyllipoteichoic_acid (n=24), linked, unsubstituted <=> Anteisopentadecanoyllipoteichoic_acid (n=24), linked, glucose substituted + 24 UDP '	0
'stearoyl-UDP-glucosyltransferase (triglucosyl)'	2.30204000000000e-06	-1000	1000	'Diglucosyl-1,2_distearoylglycerol + UDP-glucose <=> UDP + Triglucosyl-1,2_distearoylglycerol '	0
'isotetradecanoyl-Phosphatidylglycerophosphate phosphohydrolase'	2.32377600000000e-06	0	1000	'H2O + Diisotetradecanoylphosphatidylglycerophosphate -> Orthophosphate + H+ + Diisotetradecanoylphosphatidylglycerol '	0
'isotetradecanoyl-CDPdiacylglycerol:sn-glycerol-3-phosphate 3-phosphatidyltransferase'	2.32377600000000e-06	-1000	1000	'sn-Glycerol_3-phosphate + CDP-1,2-diisotetradecanoylglycerol <=> CMP + Diisotetradecanoylphosphatidylglycerophosphate '	0
'isotetradecanoyl-UDP-glucosyltransferase (diglucosyl)'	2.56144320000000e-06	-1000	1000	'Monoglucosyl-1,2_diisotetradecanoylglycerol + UDP-glucose <=> Diglucosyl-1,2_diisotetradecanoylglycerol + UDP '	0
'Adenosine 3'',5''-bisphosphate 3''(2'')-phosphohydrolase'	2.73109000000000e-06	0	1000	'Adenosine_3'',5''-bisphosphate + H2O -> Orthophosphate + AMP + H+ '	0
'CoA:apo-[acyl-carrier-protein] pantetheinephosphotransferase'	2.73109000000000e-06	-1000	1000	'Apo-[acyl-carrier-protein] + CoA <=> Acyl-carrier_protein + Adenosine_3'',5''-bisphosphate '	0
'isohexadecanoyl-UDP-glucosyltransferase (triglucosyl)'	3.08028000000000e-06	-1000	1000	'Diglucosyl-1,2_diisohexadecanoylglycerol + UDP-glucose <=> UDP + Triglucosyl-1,2_diisohexadecanoylglycerol '	0
'anteisoheptadecanoyl-lipoteichoic acid synthesis (n=24), unlinked, D-alanine substituted'	3.49296000000000e-06	0	1000	'24 D-Alanine + 24 ATP + Anteisoheptadecanoyllipoteichoic_acid (n=24), linked, unsubstituted -> 24 AMP + Anteisoheptadecanoyllipoteichoic_acid (n=24), linked, D-alanine substituted + 24 Pyrophosphate '	0
'isotetradecanoyl-UDP-glucosyltransferase (monoglucosyl)'	3.56464320000000e-06	-1000	1000	'1,2-Diisotetradecanoyl-sn-glycerol + UDP-glucose <=> UDP + Monoglucosyl-1,2_diisotetradecanoylglycerol '	0
'isoheptadecanoyl-lipoteichoic acid synthesis (n=24), linked, unsubstituted'	3.60088000000000e-06	-1000	1000	'Diglucosyl-1,2_diisoheptadecanoylglycerol + 24 CDP-glycerol <=> 24 CMP + Isoheptadecanoyllipoteichoic_acid (n=24), linked, unsubstituted '	0
'anteisoheptadecanoyl-lysylphosphatidylglycerol synthesis'	3.75060000000000e-06	0	1000	'Dianteisoheptadecanoylphosphatidylglycerol + ATP + L-Lysine + H+ -> Anteisoheptadecanoyllysylphophatidylglycerol + AMP + Pyrophosphate '	0
'isopentadecanoyl-lipoteichoic acid synthesis (n=24), unlinked, D-alanine substituted'	3.75744000000000e-06	0	1000	'24 D-Alanine + 24 ATP + Isopentadecanoyllipoteichoic_acid (n=24), linked, unsubstituted -> 24 AMP + Isopentadecanoyllipoteichoic_acid (n=24), linked, D-alanine substituted + 24 Pyrophosphate '	0
'5,10-Methylenetetrahydrofolate:3-methyl-2-oxobutanoate'	4.00727000000452e-06	-1000	1000	'3-Methyl-2-oxobutanoic_acid + 5,10-Methylenetetrahydrofolate + H2O <=> Tetrahydrofolate + 2-Dehydropantoate '	0
'L-Aspartate 1-carboxy-lyase'	4.00727000000452e-06	0	1000	'L-Aspartate + H+ -> beta-Alanine + CO2 '	0
'(R)-Pantoate:beta-alanine ligase (AMP-forming)'	4.00727000000452e-06	0	1000	'beta-Alanine + (R)-Pantoate + ATP -> Pantothenate + AMP + Pyrophosphate '	0
'ATP:pantothenate 4''-phosphotransferase'	4.00727000000452e-06	-1000	1000	'ATP + Pantothenate <=> D-4''-Phosphopantothenate + ADP '	0
'ATP:dephospho-CoA 3''-phosphotransferase'	4.00727000000452e-06	0	1000	'ATP + Dephospho-CoA -> ADP + CoA '	0
'N-[(R)-4''-Phosphopantothenoyl]-L-cysteine carboxy-lyase'	4.00727000000452e-06	0	1000	'(R)-4''-Phosphopantothenoyl-L-cysteine + H+ -> CO2 + Pantetheine_4''-phosphate '	0
'phosphopantothenate-cysteine ligase'	4.00727000000452e-06	0	1000	'CTP + D-4''-Phosphopantothenate + L-Cysteine -> CMP + (R)-4''-Phosphopantothenoyl-L-cysteine + Pyrophosphate '	0
'ATP:pantetheine-4''-phosphate adenylyltransferase'	4.00727000000452e-06	-1000	1000	'ATP + Pantetheine_4''-phosphate <=> Dephospho-CoA + Pyrophosphate '	0
'isopentadecanoyl-lysylphosphatidylglycerol synthesis'	4.27196000000000e-06	0	1000	'Diisopentadecanoylphosphatidylglycerol + ATP + L-Lysine + H+ -> Isopentadecanoyllysylphophatidylglycerol + AMP + Pyrophosphate '	0
'D-Glyceraldehyde:NAD+ oxidoreductase'	4.48620400000000e-06	-1000	1000	'NAD+ + H2O + D-Glyceraldehyde <=> 2 H+ + NADH + D-Glycerate '	0
'Glycerol:NAD+ oxidoreductase'	4.48620400000000e-06	-1000	1000	'NAD+ + Glycerol <=> H+ + NADH + D-Glyceraldehyde '	0
'palmitoyl-lipoteichoic acid synthesis (n=24), linked, unsubstituted'	4.74483200000000e-06	-1000	1000	'Diglucosyl-1,2_dipalmitoylglycerol + 24 CDP-glycerol <=> 24 CMP + Palmitoyllipoteichoic_acid (n=24), linked, unsubstituted '	0
'isoheptadecanoyl-UDP-glucosyltransferase (triglucosyl)'	4.91568000000000e-06	-1000	1000	'Diglucosyl-1,2_diisoheptadecanoylglycerol + UDP-glucose <=> UDP + Triglucosyl-1,2_diisoheptadecanoylglycerol '	0
'phosphatidylglycerol phosphate phosphatase (n-C14:0)'	5.08379200000000e-06	0	1000	'Phosphatidylglycerophosphate_ditetradecanoyl + H2O -> Orthophosphate + H+ + Phosphatidylglycerol_ditetradecanoyl '	0
'Phosphatidylglycerol synthase (n-C14:0)'	5.08379200000000e-06	-1000	1000	'CDP-1,2-ditetradecanoylglycerol + sn-Glycerol_3-phosphate <=> Phosphatidylglycerophosphate_ditetradecanoyl + CMP '	0
'myristoyl-UDP-glucosyltransferase (diglucosyl)'	5.35575040000000e-06	-1000	1000	'UDP-glucose + Monoglucosyl-1,2_dimyristoylglycerol <=> UDP + Diglucosyl-1,2_dimyristoylglycerol '	0
'anteisopentadecanoyl-lipoteichoic acid synthesis (n=24), unlinked, D-alanine substituted'	6.36576000000000e-06	0	1000	'24 D-Alanine + 24 ATP + H+ + Anteisopentadecanoyllipoteichoic_acid (n=24), linked, unsubstituted -> 24 AMP + 24 Pyrophosphate + Anteisopentadecanoyllipoteichoic_acid (n=24), linked, D-alanine substituted '	0
'isotetradecanoyl-phosphatidylserine decarboxylase'	6.59984000000000e-06	-1000	1000	'2 H+ + Diisotetradecanoylphosphatidylserine <=> CO2 + Diisotetradecanoylphosphatidylethanolamine '	0
'isotetradecanoyl-CDPdiacylglycerol-serine O-phosphatidyltransferase'	6.59984000000000e-06	0	1000	'CDP-1,2-diisotetradecanoylglycerol + L-Serine -> CMP + H+ + Diisotetradecanoylphosphatidylserine '	0
'palmitoyl-UDP-glucosyltransferase (triglucosyl)'	6.61884000000000e-06	-1000	1000	'Diglucosyl-1,2_dipalmitoylglycerol + UDP-glucose <=> UDP + Triglucosyl-1,2_dipalmitoylglycerol '	0
'phosphatidylglycerol phosphate phosphatase (n-C18:0)'	7.01335600000000e-06	0	1000	'Phosphatidylglycerophosphate_dioctadecanoyl + H2O -> Orthophosphate + H+ + Phosphatidylglycerol_dioctadecanoyl '	0
'Phosphatidylglycerol synthase (n-C18:0)'	7.01335600000000e-06	-1000	1000	'sn-Glycerol_3-phosphate + CDP-1,2-dioctadecanoylglycerol <=> CMP + Phosphatidylglycerophosphate_dioctadecanoyl '	0
'anteisopentadecanoyl-lysylphosphatidylglycerol synthesis'	7.23748000000000e-06	0	1000	'ATP + L-Lysine + H+ + Dianteisopentadecanoylphosphatidylglycerol -> Anteisopentadecanoyllysylphophatidylglycerol + AMP + Pyrophosphate '	0
'myristoyl-UDP-glucosyltransferase (monoglucosyl)'	7.45335040000000e-06	-1000	1000	'1,2-Diacyl-sn-glycerol_ditetradecanoyl + UDP-glucose <=> UDP + Monoglucosyl-1,2_dimyristoylglycerol '	0
'stearoyl-UDP-glucosyltransferase (diglucosyl)'	7.81608320000000e-06	-1000	1000	'Monoglucosyl-1,2_distearoylglycerol + UDP-glucose <=> UDP + Diglucosyl-1,2_distearoylglycerol '	0
'anteisoheptadecanoyl-lipoteichoic acid synthesis (n=24), linked, unsubstituted'	8.46366400000000e-06	-1000	1000	'24 CDP-glycerol + Diglucosyl-1,2_dianteisoheptadecanoylglycerol <=> 24 CMP + Anteisoheptadecanoyllipoteichoic_acid (n=24), linked, unsubstituted '	0
'isotetradecanoyl-phosphatidate cytidylyltransferase'	8.92361600000000e-06	-1000	1000	'1,2-diisotetradecanoyl-sn-glycerol_3-phosphate + CTP <=> CDP-1,2-diisotetradecanoylglycerol + Pyrophosphate '	0
'isopentenyl-diphosphate:NAD(P)+ oxidoreductase'	8.98620000000000e-06	0	1000	'NADPH + H+ + 1-Hydroxy-2-methyl-2-butenyl_4-diphosphate -> Isopentenyl_diphosphate + H2O + NADP+ '	0
'isopentadecanoyl-lipoteichoic acid synthesis (n=24), linked, unsubstituted'	9.10814400000000e-06	-1000	1000	'24 CDP-glycerol + Diglucosyl-1,2_diisopentadecanoylglycerol <=> 24 CMP + Isopentadecanoyllipoteichoic_acid (n=24), linked, unsubstituted '	0
'isohexadecanoyl-Phosphatidylglycerophosphate phosphohydrolase'	9.59135200000000e-06	0	1000	'Diisohexadecanoylphosphatidylglycerophosphate + H2O -> Orthophosphate + Diisohexadecanoylphosphatidylglycerol + H+ '	0
'isohexadecanoyl-CDPdiacylglycerol:sn-glycerol-3-phosphate 3-phosphatidyltransferase'	9.59135200000000e-06	-1000	1000	'sn-Glycerol_3-phosphate + CDP-1,2-diisohexadecanoylglycerol <=> CMP + Diisohexadecanoylphosphatidylglycerophosphate '	0
'isohexadecanoyl-UDP-glucosyltransferase (diglucosyl)'	1.04067408000000e-05	-1000	1000	'Monoglucosyl-1,2_diisohexadecanoylglycerol + UDP-glucose <=> UDP + Diglucosyl-1,2_diisohexadecanoylglycerol '	0
'CTP: 2-C-Methyl-D-erythritol 4-phosphate cytidylyltransferase'	1.04839000000000e-05	-1000	1000	'2-C-Methyl-D-erythritol_4-phosphate + CTP <=> 4-(Cytidine_5''-diphospho)-2-C-methyl-D-erythritol + Pyrophosphate '	0
'1-Deoxy-D-xylulose-5-phosphate pyruvate-lyase (carboxylating)'	1.04839000000000e-05	0	1000	'H+ + Pyruvate + D-Glyceraldehyde_3-phosphate -> CO2 + 1-Deoxy-D-xylulose_5-phosphate '	0
'ATP: 4-(Cytidine 5''-diphospho)-2-C-methyl-D-erythritol'	1.04839000000000e-05	-1000	1000	'ATP + 4-(Cytidine_5''-diphospho)-2-C-methyl-D-erythritol <=> 2-Phospho-4-(cytidine_5''-diphospho)-2-C-methyl-D-erythritol + ADP '	0
'2-Phospho-4-(cytidine 5''-diphospho)-2-C-methyl-D-erythritol'	1.04839000000000e-05	-1000	1000	'2-Phospho-4-(cytidine_5''-diphospho)-2-C-methyl-D-erythritol <=> CMP + 2-C-Methyl-D-erythritol_2,4-cyclodiphosphate '	0
'(E)-4-hydroxy-3-methylbut-2-en-1-yl-diphosphate:protein-disulfide'	1.04839000000000e-05	0	1000	'2-C-Methyl-D-erythritol_2,4-cyclodiphosphate + Protein_dithiol -> Protein_disulfide + H2O + 1-Hydroxy-2-methyl-2-butenyl_4-diphosphate '	0
'stearoyl-UDP-glucosyltransferase (monoglucosyl)'	1.07094032000000e-05	-1000	1000	'1,2-Diacyl-sn-glycerol_dioctadecanoyl + UDP-glucose <=> UDP + Monoglucosyl-1,2_distearoylglycerol '	0
'anteisoheptadecanoyl-UDP-glucosyltransferase (triglucosyl)'	1.15520000000000e-05	-1000	1000	'UDP-glucose + Diglucosyl-1,2_dianteisoheptadecanoylglycerol <=> UDP + Triglucosyl-1,2_dianteisoheptadecanoylglycerol '	0
'isotetradecanoyl-glycerol-3-phosphate O-acyltransferase'	1.24882592000000e-05	0	1000	'sn-Glycerol_3-phosphate + fa1coa -> 1-isotetradecanoyl-sn-glycerol_3-phosphate + CoA '	0
'isotetradecanoyl-1-acylglycerol-3-phosphate O-acyltransferase'	1.24882592000000e-05	0	1000	'fa1coa + 1-isotetradecanoyl-sn-glycerol_3-phosphate -> 1,2-diisotetradecanoyl-sn-glycerol_3-phosphate + CoA '	0
'NAD kinase (dGTP)'	1.28970000000029e-05	-1000	1000	'dGTP + NAD+ <=> dGDP + NADP+ '	0
'isopentadecanoyl-UDP-glucosyltransferase (triglucosyl)'	1.29960000000000e-05	-1000	1000	'UDP-glucose + Diglucosyl-1,2_diisopentadecanoylglycerol <=> UDP + Triglucosyl-1,2_diisopentadecanoylglycerol '	0
'Phosphatidylserine decarboxylase (n-C14:0)'	1.38016000000000e-05	-1000	1000	'2 H+ + phosphatidylserine_ditetradecanoyl <=> CO2 + phosphatidylethanolamine_ditetradecanoyl '	0
'Phosphatidylserine syntase (n-C14:0)'	1.38016000000000e-05	0	1000	'CDP-1,2-ditetradecanoylglycerol + L-Serine -> CMP + H+ + phosphatidylserine_ditetradecanoyl '	0
'isohexadecanoyl-UDP-glucosyltransferase (monoglucosyl)'	1.43648208000000e-05	-1000	1000	'1,2-Diisohexadecanoyl-sn-glycerol + UDP-glucose <=> Monoglucosyl-1,2_diisohexadecanoylglycerol + UDP '	0
'isoheptadecanoyl-Phosphatidylglycerophosphate phosphohydrolase'	1.51354000000000e-05	0	1000	'Diisoheptadecanoylphosphatidylglycerophosphate + H2O -> Orthophosphate + Diisoheptadecanoylphosphatidylglycerol + H+ '	0
'isoheptadecanoyl-CDPdiacylglycerol:sn-glycerol-3-phosphate 3-phosphatidyltransferase'	1.51354000000000e-05	-1000	1000	'sn-Glycerol_3-phosphate + CDP-1,2-diisoheptadecanoylglycerol <=> CMP + Diisoheptadecanoylphosphatidylglycerophosphate '	0
'anteisopentadecanoyl-lipoteichoic acid synthesis (n=24), linked, unsubstituted'	1.54307360000000e-05	-1000	1000	'Diglucosyl-1,2_dianteisopentadecanoylglycerol + 24 CDP-glycerol <=> 24 CMP + Anteisopentadecanoyllipoteichoic_acid (n=24), linked, unsubstituted '	0
'isoheptadecanoyl-UDP-glucosyltransferase (diglucosyl)'	1.66485600000000e-05	-1000	1000	'Monoglucosyl-1,2_diisoheptadecanoylglycerol + UDP-glucose <=> UDP + Diglucosyl-1,2_diisoheptadecanoylglycerol '	0
'Teichoic acid (glucose substituted) export'	1.81153600000000e-05	-1000	1000	'Peptidoglycan_polymer (n-1 subunits) + 45(Glucosyl-phosphoglyceryl)-N-Acetyl-beta-D-mannosaminyl-1,4-N-acetyl-D-glucosaminyldiphosphoundecaprenol <=> Undecaprenyl_phosphate + glycerol_teichoic acid (n=45), linked, glucose substituted '	0
'Poly(glycerol-phosphate) alpha-glucosyltransferase'	1.81153600000000e-05	-1000	1000	'45(Phosphoglyceryl)-N-Acetyl-beta-D-mannosaminyl-1,4-N-acetyl-D-glucosaminyldiphosphoundecaprenol + 45 UDP-glucose <=> 45 UDP + 45(Glucosyl-phosphoglyceryl)-N-Acetyl-beta-D-mannosaminyl-1,4-N-acetyl-D-glucosaminyldiphosphoundecaprenol '	0
'Phosphatidylserine decarboxylase (n-C18:0)'	1.88708000000000e-05	-1000	1000	'phosphatidylserine_dioctadecanoyl + 2 H+ <=> phosphatidylethanolamine_dioctadecanoyl + CO2 '	0
'Phosphatidylserine syntase (n-C18:0)'	1.88708000000000e-05	0	1000	'CDP-1,2-dioctadecanoylglycerol + L-Serine -> phosphatidylserine_dioctadecanoyl + CMP + H+ '	0
'CDP-diacylglycerol synthetase (n-C14:0)'	1.88853920000000e-05	-1000	1000	'CTP + 1,2-ditetradecanoyl-sn-glycerol_3-phosphate <=> CDP-1,2-ditetradecanoylglycerol + Pyrophosphate '	0
'phosphatidylglycerol phosphate phosphatase (n-C16:0)'	2.06115040000000e-05	0	1000	'Phosphatidylglycerophosphate_dihexadecanoyl + H2O -> Orthophosphate + Phosphatidylglycerol_dihexadecanoyl + H+ '	0
'Phosphatidylglycerol synthase (n-C16:0)'	2.06115040000000e-05	-1000	1000	'sn-Glycerol_3-phosphate + CDP-1,2-dihexadecanoylglycerol <=> CMP + Phosphatidylglycerophosphate_dihexadecanoyl '	0
'anteisopentadecanoyl-UDP-glucosyltransferase (triglucosyl)'	2.20172000000000e-05	-1000	1000	'Diglucosyl-1,2_dianteisopentadecanoylglycerol + UDP-glucose <=> Triglucosyl-1,2_dianteisopentadecanoylglycerol + UDP '	0
'palmitoyl-UDP-glucosyltransferase (diglucosyl)'	2.23608720000000e-05	-1000	1000	'Monoglucosyl-1,2_dipalmitoylglycerol + UDP-glucose <=> Diglucosyl-1,2_dipalmitoylglycerol + UDP '	0
'isoheptadecanoyl-UDP-glucosyltransferase (monoglucosyl)'	2.28927200000000e-05	-1000	1000	'1,2-Diisoheptadecanoyl-sn-glycerol + UDP-glucose <=> UDP + Monoglucosyl-1,2_diisoheptadecanoylglycerol '	0
'12-methyl-tridecanoyl-ACP:[acyl-carrier-protein] transferase'	2.49765184000000e-05	-1000	1000	'12-methyl-tridecanoyl-ACP + CoA <=> Acyl-carrier_protein + fa1coa '	0
'D-alanine-poly(phosphoribitol) ligase'	2.51104000000000e-05	0	1000	'45(Phosphoglyceryl)-N-Acetyl-beta-D-mannosaminyl-1,4-N-acetyl-D-glucosaminyldiphosphoundecaprenol + 45 D-Alanine + 45 ATP -> 45 AMP + 45 Pyrophosphate + 45(Alanyl-phosphoglyceryl)-N-Acetyl-beta-D-mannosaminyl-1,4-N-acetyl-D-glucosaminyldiphosphoundecaprenol '	0
'Teichoic acid (D-alanine substituted) export'	2.51104000000000e-05	-1000	1000	'Peptidoglycan_polymer (n-1 subunits) + 45(Alanyl-phosphoglyceryl)-N-Acetyl-beta-D-mannosaminyl-1,4-N-acetyl-D-glucosaminyldiphosphoundecaprenol <=> glycerol_teichoic acid (n=45), linked, D-ala substituted + Undecaprenyl_phosphate '	0
'CDP-diacylglycerol synthetase (n-C18:0)'	2.58841560000000e-05	-1000	1000	'CTP + 1,2-dioctadecanoyl-sn-glycerol_3-phosphate <=> CDP-1,2-dioctadecanoylglycerol + Pyrophosphate '	0
'isohexadecanoyl-phosphatidylserine decarboxylase'	2.59160000000000e-05	-1000	1000	'Diisohexadecanoylphosphatidylserine + 2 H+ <=> CO2 + Diisohexadecanoylphosphatidylethanolamine '	0
'isohexadecanoyl-CDPdiacylglycerol-serine O-phosphatidyltransferase'	2.59160000000000e-05	0	1000	'CDP-1,2-diisohexadecanoylglycerol + L-Serine -> Diisohexadecanoylphosphatidylserine + CMP + H+ '	0
'myristoyl-glycerol-3-phosphate O-acyltransferase'	2.63387424000000e-05	0	1000	'sn-Glycerol_3-phosphate + Tetradecanoyl-CoA -> 1-tetradecanoyl-sn-glycerol_3-phosphate + CoA '	0
'myristoyl-1-acylglycerol-3-phosphate O-acyltransferase'	2.63387424000000e-05	0	1000	'1-tetradecanoyl-sn-glycerol_3-phosphate + Tetradecanoyl-CoA -> CoA + 1,2-ditetradecanoyl-sn-glycerol_3-phosphate '	0
'palmitoyl-UDP-glucosyltransferase (monoglucosyl)'	3.08652720000000e-05	-1000	1000	'1,2-Diacyl-sn-glycerol_dihexadecanoyl + UDP-glucose <=> Monoglucosyl-1,2_dipalmitoylglycerol + UDP '	0
'iron (III) dicitrate transport via ABC system'	3.20900000000000e-05	0	1000	'2 Citrate + ATP + Fe3+ + H2O -> Orthophosphate + 2 Citrate + Fe3+ + H+ + ADP '	0
'TECA4S'	3.25090000000000e-05	-1000	1000	'30 UDP-N-acetyl-D-galactosamine + H2O + 30 UDP-glucose <=> 30 UMP + 30 UDP + tcam '	0
'isohexadecanoyl-phosphatidate cytidylyltransferase'	3.55073520000000e-05	-1000	1000	'CTP + 1,2-diisohexadecanoyl-sn-glycerol_3-phosphate <=> CDP-1,2-diisohexadecanoylglycerol + Pyrophosphate '	0
'anteisoheptadecanoyl-Phosphatidylglycerophosphate phosphohydrolase'	3.55763600000000e-05	0	1000	'Dianteisoheptadecanoylphosphatidylglycerophosphate + H2O -> Orthophosphate + Dianteisoheptadecanoylphosphatidylglycerol + H+ '	0
'anteisoheptadecanoyl-CDPdiacylglycerol:sn-glycerol-3-phosphate 3-phosphatidyltransferase'	3.55763600000000e-05	-1000	1000	'sn-Glycerol_3-phosphate + CDP-1,2-dianteisoheptadecanoylglycerol <=> Dianteisoheptadecanoylphosphatidylglycerophosphate + CMP '	0
'Teichoic acid (unsubstituted) export'	3.58720000000000e-05	-1000	1000	'45(Phosphoglyceryl)-N-Acetyl-beta-D-mannosaminyl-1,4-N-acetyl-D-glucosaminyldiphosphoundecaprenol + Peptidoglycan_polymer (n-1 subunits) <=> Undecaprenyl_phosphate + glycerol_teichoic acid (n=45), linked, unsubstituted '	0
'stearoyl-1-acylglycerol-3-phosphate O-acyltransferase'	3.65935592000000e-05	0	1000	'Stearoyl-CoA + 1-octadecanoyl-sn-glycerol_3-phosphate -> 1,2-dioctadecanoyl-sn-glycerol_3-phosphate + CoA '	0
'stearoyl-glycerol-3-phosphate O-acyltransferase'	3.65935592000000e-05	0	1000	'Stearoyl-CoA + sn-Glycerol_3-phosphate -> 1-octadecanoyl-sn-glycerol_3-phosphate + CoA '	0
'anteisoheptadecanoyl-UDP-glucosyltransferase (diglucosyl)'	3.91296640000000e-05	-1000	1000	'UDP-glucose + Monoglucosyl-1,2_dianteisoheptadecanoylglycerol <=> UDP + Diglucosyl-1,2_dianteisoheptadecanoylglycerol '	0
'isoheptadecanoyl-phosphatidylserine decarboxylase'	4.08044000000000e-05	-1000	1000	'2 H+ + Diisoheptadecanoylphosphatidylserine <=> CO2 + Diisoheptadecanoylphosphatidylethanolamine '	0
'isoheptadecanoyl-CDPdiacylglycerol-serine O-phosphatidyltransferase'	4.08044000000000e-05	0	1000	'L-Serine + CDP-1,2-diisoheptadecanoylglycerol -> CMP + H+ + Diisoheptadecanoylphosphatidylserine '	0
'isopentadecanoyl-Phosphatidylglycerophosphate phosphohydrolase'	4.09602000000000e-05	0	1000	'Diisopentadecanoylphosphatidylglycerophosphate + H2O -> Orthophosphate + Diisopentadecanoylphosphatidylglycerol + H+ '	0
'isopentadecanoyl-CDPdiacylglycerol:sn-glycerol-3-phosphate 3-phosphatidyltransferase'	4.09602000000000e-05	-1000	1000	'sn-Glycerol_3-phosphate + CDP-1,2-diisopentadecanoylglycerol <=> Diisopentadecanoylphosphatidylglycerophosphate + CMP '	0
'isopentadecanoyl-UDP-glucosyltransferase (diglucosyl)'	4.38021440000000e-05	-1000	1000	'Monoglucosyl-1,2_diisopentadecanoylglycerol + UDP-glucose <=> UDP + Diglucosyl-1,2_diisopentadecanoylglycerol '	0
'isohexadecanoyl-1-acylglycerol-3-phosphate O-acyltransferase'	4.98721728000000e-05	0	1000	'1-isohexadecanoyl-sn-glycerol_3-phosphate + fa6coa -> 1,2-diisohexadecanoyl-sn-glycerol_3-phosphate + CoA '	0
'isohexadecanoyl-glycerol-3-phosphate O-acyltransferase'	4.98721728000000e-05	0	1000	'sn-Glycerol_3-phosphate + fa6coa -> 1-isohexadecanoyl-sn-glycerol_3-phosphate + CoA '	0
'anteisoheptadecanoyl-UDP-glucosyltransferase (monoglucosyl)'	5.38052640000000e-05	-1000	1000	'1,2-Dianteisoheptadecanoyl-sn-glycerol + UDP-glucose <=> UDP + Monoglucosyl-1,2_dianteisoheptadecanoylglycerol '	0
'Phosphatidylserine decarboxylase (n-C16:0)'	5.56852000000000e-05	-1000	1000	'phosphatidylserine_dihexadecanoyl + 2 H+ <=> CO2 + phosphatidylethanolamine_dihexadecanoyl '	0
'Phosphatidylserine syntase (n-C16:0)'	5.56852000000000e-05	0	1000	'L-Serine + CDP-1,2-dihexadecanoylglycerol -> phosphatidylserine_dihexadecanoyl + CMP + H+ '	0
'isoheptadecanoyl-phosphatidate cytidylyltransferase'	5.59398000000000e-05	-1000	1000	'CTP + 1,2-diisoheptadecanoyl-sn-glycerol_3-phosphate <=> Pyrophosphate + CDP-1,2-diisoheptadecanoylglycerol '	0
'isopentadecanoyl-UDP-glucosyltransferase (monoglucosyl)'	6.07045440000000e-05	-1000	1000	'1,2-Diisopentadecanoyl-sn-glycerol + UDP-glucose <=> UDP + Monoglucosyl-1,2_diisopentadecanoylglycerol '	0
'anteisopentadecanoyl-Phosphatidylglycerophosphate phosphohydrolase'	6.94039600000000e-05	0	1000	'Dianteisopentadecanoylphosphatidylglycerophosphate + H2O -> Orthophosphate + H+ + Dianteisopentadecanoylphosphatidylglycerol '	0
'anteisopentadecanoyl-CDPdiacylglycerol:sn-glycerol-3-phosphate 3-phosphatidyltransferase'	6.94039600000000e-05	-1000	1000	'CDP-1,2-dianteisopentadecanoylglycerol + sn-Glycerol_3-phosphate <=> Dianteisopentadecanoylphosphatidylglycerophosphate + CMP '	0
'3-Oxooctodecanoyl-ACP:malonyl-[acyl-carrier-protein] C-acyltransferase (decarboxylating)'	7.31871183999996e-05	0	1000	'Hexadecanoyl-[acp] + H+ + Malonyl-[acyl-carrier_protein] -> Acyl-carrier_protein + CO2 + 3-Oxooctodecanoyl-ACP '	0
'3-Hydroxyoctodecanoyl-ACP:NADP+ oxidoreductase'	7.31871183999996e-05	-1000	1000	'NADPH + H+ + 3-Oxooctodecanoyl-ACP <=> 3-Hydroxyoctodecanoyl-ACP + NADP+ '	0
'trans-Octodec-2-enoyl-ACP hydro-lyase'	7.31871183999996e-05	-1000	1000	'3-Hydroxyoctodecanoyl-ACP <=> trans-Octodec-2-enoyl-ACP + H2O '	0
'Octodecanoyl-ACP:NADP+ oxidoreductase (A-specific)'	7.31871184000000e-05	0	1000	'trans-Octodec-2-enoyl-ACP + NADPH + H+ -> Octodecanoyl-ACP + NADP+ '	0
'stearyl-ACP:[acyl-carrier-protein] transferase'	7.31871184000000e-05	-1000	1000	'Octodecanoyl-ACP + CoA <=> Acyl-carrier_protein + Stearoyl-CoA '	0
'anteisopentadecanoyl-UDP-glucosyltransferase (diglucosyl)'	7.42167360000000e-05	-1000	1000	'Monoglucosyl-1,2_dianteisopentadecanoylglycerol + UDP-glucose <=> Diglucosyl-1,2_dianteisopentadecanoylglycerol + UDP '	0
'CDP-diacylglycerol synthetase (n-C16:0)'	7.62967040000000e-05	-1000	1000	'CTP + 1,2-dihexadecanoyl-sn-glycerol_3-phosphate <=> Pyrophosphate + CDP-1,2-dihexadecanoylglycerol '	0
'isoheptadecanoyl-1-acylglycerol-3-phosphate O-acyltransferase'	7.88325200000000e-05	0	1000	'fa11coa + 1-isoheptadecanoyl-sn-glycerol_3-phosphate -> 1,2-diisoheptadecanoyl-sn-glycerol_3-phosphate + CoA '	0
'isoheptadecanoyl-glycerol-3-phosphate O-acyltransferase'	7.88325200000000e-05	0	1000	'sn-Glycerol_3-phosphate + fa11coa -> CoA + 1-isoheptadecanoyl-sn-glycerol_3-phosphate '	0
'UDP-N-acetyl-D-mannosamine:N-acetyl-beta-D-'	7.90977600000000e-05	-1000	1000	'N-Acetyl-D-glucosaminyldiphosphoundecaprenol + UDP-N-acetyl-D-mannosamine <=> UDP + N-Acetyl-beta-D-mannosaminyl-1,4-N-acetyl-D-_glucosaminyldiphosphoundecaprenol '	0
'UDP-N-acetylglucosamine:undecaprenylphosphate N-acetylglucosamine -1-phosphate transferase'	7.90977600000000e-05	-1000	1000	'UDP-N-acetyl-D-glucosamine + Undecaprenyl_phosphate <=> UMP + N-Acetyl-D-glucosaminyldiphosphoundecaprenol '	0
'UDP-N-acetyl-D-glucosamine 2-epimerase'	7.90977600000000e-05	-1000	1000	'UDP-N-acetyl-D-glucosamine <=> UDP-N-acetyl-D-mannosamine '	0
'CDP-glycerol:poly(glycerophosphate) glycerophosphotransferase'	7.90977600000000e-05	-1000	1000	'N-Acetyl-beta-D-mannosaminyl-1,4-N-acetyl-D-_glucosaminyldiphosphoundecaprenol + 45 CDP-glycerol <=> 45(Phosphoglyceryl)-N-Acetyl-beta-D-mannosaminyl-1,4-N-acetyl-D-glucosaminyldiphosphoundecaprenol + 45 CMP '	0
'anteisoheptadecanoyl-phosphatidylserine decarboxylase'	9.59120000000000e-05	-1000	1000	'Dianteisoheptadecanoylphosphatidylserine + 2 H+ <=> CO2 + Dianteisoheptadecanoylphosphatidylethanolamine '	0
'anteisoheptadecanoyl-CDPdiacylglycerol-serine O-phosphatidyltransferase'	9.59120000000000e-05	0	1000	'CDP-1,2-dianteisoheptadecanoylglycerol + L-Serine -> Dianteisoheptadecanoylphosphatidylserine + CMP + H+ '	0
'14-methyl-3-oxo-pentadecanoyl-ACP:NADP+ oxidoreductase'	9.97443456000000e-05	-1000	1000	'14-methyl-3-oxo-pentadecanoyl-ACP + NADPH + H+ <=> NADP+ + 14-methyl-3-hydroxy-pentadecanoyl-ACP '	0
'12-methyl-tridecanoyl-ACP:malonyl-[acyl-carrier-protein] C-acyltransferase (decarboxylating)'	9.97443456000000e-05	0	1000	'H+ + Malonyl-[acyl-carrier_protein] + 12-methyl-tridecanoyl-ACP -> 14-methyl-3-oxo-pentadecanoyl-ACP + Acyl-carrier_protein + CO2 '	0
'14-methyl-3-hydroxy-pentadecanoyl-ACP hydro-lyase'	9.97443456000000e-05	-1000	1000	'14-methyl-3-hydroxy-pentadecanoyl-ACP <=> 14-methyl-trans-pentadec-2-enoyl-ACP + H2O '	0
'14-methyl-pentadecanoyl-ACP:[acyl-carrier-protein] transferase'	9.97443456000000e-05	-1000	1000	'14-methyl-pentadecanoyl-ACP + CoA <=> Acyl-carrier_protein + fa6coa '	0
'14-methyl-trans-pentadec-2-enoyl-ACP:NADP+ oxidoreductase (A-specific)'	9.97443456000000e-05	0	1000	'14-methyl-trans-pentadec-2-enoyl-ACP + NADPH + H+ -> 14-methyl-pentadecanoyl-ACP + NADP+ '	0
'anteisopentadecanoyl-UDP-glucosyltransferase (monoglucosyl)'	0.000102854	-1000	1000	'1,2-Dianteisopentadecanoyl-sn-glycerol + UDP-glucose <=> UDP + Monoglucosyl-1,2_dianteisopentadecanoylglycerol '	0
'palmitoyl-glycerol-3-phosphate O-acyltransferase'	0.000107162	0	1000	'Palmitoyl-CoA + sn-Glycerol_3-phosphate -> 1-hexadecanoyl-sn-glycerol_3-phosphate + CoA '	0
'palmitoyl-1-acylglycerol-3-phosphate O-acyltransferase'	0.000107162	0	1000	'Palmitoyl-CoA + 1-hexadecanoyl-sn-glycerol_3-phosphate -> 1,2-dihexadecanoyl-sn-glycerol_3-phosphate + CoA '	0
'isopentadecanoyl-phosphatidylserine decarboxylase'	0.000110884	-1000	1000	'Diisopentadecanoylphosphatidylserine + 2 H+ <=> CO2 + Diisopentadecanoylphosphatidylethanolamine '	0
'isopentadecanoyl-CDPdiacylglycerol-serine O-phosphatidyltransferase'	0.000110884	0	1000	'CDP-1,2-diisopentadecanoylglycerol + L-Serine -> Diisopentadecanoylphosphatidylserine + CMP + H+ '	0
'10-methyl-trans-undec-2-enoyl-ACP:NADP+ oxidoreductase (A-specific)'	0.000124721	0	1000	'10-methyl-trans-undec-2-enoyl-ACP + NADPH + H+ -> NADP+ + 10-methyl-undecanoyl-ACP '	0
'2-methylpropionyl-CoA:[acyl-carrier-protein] transferase'	0.000124721	-1000	1000	'2-Methylpropanoyl-CoA + Acyl-carrier_protein <=> CoA + 2-methylpropionyl-ACP '	0
'10-methyl-3-oxo-undecanoyl-ACP:NADP+ oxidoreductase'	0.000124721	-1000	1000	'NADPH + H+ + 10-methyl-3-oxo-undecanoyl-ACP <=> 10-methyl-3-hydroxy-undecanoyl-ACP + NADP+ '	0
'6-methyl-3-hydroxy-heptanoyl-ACP hydro-lyase'	0.000124721	-1000	1000	'6-methyl-3-hydroxy-heptanoyl-ACP <=> 6-methyl-trans-hept-2-enoyl-ACP + H2O '	0
'12-methyl-3-oxo-tridecanoyl-ACP:NADP+ oxidoreductase'	0.000124721	-1000	1000	'12-methyl-3-oxo-tridecanoyl-ACP + NADPH + H+ <=> 12-methyl-3-hydroxy-tridecanoyl-ACP + NADP+ '	0
'8-methyl-3-hydroxy-nonanoyl-ACP hydro-lyase'	0.000124721	-1000	1000	'8-methyl-3-hydroxy-nonanoyl-ACP <=> 8-methyl-trans-non-2-enoyl-ACP + H2O '	0
'4-methyl-trans-pent-2-enoyl-ACP:NADP+ oxidoreductase (A-specific)'	0.000124721	0	1000	'NADPH + H+ + 4-methyl-trans-pent-2-enoyl-ACP -> 4-methyl-pentanoyl-ACP + NADP+ '	0
'4-methyl-pentanoyl-ACP:malonyl-[acyl-carrier-protein] C-acyltransferase (decarboxylating)'	0.000124721	0	1000	'4-methyl-pentanoyl-ACP + H+ + Malonyl-[acyl-carrier_protein] -> Acyl-carrier_protein + CO2 + 6-methyl-3-oxo-heptanoyl-ACP '	0
'12-methyl-trans-tridec-2-enoyl-ACP:NADP+ oxidoreductase (A-specific)'	0.000124721	0	1000	'12-methyl-trans-tridec-2-enoyl-ACP + NADPH + H+ -> 12-methyl-tridecanoyl-ACP + NADP+ '	0
'4-methyl-3-oxo-pentanoyl-ACP:NADP+ oxidoreductase'	0.000124721	-1000	1000	'4-methyl-3-oxo-pentanoyl-ACP + NADPH + H+ <=> 4-methyl-3-hydroxy-pentanoyl-ACP + NADP+ '	0
'6-methyl-trans-hept-2-enoyl-ACP:NADP+ oxidoreductase (A-specific)'	0.000124721	0	1000	'6-methyl-trans-hept-2-enoyl-ACP + NADPH + H+ -> 6-methyl-heptanoyl-ACP + NADP+ '	0
'6-methyl-heptanoyl-ACP:malonyl-[acyl-carrier-protein] C-acyltransferase (decarboxylating)'	0.000124721	0	1000	'6-methyl-heptanoyl-ACP + H+ + Malonyl-[acyl-carrier_protein] -> Acyl-carrier_protein + 8-methyl-3-oxo-nonanoyl-ACP + CO2 '	0
'10-methyl-undecanoyl-ACP:malonyl-[acyl-carrier-protein] C-acyltransferase (decarboxylating)'	0.000124721	0	1000	'H+ + Malonyl-[acyl-carrier_protein] + 10-methyl-undecanoyl-ACP -> Acyl-carrier_protein + 12-methyl-3-oxo-tridecanoyl-ACP + CO2 '	0
'8-methyl-nonanoyl-ACP:malonyl-[acyl-carrier-protein] C-acyltransferase (decarboxylating)'	0.000124721	0	1000	'8-methyl-nonanoyl-ACP + H+ + Malonyl-[acyl-carrier_protein] -> Acyl-carrier_protein + CO2 + 10-methyl-3-oxo-undecanoyl-ACP '	0
'12-methyl-3-hydroxy-tridecanoyl-ACP hydro-lyase'	0.000124721	-1000	1000	'12-methyl-3-hydroxy-tridecanoyl-ACP <=> 12-methyl-trans-tridec-2-enoyl-ACP + H2O '	0
'2-methylpropionyl-ACP:malonyl-[acyl-carrier-protein] C-acyltransferase (decarboxylating)'	0.000124721	0	1000	'H+ + Malonyl-[acyl-carrier_protein] + 2-methylpropionyl-ACP -> Acyl-carrier_protein + 4-methyl-3-oxo-pentanoyl-ACP + CO2 '	0
'8-methyl-trans-non-2-enoyl-ACP:NADP+ oxidoreductase (A-specific)'	0.000124721	0	1000	'8-methyl-trans-non-2-enoyl-ACP + NADPH + H+ -> 8-methyl-nonanoyl-ACP + NADP+ '	0
'6-methyl-3-oxo-heptanoyl-ACP:NADP+ oxidoreductase'	0.000124721	-1000	1000	'NADPH + H+ + 6-methyl-3-oxo-heptanoyl-ACP <=> 6-methyl-3-hydroxy-heptanoyl-ACP + NADP+ '	0
'10-methyl-3-hydroxy-undecanoyl-ACP hydro-lyase'	0.000124721	-1000	1000	'10-methyl-3-hydroxy-undecanoyl-ACP <=> 10-methyl-trans-undec-2-enoyl-ACP + H2O '	0
'8-methyl-3-oxo-nonanoyl-ACP:NADP+ oxidoreductase'	0.000124721	-1000	1000	'8-methyl-3-oxo-nonanoyl-ACP + NADPH + H+ <=> 8-methyl-3-hydroxy-nonanoyl-ACP + NADP+ '	0
'4-methyl-3-hydroxy-pentanoyl-ACP hydro-lyase'	0.000124721	-1000	1000	'4-methyl-3-hydroxy-pentanoyl-ACP <=> H2O + 4-methyl-trans-pent-2-enoyl-ACP '	0
'anteisoheptadecanoyl-phosphatidate cytidylyltransferase'	0.000131488	-1000	1000	'CTP + 1,2-dianteisoheptadecanoyl-sn-glycerol_3-phosphate <=> CDP-1,2-dianteisoheptadecanoylglycerol + Pyrophosphate '	0
'isopentadecanoyl-phosphatidate cytidylyltransferase'	0.000151844	-1000	1000	'CTP + 1,2-diisopentadecanoyl-sn-glycerol_3-phosphate <=> CDP-1,2-diisopentadecanoylglycerol + Pyrophosphate '	0
'15-methyl-3-hydroxy-hexa-decanoyl-ACP hydro-lyase'	0.000157665	-1000	1000	'15-methyl-3-hydroxy-hexa-decanoyl-ACP <=> 15-methyl-trans-hexa-dec-2-enoyl-ACP + H2O '	0
'15-methyl-3-oxo-hexa-decanoyl-ACP:NADP+ oxidoreductase'	0.000157665	-1000	1000	'15-methyl-3-oxo-hexa-decanoyl-ACP + NADPH + H+ <=> 15-methyl-3-hydroxy-hexa-decanoyl-ACP + NADP+ '	0
'13-methyl-tetra-decanoyl-ACP:malonyl-[acyl-carrier-protein] C-acyltransferase (decarboxylating)'	0.000157665	0	1000	'13-methyl-tetra-decanoyl-ACP + H+ + Malonyl-[acyl-carrier_protein] -> 15-methyl-3-oxo-hexa-decanoyl-ACP + Acyl-carrier_protein + CO2 '	0
'15-methyl-hexa-decanoyl-ACP:[acyl-carrier-protein] transferase'	0.000157665	-1000	1000	'15-methyl-hexa-decanoyl-ACP + CoA <=> Acyl-carrier_protein + fa11coa '	0
'15-methyl-trans-hexa-dec-2-enoyl-ACP:NADP+ oxidoreductase (A-specific)'	0.000157665	0	1000	'15-methyl-trans-hexa-dec-2-enoyl-ACP + NADPH + H+ -> 15-methyl-hexa-decanoyl-ACP + NADP+ '	0
'2''-Deoxycytidine diphosphate:oxidized-thioredoxin 2''-oxidoreductase'	0.000173784	0	1000	'CDP + trdrd -> trdox + dCDP + H2O '	0
'Ribonucleotide reductase: GDP'	0.000173992	0	1000	'trdrd + GDP -> trdox + dGDP + H2O '	0
'anteisoheptadecanoyl-1-acylglycerol-3-phosphate O-acyltransferase'	0.000185294	0	1000	'1-anteisoheptadecanoyl-sn-glycerol_3-phosphate + fa12coa -> CoA + 1,2-dianteisoheptadecanoyl-sn-glycerol_3-phosphate '	0
'anteisoheptadecanoyl-glycerol-3-phosphate O-acyltransferase'	0.000185294	0	1000	'sn-Glycerol_3-phosphate + fa12coa -> 1-anteisoheptadecanoyl-sn-glycerol_3-phosphate + CoA '	0
'anteisopentadecanoyl-CDPdiacylglycerol-serine O-phosphatidyltransferase'	0.000187948	0	1000	'CDP-1,2-dianteisopentadecanoylglycerol + L-Serine -> CMP + H+ + Dianteisopentadecanoylphosphatidylserine '	0
'anteisopentadecanoyl-phosphatidylserine decarboxylase'	0.000187948	-1000	1000	'2 H+ + Dianteisopentadecanoylphosphatidylserine <=> Dianteisopentadecanoylphosphatidylethanolamine + CO2 '	0
'ATP:nicotinamide-nucleotide adenylyltransferase'	0.000195097	-1000	1000	'ATP + Nicotinate_D-ribonucleotide <=> Deamino-NAD+ + Pyrophosphate '	0
'Deamino-NAD+:ammonia ligase (AMP-forming)'	0.000195097	0	1000	'ATP + NH3 + Deamino-NAD+ -> AMP + NAD+ + Pyrophosphate '	0
'quinolinate synthase'	0.000195097	0	1000	'Glycerone_phosphate + Iminoaspartate -> Orthophosphate + H+ + Pyridine-2,3-dicarboxylate + 2 H2O '	0
'Nicotinate-nucleotide:pyrophosphate phosphoribosyltransferase'	0.000195097	0	1000	'5-Phospho-alpha-D-ribose_1-diphosphate + 2 H+ + Pyridine-2,3-dicarboxylate -> CO2 + Pyrophosphate + Nicotinate_D-ribonucleotide '	0
'L-aspartate oxidase'	0.000195097	0	1000	'L-Aspartate + Oxygen -> H+ + Iminoaspartate + H2O2 '	0
'isopentadecanoyl-1-acylglycerol-3-phosphate O-acyltransferase'	0.000212549	0	1000	'1-isopentadecanoyl-sn-glycerol_3-phosphate + fa3coa -> CoA + 1,2-diisopentadecanoyl-sn-glycerol_3-phosphate '	0
'isopentadecanoyl-glycerol-3-phosphate O-acyltransferase'	0.000212549	0	1000	'sn-Glycerol_3-phosphate + fa3coa -> 1-isopentadecanoyl-sn-glycerol_3-phosphate + CoA '	0
'5,10-methylenetetrahydrofolate,FADH2:dUMP C-methyltransferase'	0.000228982	-1000	1000	'dUMP + 5,10-Methylenetetrahydrofolate + FADH2 <=> Tetrahydrofolate + dTMP + FAD '	0
'ATP:dTMP phosphotransferase'	0.000228982	-1000	1000	'ATP + dTMP <=> dTDP + ADP '	0
'2''-Deoxyuridine 5''-diphosphate:oxidized-thioredoxin'	0.000228982	0	1000	'UDP + trdrd -> trdox + H2O + dUDP '	0
'Ribonucleotide reductase: ADP'	0.00022984	0	1000	'trdrd + ADP -> trdox + dADP + H2O '	0
'anteisopentadecanoyl-phosphatidate cytidylyltransferase'	0.000257352	-1000	1000	'CTP + 1,2-dianteisopentadecanoyl-sn-glycerol_3-phosphate <=> CDP-1,2-dianteisopentadecanoylglycerol + Pyrophosphate '	0
'DNA synthesis'	0.00026	-1000	1000	'0.8807 dTTP + 0.6692 dGTP + 0.6684 dCTP + 0.884 dATP <=> DNA + 3.1023 Pyrophosphate '	0
'acyl-CoA dehydrogenase (hexadecanoyl-CoA)'	0.000287511	0	1000	'H+ + NADH + trans-Hexadec-2-enoyl-CoA -> Palmitoyl-CoA + NAD+ '	0
'myristoyl-CoA:acetylCoA C-myristoyltransferase'	0.000287511	-1000	1000	'Tetradecanoyl-CoA + Acetyl-CoA <=> 3-Oxopalmitoyl-CoA + CoA '	0
'(S)-3-Hydroxyhexadecanoyl-CoA hydro-lyase'	0.000287511	-1000	1000	'(S)-3-Hydroxyhexadecanoyl-CoA <=> H2O + trans-Hexadec-2-enoyl-CoA '	0
'Lipoteichoic acid biosynthesis'	0.000304	-1000	1000	'0.002339 Stearoyllipoteichoic_acid (n=24), linked, D-alanine substituted + 0.001761 Stearoyllipoteichoic_acid (n=24), linked, unsubstituted + 0.0002227 Isotetradecanoyllipoteichoic_acid (n=24), linked, N-acetyl-D-glucosamine + 0.00435 Isopentadecanoyllipoteichoic_acid (n=24), linked, glucose substituted + 0.00737 Anteisopentadecanoyllipoteichoic_acid (n=24), linked, glucose substituted + 0.00052…	0
'acyl-CoA dehydrogenase (octanoyl-CoA)'	0.000340189	0	1000	'trans-Oct-2-enoyl-CoA + H+ + NADH -> Octanoyl-CoA + NAD+ '	0
'Hexanoyl-CoA:acetyl-CoA C-acyltransferase'	0.000340189	-1000	1000	'Hexanoyl-CoA + Acetyl-CoA <=> 3-Oxooctanoyl-CoA + CoA '	0
'(S)-3-Hydroxytetradecanoyl-CoA hydro-lyase'	0.000340189	-1000	1000	'(S)-3-Hydroxytetradecanoyl-CoA <=> trans-Tetradec-2-enoyl-CoA + H2O '	0
'acyl-CoA dehydrogenase (dodecanoyl-CoA)'	0.000340189	0	1000	'2-trans-Dodecenoyl-CoA + H+ + NADH -> NAD+ + Lauroyl-CoA '	0
'Lauroyl-CoA:acetyl-CoA C-acyltransferase'	0.000340189	-1000	1000	'Acetyl-CoA + Lauroyl-CoA <=> 3-Oxotetradecanoyl-CoA + CoA '	0
'acyl-CoA dehydrogenase (tetradecanoyl-CoA)'	0.000340189	0	1000	'trans-Tetradec-2-enoyl-CoA + H+ + NADH -> Tetradecanoyl-CoA + NAD+ '	0
'(S)-Hydroxyhexanoyl-CoA hydro-lyase'	0.000340189	-1000	1000	'(S)-Hydroxyhexanoyl-CoA <=> trans-Hex-2-enoyl-CoA + H2O '	0
'(S)-Hydroxydecanoyl-CoA hydro-lyase'	0.000340189	-1000	1000	'(S)-Hydroxydecanoyl-CoA <=> trans-Dec-2-enoyl-CoA + H2O '	0
'Acetyl-CoA:acetyl-CoA C-acetyltransferase'	0.000340189	-1000	1000	'Acetyl-CoA + Butanoyl-CoA <=> 3-Oxohexanoyl-CoA + CoA '	0
'Decanoyl-CoA:acetyl-CoA C-acyltransferase'	0.000340189	-1000	1000	'Acetyl-CoA + Decanoyl-CoA <=> CoA + 3-Oxododecanoyl-CoA '	0
'(S)-3-Hydroxydodecanoyl-CoA hydro-lyase'	0.000340189	-1000	1000	'(S)-3-Hydroxydodecanoyl-CoA <=> 2-trans-Dodecenoyl-CoA + H2O '	0
'(S)-Hydroxyoctanoyl-CoA hydro-lyase'	0.000340189	-1000	1000	'(S)-Hydroxyoctanoyl-CoA <=> trans-Oct-2-enoyl-CoA + H2O '	0
'acyl-CoA dehydrogenase (decanoyl-CoA)'	0.000340189	0	1000	'trans-Dec-2-enoyl-CoA + H+ + NADH -> NAD+ + Decanoyl-CoA '	0
'acyl-CoA dehydrogenase (hexanoyl-CoA)'	0.000340189	0	1000	'trans-Hex-2-enoyl-CoA + H+ + NADH -> Hexanoyl-CoA + NAD+ '	0
'Octanoyl-CoA:acetyl-CoA C-acyltransferase'	0.000340189	-1000	1000	'Octanoyl-CoA + Acetyl-CoA <=> 3-Oxodecanoyl-CoA + CoA '	0
'2-Methylpropanoyl-CoA CoA-carbonylmutase'	0.000340189	-1000	1000	'2-Methylpropanoyl-CoA <=> Butanoyl-CoA '	0
'anteisopentadecanoyl-glycerol-3-phosphate O-acyltransferase'	0.000360205	0	1000	'sn-Glycerol_3-phosphate + fa4coa -> 1-anteisopentadecanoyl-sn-glycerol_3-phosphate + CoA '	0
'anteisopentadecanoyl-1-acylglycerol-3-phosphate O-acyltransferase'	0.000360205	0	1000	'fa4coa + 1-anteisopentadecanoyl-sn-glycerol_3-phosphate -> 1,2-dianteisopentadecanoyl-sn-glycerol_3-phosphate + CoA '	0
'14-methyl-3-hydroxy-hexa-decanoyl-ACP hydro-lyase'	0.000370587	-1000	1000	'14-methyl-3-hydroxy-hexa-decanoyl-ACP <=> 14-methyl-trans-hexa-dec-2-enoyl-ACP + H2O '	0
'12-methyl-tetra-decanoyl-ACP:malonyl-[acyl-carrier-protein] C-acyltransferase (decarboxylating)'	0.000370587	0	1000	'12-methyl-tetra-decanoyl-ACP + H+ + Malonyl-[acyl-carrier_protein] -> Acyl-carrier_protein + CO2 + 14-methyl-3-oxo-hexa-decanoyl-ACP '	0
'14-methyl-3-oxo-hexa-decanoyl-ACP:NADP+ oxidoreductase'	0.000370587	-1000	1000	'NADPH + 14-methyl-3-oxo-hexa-decanoyl-ACP + H+ <=> 14-methyl-3-hydroxy-hexa-decanoyl-ACP + NADP+ '	0
'14-methyl-trans-hexa-dec-2-enoyl-ACP:NADP+ oxidoreductase (A-specific)'	0.000370587	0	1000	'14-methyl-trans-hexa-dec-2-enoyl-ACP + NADPH + H+ -> 14-methyl-hexa-decanoyl-ACP + NADP+ '	0
'14-methyl-hexa-decanoyl-ACP:[acyl-carrier-protein] transferase'	0.000370587	-1000	1000	'14-methyl-hexa-decanoyl-ACP + CoA <=> Acyl-carrier_protein + fa12coa '	0
'13-methyl-tetra-decanoyl-ACP:[acyl-carrier-protein] transferase'	0.000425097	-1000	1000	'13-methyl-tetra-decanoyl-ACP + CoA <=> Acyl-carrier_protein + fa3coa '	0
'rxn07430'	0.000464909	0	1000	'3-Methyl-2-oxobutanoic_acid + H+ + Thiamin_diphosphate -> CO2 + 2-Methyl-1-hydroxypropyl-ThPP '	0
'rxn07431'	0.000464909	-1000	1000	'2-Methyl-1-hydroxypropyl-ThPP + Lipoamide <=> S-(2-Methylpropanoyl)-dihydrolipoamide + Thiamin_diphosphate '	0
'N-(5-Phospho-beta-D-ribosyl)anthranilate ketol-isomerase'	0.000543195	-1000	1000	'N-(5-Phospho-D-ribosyl)anthranilate <=> 1-(2-Carboxyphenylamino)-1''-deoxy-D-ribulose_5''-phosphate '	0
'1-(2-Carboxyphenylamino)-1-deoxy-D-ribulose-5-phosphate'	0.000543195	0	1000	'1-(2-Carboxyphenylamino)-1''-deoxy-D-ribulose_5''-phosphate + H+ -> CO2 + Indoleglycerol_phosphate + H2O '	0
'L-Serine hydro-lyase (adding indoleglycerol-phosphate)'	0.000543195	-1000	1000	'Indoleglycerol_phosphate + L-Serine <=> L-Tryptophan + H2O + D-Glyceraldehyde_3-phosphate '	0
'N-(5-Phospho-D-ribosyl)anthranilate:pyrophosphate'	0.000543195	0	1000	'5-Phospho-alpha-D-ribose_1-diphosphate + Anthranilate -> Pyrophosphate + N-(5-Phospho-D-ribosyl)anthranilate '	0
'Chorismate pyruvate-lyase (amino-accepting)'	0.000543195	0	1000	'Chorismate + NH3 -> H+ + Pyruvate + Anthranilate + H2O '	0
'UTP:ammonia ligase(ADP-forming)'	0.000577715	-1000	1000	'ATP + UTP + NH3 <=> Orthophosphate + CTP + 2 H+ + ADP '	0
'3-methylbutanoyl-CoA:[acyl-carrier-protein] transferase'	0.000582763	-1000	1000	'Acyl-carrier_protein + 3-Methylbutanoyl-CoA <=> 3-methylbutanoyl-ACP + CoA '	0
'5-methyl-3-hydroxy-hexanoyl-ACP hydro-lyase'	0.000582763	-1000	1000	'5-methyl-3-hydroxy-hexanoyl-ACP <=> H2O + 5-methyl-trans-hex-2-enoyl-ACP '	0
'3-Methylbutanoyl-CoA:(acceptor) 2,3-oxidoreductase'	0.000582763	0	1000	'FADH2 + 3-Methylcrotonyl-CoA -> 3-Methylbutanoyl-CoA + FAD '	0
'5-methyl-trans-hex-2-enoyl-ACP:NADP+ oxidoreductase (A-specific)'	0.000582763	0	1000	'NADPH + H+ + 5-methyl-trans-hex-2-enoyl-ACP -> NADP+ + 5-methyl-hexanoyl-ACP '	0
'5-methyl-3-oxo-hexanoyl-ACP:NADP+ oxidoreductase'	0.000582763	-1000	1000	'5-methyl-3-oxo-hexanoyl-ACP + NADPH + H+ <=> 5-methyl-3-hydroxy-hexanoyl-ACP + NADP+ '	0
'Acetyl-CoA:acetyl-CoA C-acetyltransferase'	0.000582763	-1000	1000	'2 Acetyl-CoA <=> CoA + Acetoacetyl-CoA '	0
'7-methyl-trans-oct-2-enoyl-ACP:NADP+ oxidoreductase (A-specific)'	0.000582763	0	1000	'7-methyl-trans-oct-2-enoyl-ACP + NADPH + H+ -> 7-methyl-octanoyl-ACP + NADP+ '	0
'(S)-3-Hydroxy-3-methylglutaryl-CoA hydro-lyase'	0.000582763	-1000	1000	'(S)-3-Hydroxy-3-methylglutaryl-CoA <=> H2O + 3-Methylglutaconyl-CoA '	0
'5-methyl-hexanoyl-ACP:malonyl-[acyl-carrier-protein] C-acyltransferase (decarboxylating)'	0.000582763	0	1000	'H+ + Malonyl-[acyl-carrier_protein] + 5-methyl-hexanoyl-ACP -> Acyl-carrier_protein + CO2 + 7-methyl-3-oxo-octanoyl-ACP '	0
'7-methyl-octanoyl-ACP:malonyl-[acyl-carrier-protein] C-acyltransferase (decarboxylating)'	0.000582763	0	1000	'7-methyl-octanoyl-ACP + H+ + Malonyl-[acyl-carrier_protein] -> 9-methyl-3-oxo-decanoyl-ACP + Acyl-carrier_protein + CO2 '	0
'7-methyl-3-hydroxy-octanoyl-ACP hydro-lyase'	0.000582763	-1000	1000	'7-methyl-3-hydroxy-octanoyl-ACP <=> 7-methyl-trans-oct-2-enoyl-ACP + H2O '	0
'3-methylbutanoyl-ACP:malonyl-[acyl-carrier-protein] C-acyltransferase (decarboxylating)'	0.000582763	0	1000	'H+ + 3-methylbutanoyl-ACP + Malonyl-[acyl-carrier_protein] -> 5-methyl-3-oxo-hexanoyl-ACP + Acyl-carrier_protein + CO2 '	0
'7-methyl-3-oxo-octanoyl-ACP:NADP+ oxidoreductase'	0.000582763	-1000	1000	'7-methyl-3-oxo-octanoyl-ACP + NADPH + H+ <=> 7-methyl-3-hydroxy-octanoyl-ACP + NADP+ '	0
'11-methyl-3-hydroxy-dodecanoyl-ACP hydro-lyase'	0.000582763	-1000	1000	'11-methyl-3-hydroxy-dodecanoyl-ACP <=> 11-methyl-trans-dodec-2-enoyl-ACP + H2O '	0
'Butanoyl-CoA:acetate CoA-transferase'	0.000582763	-1000	1000	'Acetate + Butanoyl-CoA <=> Butanoic_acid + Acetyl-CoA '	0
'9-methyl-3-hydroxy-decanoyl-ACP hydro-lyase'	0.000582763	-1000	1000	'9-methyl-3-hydroxy-decanoyl-ACP <=> 9-methyl-trans-dec-2-enoyl-ACP + H2O '	0
'9-methyl-decanoyl-ACP:malonyl-[acyl-carrier-protein] C-acyltransferase (decarboxylating)'	0.000582763	0	1000	'H+ + Malonyl-[acyl-carrier_protein] + 9-methyl-decanoyl-ACP -> Acyl-carrier_protein + 11-methyl-3-oxo-dodecanoyl-ACP + CO2 '	0
'11-methyl-3-oxo-dodecanoyl-ACP:NADP+ oxidoreductase'	0.000582763	-1000	1000	'11-methyl-3-oxo-dodecanoyl-ACP + NADPH + H+ <=> 11-methyl-3-hydroxy-dodecanoyl-ACP + NADP+ '	0
'9-methyl-3-oxo-decanoyl-ACP:NADP+ oxidoreductase'	0.000582763	-1000	1000	'9-methyl-3-oxo-decanoyl-ACP + NADPH + H+ <=> 9-methyl-3-hydroxy-decanoyl-ACP + NADP+ '	0
'9-methyl-trans-dec-2-enoyl-ACP:NADP+ oxidoreductase (A-specific)'	0.000582763	0	1000	'9-methyl-trans-dec-2-enoyl-ACP + NADPH + H+ -> NADP+ + 9-methyl-decanoyl-ACP '	0
'11-methyl-dodecanoyl-ACP:malonyl-[acyl-carrier-protein] C-acyltransferase (decarboxylating)'	0.000582763	0	1000	'11-methyl-dodecanoyl-ACP + H+ + Malonyl-[acyl-carrier_protein] -> Acyl-carrier_protein + CO2 + 13-methyl-3-oxo-tetra-decanoyl-ACP '	0
'11-methyl-trans-dodec-2-enoyl-ACP:NADP+ oxidoreductase (A-specific)'	0.000582763	0	1000	'11-methyl-trans-dodec-2-enoyl-ACP + NADPH + H+ -> 11-methyl-dodecanoyl-ACP + NADP+ '	0
'13-methyl-3-hydroxy-tetra-decanoyl-ACP hydro-lyase'	0.000582763	-1000	1000	'13-methyl-3-hydroxy-tetra-decanoyl-ACP <=> 13-methyl-trans-tetra-dec-2-enoyl-ACP + H2O '	0
'13-methyl-3-oxo-tetra-decanoyl-ACP:NADP+ oxidoreductase'	0.000582763	-1000	1000	'NADPH + 13-methyl-3-oxo-tetra-decanoyl-ACP + H+ <=> 13-methyl-3-hydroxy-tetra-decanoyl-ACP + NADP+ '	0
'13-methyl-trans-tetra-dec-2-enoyl-ACP:NADP+ oxidoreductase (A-specific)'	0.000582763	0	1000	'NADPH + H+ + 13-methyl-trans-tetra-dec-2-enoyl-ACP -> 13-methyl-tetra-decanoyl-ACP + NADP+ '	0
'mRNA synthesis'	0.000655	-1000	1000	'0.5853 CTP + 0.7706 ATP + 0.6331 UTP + 0.9496 GTP <=> mRNA + 2.9386 Pyrophosphate '	0
'12-methyl-tetra-decanoyl-ACP:[acyl-carrier-protein] transferase'	0.000720411	-1000	1000	'12-methyl-tetra-decanoyl-ACP + CoA <=> Acyl-carrier_protein + fa4coa '	0
'Lipid composition reaction (B. subtilis)'	0.00076	-1000	1000	'0.2473 Dianteisopentadecanoylphosphatidylethanolamine + 0.001682 Diglucosyl-1,2_diisotetradecanoylglycerol + 0.001002 Triglucosyl-1,2_diisotetradecanoylglycerol + 0.002845 Palmitoyllysylphophatidylglycerol + 0.03982 Dianteisoheptadecanoylphosphatidylglycerol + 0.01119 Monoglucosyl-1,2_dipalmitoylglycerol + 0.01447 Diglucosyl-1,2_dipalmitoylglycerol + 0.02897 Triglucosyl-1,2_dianteisopentadecanoy…	0
'ATP:(d)GMP phosphotransferase'	0.000805146	-1000	1000	'ATP + GMP <=> ADP + GDP '	0
'IMP:NAD+ oxidoreductase'	0.000811085	-1000	1000	'NAD+ + H2O + IMP <=> Xanthosine_5''-phosphate + H+ + NADH '	0
'Xanthosine-5''-phosphate:ammonia ligase (AMP-forming)'	0.000811085	-1000	1000	'Xanthosine_5''-phosphate + ATP + NH3 <=> AMP + GMP + H+ + Pyrophosphate '	0
'L-Histidinol-phosphate phosphohydrolase'	0.000816906	0	1000	'L-Histidinol_phosphate + H2O -> Orthophosphate + H+ + L-Histidinol '	0
'D-erythro-1-(Imidazol-4-yl)glycerol 3-phosphate hydro-lyase'	0.000816906	0	1000	'D-erythro-1-(Imidazol-4-yl)glycerol_3-phosphate -> H2O + 3-(Imidazol-4-yl)-2-oxopropyl_phosphate '	0
'Imidazole-glycerol-3-phosphate synthase'	0.000816906	0	1000	'N-(5''-Phospho-D-1''-ribulosylformimino)-5-amino-1-(5''''-phospho-D-_ribosyl)-4-imidazolecarboxamide + L-Glutamine -> 1-(5''-Phosphoribosyl)-5-amino-4-imidazolecarboxamide + H+ + D-erythro-1-(Imidazol-4-yl)glycerol_3-phosphate + L-Glutamate '	0
'L-Histidinal:NAD+ oxidoreductase'	0.000816906	-1000	1000	'L-Histidinal + NAD+ + H2O <=> L-Histidine + 2 H+ + NADH '	0
'L-Histidinol:NAD+ oxidoreductase'	0.000816906	-1000	1000	'NAD+ + L-Histidinol <=> L-Histidinal + H+ + NADH '	0
'Phosphoribosyl-ATP pyrophosphohydrolase'	0.000816906	0	1000	'Phosphoribosyl-ATP + H2O -> Phosphoribosyl-AMP + Pyrophosphate '	0
'N-(5''-Phospho-D-ribosylformimino)-5-amino-1-'	0.000816906	-1000	1000	'5-(5-Phospho-D-ribosylaminoformimino)-1-(5-phosphoribosyl)-_imidazole-4-carboxamide <=> N-(5''-Phospho-D-1''-ribulosylformimino)-5-amino-1-(5''''-phospho-D-_ribosyl)-4-imidazolecarboxamide '	0
'1-(5-phospho-D-ribosyl)-AMP 1,6-hydrolase'	0.000816906	-1000	1000	'Phosphoribosyl-AMP + H2O <=> 5-(5-Phospho-D-ribosylaminoformimino)-1-(5-phosphoribosyl)-_imidazole-4-carboxamide '	0
'1-(5-Phospho-D-ribosyl)-ATP:pyrophosphate phosphoribosyl-transferase'	0.000816906	0	1000	'5-Phospho-alpha-D-ribose_1-diphosphate + ATP -> Phosphoribosyl-ATP + Pyrophosphate '	0
'Citrate-Mg2+:H+ symporter'	0.0009474	-1000	1000	'Citrate + Magnesium + H+ <=> Citrate + Magnesium + H+ '	0
'EX cpd00029 e'	0.000958635	0	1000	'Acetate <=> '	0
'UDP-N-acetyl-D-glucosamine 4-epimerase'	0.00097527	-1000	1000	'UDP-N-acetyl-D-glucosamine <=> UDP-N-acetyl-D-galactosamine '	0
'Peptidoglycan subunit synthesis'	0.00101563	-1000	1000	'Peptidoglycan_polymer (n-1 subunits) + Undecaprenyl-diphospho-N-acetylmuramoyl-(N-acetylglucosamine)-L-_alanyl-D-glutamyl-meso-2,6-diaminopimeloyl-D-alanyl-D-alanine <=> Undecaprenyl_diphosphate + Peptidoglycan_polymer (n subunits) '	0
'Undecaprenyl-diphosphate phosphohydrolase'	0.00101563	0	1000	'Undecaprenyl_diphosphate + H2O -> Orthophosphate + Undecaprenyl_phosphate + H+ '	0
'UDPMurAc(oyl-L-Ala-D-gamma-Glu-L-Lys-D-Ala-D-Ala):undecaprenyl-'	0.00101563	-1000	1000	'UDP-N-acetylmuramoyl-L-alanyl-D-glutamyl-6-carboxy-L-lysyl-D-alanyl-_D-alanine + Undecaprenyl_phosphate <=> UMP + Undecaprenyl-diphospho-N-acetylmuramoyl-L-alanyl-D-glutamyl-meso-_2,6-diaminopimeloyl-D-alanyl-D-alanine '	0
'UDP-N-acetylglucosamine-N-acetylmuramyl-(pentapeptide)pyrophosphoryl-undecaprenol N-acetylglucosamine transferase'	0.00101563	-1000	1000	'UDP-N-acetyl-D-glucosamine + Undecaprenyl-diphospho-N-acetylmuramoyl-L-alanyl-D-glutamyl-meso-_2,6-diaminopimeloyl-D-alanyl-D-alanine <=> UDP + Undecaprenyl-diphospho-N-acetylmuramoyl-(N-acetylglucosamine)-L-_alanyl-D-glutamyl-meso-2,6-diaminopimeloyl-D-alanyl-D-alanine '	0
'UDP-N-acetylmuramoyl-L-alanyl-D-glutamate:meso-2,6-'	0.00101563	0	1000	'UDP-N-acetylmuramoyl-L-alanyl-D-glutamate + ATP + meso-2,6-Diaminoheptanedioate -> Orthophosphate + UDP-N-acetylmuramoyl-L-alanyl-D-gamma-glutamyl-meso-2,6-_diaminopimelate + H+ + ADP '	0
'UDP-N-acetylmuramoyl-L-alanyl-D-glutamyl-meso-2,6-'	0.00101563	0	1000	'UDP-N-acetylmuramoyl-L-alanyl-D-gamma-glutamyl-meso-2,6-_diaminopimelate + D-Alanyl-D-alanine + ATP -> UDP-N-acetylmuramoyl-L-alanyl-D-glutamyl-6-carboxy-L-lysyl-D-alanyl-_D-alanine + Orthophosphate + H+ + ADP '	0
'L-Glutamate racemase'	0.00101563	-1000	1000	'L-Glutamate <=> D-Glutamate '	0
'UDP-N-acetylmuramate:L-alanine ligase (ADP-forming)'	0.00101563	0	1000	'L-Alanine + ATP + UDP-N-acetylmuramate -> Orthophosphate + UDP-N-acetylmuramoyl-L-alanine + H+ + ADP '	0
'UDP-N-acetylmuramoyl-L-alanine:D-glutamate ligase(ADP-forming)'	0.00101563	0	1000	'UDP-N-acetylmuramoyl-L-alanine + D-Glutamate + ATP -> Orthophosphate + UDP-N-acetylmuramoyl-L-alanyl-D-glutamate + H+ + ADP '	0
'Phosphoenolpyruvate:UDP-N-acetyl-D-glucosamine'	0.00101563	-1000	1000	'UDP-N-acetyl-D-glucosamine + Phosphoenolpyruvate <=> UDP-N-acetyl-3-(1-carboxyvinyl)-D-glucosamine + Orthophosphate + H+ '	0
'UDP-N-acetylmuramate:NADP+ oxidoreductase'	0.00101563	0	1000	'UDP-N-acetyl-3-(1-carboxyvinyl)-D-glucosamine + NADPH + H+ -> NADP+ + UDP-N-acetylmuramate '	0
'6-methyl-3-oxo-octanoyl-ACP:NADP+ oxidoreductase'	0.001091	-1000	1000	'NADPH + H+ + 6-methyl-3-oxo-octanoyl-ACP <=> 6-methyl-3-hydroxy-octanoyl-ACP + NADP+ '	0
'8-methyl-trans-dec-2-enoyl-ACP:NADP+ oxidoreductase (A-specific)'	0.001091	0	1000	'NADPH + H+ + 8-methyl-trans-dec-2-enoyl-ACP -> 8-methyl-decanoyl-ACP + NADP+ '	0
'10-methyl-trans-dodec-2-enoyl-ACP:NADP+ oxidoreductase (A-specific)'	0.001091	0	1000	'10-methyl-trans-dodec-2-enoyl-ACP + NADPH + H+ -> 10-methyl-dodecanoyl-ACP + NADP+ '	0
'4-methyl-hexanoyl-ACP:malonyl-[acyl-carrier-protein] C-acyltransferase (decarboxylating)'	0.001091	0	1000	'4-methyl-hexanoyl-ACP + H+ + Malonyl-[acyl-carrier_protein] -> Acyl-carrier_protein + CO2 + 6-methyl-3-oxo-octanoyl-ACP '	0
'4-methyl-3-oxo-hexanoyl-ACP:malonyl-[acyl-carrier-protein] C-acyltransferase (decarboxylating)'	0.001091	0	1000	'2-methylbutanoyl-ACP + H+ + Malonyl-[acyl-carrier_protein] -> Acyl-carrier_protein + CO2 + 4-methyl-3-oxo-hexanoyl-ACP '	0
'6-methyl-octanoyl-ACP:malonyl-[acyl-carrier-protein] C-acyltransferase (decarboxylating)'	0.001091	0	1000	'H+ + 6-methyl-octanoyl-ACP + Malonyl-[acyl-carrier_protein] -> Acyl-carrier_protein + CO2 + 8-methyl-3-oxo-decanoyl-ACP '	0
'6-methyl-3-hydroxy-octanoyl-ACP hydro-lyase'	0.001091	-1000	1000	'6-methyl-3-hydroxy-octanoyl-ACP <=> 6-methyl-trans-oct-2-enoyl-ACP + H2O '	0
'8-methyl-decanoyl-ACP:malonyl-[acyl-carrier-protein] C-acyltransferase (decarboxylating)'	0.001091	0	1000	'8-methyl-decanoyl-ACP + H+ + Malonyl-[acyl-carrier_protein] -> Acyl-carrier_protein + 10-methyl-3-oxo-dodecanoyl-ACP + CO2 '	0
'2-methylbutanoyl-CoA:[acyl-carrier-protein] transferase'	0.001091	-1000	1000	'2-Methylbutanoyl-CoA + Acyl-carrier_protein <=> 2-methylbutanoyl-ACP + CoA '	0
'rxn07434'	0.001091	0	1000	'(S)-3-Methyl-2-oxopentanoic_acid + H+ + Thiamin_diphosphate -> CO2 + 2-Methyl-1-hydroxybutyl-ThPP '	0
'4-methyl-trans-hex-2-enoyl-ACP:NADP+ oxidoreductase (A-specific)'	0.001091	0	1000	'NADPH + 4-methyl-trans-hex-2-enoyl-ACP + H+ -> 4-methyl-hexanoyl-ACP + NADP+ '	0
'10-methyl-dodecanoyl-ACP:malonyl-[acyl-carrier-protein] C-acyltransferase (decarboxylating)'	0.001091	0	1000	'10-methyl-dodecanoyl-ACP + H+ + Malonyl-[acyl-carrier_protein] -> Acyl-carrier_protein + CO2 + 12-methyl-3-oxo-tetra-decanoyl-ACP '	0
'6-methyl-trans-oct-2-enoyl-ACP:NADP+ oxidoreductase (A-specific)'	0.001091	0	1000	'6-methyl-trans-oct-2-enoyl-ACP + NADPH + H+ -> 6-methyl-octanoyl-ACP + NADP+ '	0
'10-methyl-3-oxo-dodecanoyl-ACP:NADP+ oxidoreductase'	0.001091	-1000	1000	'10-methyl-3-oxo-dodecanoyl-ACP + NADPH + H+ <=> 10-methyl-3-hydroxy-dodecanoyl-ACP + NADP+ '	0
'8-methyl-3-hydroxy-decanoyl-ACP hydro-lyase'	0.001091	-1000	1000	'8-methyl-3-hydroxy-decanoyl-ACP <=> H2O + 8-methyl-trans-dec-2-enoyl-ACP '	0
'4-methyl-3-hydroxy-hexanoyl-ACP hydro-lyase'	0.001091	-1000	1000	'4-methyl-3-hydroxy-hexanoyl-ACP <=> 4-methyl-trans-hex-2-enoyl-ACP + H2O '	0
'12-methyl-trans-tetra-dec-2-enoyl-ACP:NADP+ oxidoreductase (A-specific)'	0.001091	0	1000	'NADPH + H+ + 12-methyl-trans-tetra-dec-2-enoyl-ACP -> 12-methyl-tetra-decanoyl-ACP + NADP+ '	0
'12-methyl-3-oxo-tetra-decanoyl-ACP:NADP+ oxidoreductase'	0.001091	-1000	1000	'NADPH + H+ + 12-methyl-3-oxo-tetra-decanoyl-ACP <=> 12-methyl-3-hydroxy-tetra-decanoyl-ACP + NADP+ '	0
'rxn07435'	0.001091	-1000	1000	'Lipoamide + 2-Methyl-1-hydroxybutyl-ThPP <=> [Dihydrolipoyllysine-residue_(2-methylpropanoyl)transferase] S-(2-methylbutanoyl)dihydrolipoyllysine + Thiamin_diphosphate '	0
'4-methyl-3-oxo-hexanoyl-ACP:NADP+ oxidoreductase'	0.001091	-1000	1000	'NADPH + 4-methyl-3-oxo-hexanoyl-ACP + H+ <=> 4-methyl-3-hydroxy-hexanoyl-ACP + NADP+ '	0
'8-methyl-3-oxo-decanoyl-ACP:NADP+ oxidoreductase'	0.001091	-1000	1000	'NADPH + 8-methyl-3-oxo-decanoyl-ACP + H+ <=> 8-methyl-3-hydroxy-decanoyl-ACP + NADP+ '	0
'10-methyl-3-hydroxy-dodecanoyl-ACP hydro-lyase'	0.001091	-1000	1000	'10-methyl-3-hydroxy-dodecanoyl-ACP <=> 10-methyl-trans-dodec-2-enoyl-ACP + H2O '	0
'12-methyl-3-hydroxy-tetra-decanoyl-ACP hydro-lyase'	0.001091	-1000	1000	'12-methyl-3-hydroxy-tetra-decanoyl-ACP <=> H2O + 12-methyl-trans-tetra-dec-2-enoyl-ACP '	0
'Prephenate:NAD+ oxidoreductase(decarboxylating)'	0.00110805	0	1000	'NAD+ + Prephenate -> 3-(4-Hydroxyphenyl)pyruvate + CO2 + NADH '	0
'ATP:acetate phosphotransferase'	0.00111962	-1000	1000	'ATP + Acetate + H+ <=> Acetyl_phosphate + ADP '	0
'Succinate:(acceptor) oxidoreductase'	0.00113342	-1000	1000	'Succinate + FAD <=> Fumarate + FADH2 '	0
'Succinyl-CoA:L-homoserine O-succinyltransferase'	0.00113342	0	1000	'Succinyl-CoA + L-Homoserine -> O-Succinyl-L-homoserine + CoA '	0
'2-Oxoglutarate:Thiamin diphosphate 2-oxidoreductase(decarboxylating'	0.00113342	0	1000	'2-Oxoglutarate + H+ + Thiamin_diphosphate -> CO2 + 3-Carboxy-1-hydroxypropyl-ThPP '	0
'3-Carboxy-1-hydroxypropyl-ThPP:lipoamde'	0.00113342	-1000	1000	'Lipoamide + 3-Carboxy-1-hydroxypropyl-ThPP <=> S-Succinyldihydrolipoamide + Thiamin_diphosphate '	0
'5-Methyltetrahydrofolate:L-homocysteine S-methyltransferase'	0.00113492	-1000	1000	'5-Methyltetrahydrofolate + L-Homocysteine <=> Tetrahydrofolate + L-Methionine '	0
'Carbamoyl-phosphate:L-aspartate carbamoyltransferase'	0.00122138	0	1000	'L-Aspartate + Carbamoyl_phosphate -> Orthophosphate + N-Carbamoyl-L-aspartate + 2 H+ '	0
'Orotidine-5''-phosphate:pyrophosphate phosphoribosyltransferase'	0.00122138	0	1000	'5-Phospho-alpha-D-ribose_1-diphosphate + Orotate -> Orotidine_5''-phosphate + Pyrophosphate '	0
'Orotidine-5''-phosphate carboxy-lyase'	0.00122138	0	1000	'Orotidine_5''-phosphate + H+ -> UMP + CO2 '	0
'(S)-Dihydroorotate:oxygen oxidoreductase'	0.00122138	0	1000	'Oxygen + (S)-Dihydroorotate -> Orotate + H2O2 '	0
'L-aspartate:L-glutamine amido-ligase (AMP-forming)'	0.00148005	0	1000	'L-Aspartate + ATP + L-Glutamine + H2O -> L-Asparagine + AMP + Pyrophosphate + L-Glutamate '	0
'hydrogen-sulfide:NADP+ oxidoreductase'	0.0017044	0	1000	'3 NADPH + Sulfite + 4 H+ -> Hydrogen_sulfide + 3 H2O + 3 NADP+ '	0
'O3-Acetyl-L-serine acetate-lyase (adding hydrogen sulfide)'	0.0017044	0	1000	'O-Acetyl-L-serine + Hydrogen_sulfide -> Acetate + H+ + L-Cysteine '	0
'APSPTi'	0.0017044	0	1000	'Adenylyl_sulfate + trdrd -> trdox + AMP + Sulfite '	0
'ATP:sulfate adenylyltransferase'	0.0017044	-1000	1000	'Sulfate + ATP + H+ <=> Adenylyl_sulfate + Pyrophosphate '	0
'sulfate transport in via proton symport'	0.0017044	-1000	1000	'Sulfate + H+ <=> Sulfate + H+ '	0
'serine O-acetyltransferase'	0.0017044	0	1000	'Acetyl-CoA + L-Serine -> O-Acetyl-L-serine + CoA '	0
'D-Fructose 6-phosphate:D-glyceraldehyde-3-phosphate glycolaldehyde'	0.00170693	-1000	1000	'D-Fructose_6-phosphate + D-Glyceraldehyde_3-phosphate <=> D-Erythrose_4-phosphate + D-Xylulose_5-phosphate '	0
'Sedoheptulose 1,7-bisphosphate D-glyceraldehyde-3-phosphate-lyase'	0.00170693	-1000	1000	'D-Sedoheptulose_1,7-bisphosphate <=> Glycerone_phosphate + D-Erythrose_4-phosphate '	0
'ATP:Sedoheptulose 7-phosphate 1-phosphotransferase'	0.00170693	-1000	1000	'Sedoheptulose_7-phosphate + ATP <=> D-Sedoheptulose_1,7-bisphosphate + ADP '	0
'Prephenate hydro-lyase (decarboxylating)'	0.00175904	0	1000	'H+ + Prephenate -> CO2 + Phenylpyruvate + H2O '	0
'5-Phosphoribosylamine:pyrophosphate phosphoribosyltransferase'	0.00185728	0	1000	'5-Phospho-alpha-D-ribose_1-diphosphate + L-Glutamine + H2O -> 5-Phosphoribosylamine + Pyrophosphate + L-Glutamate '	0
'5''-Phosphoribosylformylglycinamide:L-glutamine amido-ligase'	0.00185728	0	1000	'5''-Phosphoribosyl-N-formylglycinamide + ATP + L-Glutamine + H2O -> Orthophosphate + 2-(Formamido)-N1-(5''-phosphoribosyl)acetamidine + H+ + ADP + L-Glutamate '	0
'NCAIR synthetase and NCAIR mutase'	0.00185728	0	1000	'ATP + Aminoimidazole_ribotide + HCO3- -> Orthophosphate + 1-(5-Phospho-D-ribosyl)-5-amino-4-imidazolecarboxylate + H+ + ADP '	0
'2-(Formamido)-N1-(5-phosphoribosyl)acetamidine cyclo-ligase'	0.00185728	-1000	1000	'2-(Formamido)-N1-(5''-phosphoribosyl)acetamidine + ATP <=> Orthophosphate + Aminoimidazole_ribotide + H+ + ADP '	0
'10-Formyltetrahydrofolate:5''-phosphoribosylglycinamide'	0.00185728	0	1000	'5''-Phosphoribosylglycinamide + 10-Formyltetrahydrofolate -> Tetrahydrofolate + 5''-Phosphoribosyl-N-formylglycinamide + H+ '	0
'5-Phospho-D-ribosylamine:glycine ligase (ADP-forming)'	0.00185728	0	1000	'ATP + 5-Phosphoribosylamine + Glycine -> Orthophosphate + 5''-Phosphoribosylglycinamide + H+ + ADP '	0
'1-(5''-Phosphoribosyl)-5-amino-4-(N-succinocarboxamide)-imidazole'	0.00185728	-1000	1000	'1-(5-Phosphoribosyl)-4-(N-succinocarboxamide)-5-aminoimidazole <=> 1-(5''-Phosphoribosyl)-5-amino-4-imidazolecarboxamide + Fumarate '	0
'1-(5-Phosphoribosyl)-5-amino-4-carboxyimidazole:L-aspartate ligase'	0.00185728	0	1000	'L-Aspartate + 1-(5-Phospho-D-ribosyl)-5-amino-4-imidazolecarboxylate + ATP -> Orthophosphate + 1-(5-Phosphoribosyl)-4-(N-succinocarboxamide)-5-aminoimidazole + 2 H+ + ADP '	0
'IMP:L-aspartate ligase (GDP-forming)'	0.0018631	0	1000	'L-Aspartate + IMP + GTP -> Orthophosphate + 2 H+ + N6-(1,2-Dicarboxyethyl)-AMP + GDP '	0
'N6-(1,2-Dicarboxyethyl)AMP AMP-lyase'	0.0018631	-1000	1000	'N6-(1,2-Dicarboxyethyl)-AMP <=> Fumarate + AMP '	0
'Carbamoyl-phosphate:L-ornithine carbamoyltransferase'	0.00193025	0	1000	'Carbamoyl_phosphate + L-Ornithine -> Orthophosphate + 2 H+ + L-Citrulline '	0
'Cell wall biosynthesis'	0.002242	-1000	1000	'0.0112 glycerol_teichoic acid (n=45), linked, D-ala substituted + 0.0145 tcam + 0.016 glycerol_teichoic acid (n=45), linked, unsubstituted + 0.00808 glycerol_teichoic acid (n=45), linked, glucose substituted + 0.453 Peptidoglycan_polymer (n subunits) <=> Cell_wall of B. subtilis + 0.48828 Peptidoglycan_polymer (n-1 subunits) '	0
'glycine synthase'	0.00250139	0	1000	'Tetrahydrofolate + NAD+ + Glycine -> CO2 + 5,10-Methylenetetrahydrofolate + NH3 + NADH '	0
'TRDR'	0.002511	-1000	1000	'trdox + NADPH + H+ <=> trdrd + NADP+ '	0
'UTP:alpha-D-glucose-1-phosphate uridylyltransferase'	0.00254936	-1000	1000	'UTP + D-Glucose_1-phosphate <=> Pyrophosphate + UDP-glucose '	0
'10-Formyltetrahydrofolate:5''-phosphoribosyl-5-amino-4-'	0.00267419	-1000	1000	'1-(5''-Phosphoribosyl)-5-amino-4-imidazolecarboxamide + 10-Formyltetrahydrofolate <=> Tetrahydrofolate + 1-(5''-Phosphoribosyl)-5-formamido-4-imidazolecarboxamide '	0
'Dihydrolipoamide:NAD+ oxidoreductase'	0.00268933	-1000	1000	'Dihydrolipoamide + NAD+ <=> Lipoamide + H+ + NADH '	0
'L-Isoleucine:NAD+ oxidoreductase(deaminating)'	0.00269854	0	1000	'(S)-3-Methyl-2-oxopentanoic_acid + NH3 + H+ + NADH -> L-Isoleucine + NAD+ + H2O '	0
'dGTP:uridine 5''-phosphotransferase'	0.00272188	-1000	1000	'Uridine + dGTP <=> UMP + dGDP '	0
'Chorismate pyruvatemutase'	0.0028671	0	1000	'Chorismate -> Prephenate '	0
'Carbon-dioxide:L-glutamine amido-ligase (ADP-forming,'	0.00315162	0	1000	'2 ATP + L-Glutamine + HCO3- + H2O -> Orthophosphate + Carbamoyl_phosphate + H+ + 2 ADP + L-Glutamate '	0
'meso-2,6-Diaminoheptanedioate carboxy-lyase'	0.00325218	0	1000	'H+ + meso-2,6-Diaminoheptanedioate -> CO2 + L-Lysine '	0
'ATP:nucleoside-phosphate phosphotransferase'	0.00329137	-1000	1000	'UMP + ATP <=> UDP + ADP '	0
'L-Glutamine:D-fructose-6-phosphate aminotransferase (hexose'	0.00331119	-1000	1000	'L-Glutamine + D-Fructose_6-phosphate <=> D-Glucosamine_6-phosphate + L-Glutamate '	0
'N-Acyl-D-glucosamine 2-epimerase'	0.00331119	-1000	1000	'N-Acetyl-D-glucosamine <=> N-Acetyl-D-mannosamine '	0
'Phosphoenolpyruvate:3-phosphoshikimate'	0.00341386	-1000	1000	'Shikimate_3-phosphate + Phosphoenolpyruvate <=> Orthophosphate + 5-O-(1-Carboxyvinyl)-3-phosphoshikimate + H+ '	0
'2-Dehydro-3-deoxy-D-arabino-heptonate 7-phosphate phosphate-lyase'	0.00341386	0	1000	'2-Dehydro-3-deoxy-D-arabino-heptonate_7-phosphate -> Orthophosphate + H+ + 3-Dehydroquinate '	0
'Phosphoenolpyruvate:D-erythrose-4-phosphate'	0.00341386	0	1000	'D-Erythrose_4-phosphate + H2O + Phosphoenolpyruvate -> Orthophosphate + H+ + 2-Dehydro-3-deoxy-D-arabino-heptonate_7-phosphate '	0
'3-Dehydroquinate hydro-lyase'	0.00341386	0	1000	'3-Dehydroquinate -> 3-Dehydroshikimate + H2O '	0
'5-O-(1-Carboxyvinyl)-3-phosphoshikimate phosphate-lyase'	0.00341386	0	1000	'5-O-(1-Carboxyvinyl)-3-phosphoshikimate -> Orthophosphate + Chorismate + H+ '	0
'ATP:shikimate 3-phosphotransferase'	0.00341386	-1000	1000	'ATP + Shikimate <=> Shikimate_3-phosphate + ADP '	0
'2-Isopropylmalate hydro-lyase'	0.00346366	-1000	1000	'(2S)-2-Isopropylmalate <=> 2-Isopropylmaleate + H2O '	0
'3-Isopropylmalate:NAD+ oxidoreductase'	0.00346366	-1000	1000	'NAD+ + (2R,3S)-3-Isopropylmalate <=> (2S)-2-Isopropyl-3-oxosuccinate + H+ + NADH '	0
'2-Oxo-4-methyl-3-carboxypentanoate decarboxylation'	0.00346366	0	1000	'(2S)-2-Isopropyl-3-oxosuccinate + H+ -> CO2 + 4-Methyl-2-oxopentanoate '	0
'3-Carboxy-3-hydroxy-4-methylpentanoate 3-methyl-2-oxobutanoate-lyase'	0.00346366	0	1000	'3-Methyl-2-oxobutanoic_acid + Acetyl-CoA + H2O -> H+ + (2S)-2-Isopropylmalate + CoA '	0
'L-Alanine racemase'	0.00362557	-1000	1000	'L-Alanine <=> D-Alanine '	0
'ketol-acid reductoisomerase (2-Acetolactate)'	0.00378954	-1000	1000	'NADPH + 2-Aceto-2-hydroxybutanoate + H+ <=> NADP+ + 2,3-Dihydroxy-3-methylpentanoate '	0
'(R)-2,3-Dihydroxy-3-methylpentanoate hydro-lyase'	0.00378954	0	1000	'2,3-Dihydroxy-3-methylpentanoate -> (S)-3-Methyl-2-oxopentanoic_acid + H2O '	0
'L-threonine ammonia-lyase'	0.00378954	0	1000	'L-Threonine -> 2-Oxobutanoate + NH3 '	0
'(S)-2-Aceto-2-hydroxybutanoate pyruvate-lyase (carboxylating)'	0.00378954	-1000	1000	'2-Oxobutanoate + 2-(alpha-Hydroxyethyl)thiamine_diphosphate <=> 2-Aceto-2-hydroxybutanoate + Thiamin_diphosphate '	0
'dGTP:cytidine 5''-phosphotransferase'	0.00394452	-1000	1000	'Cytidine + dGTP <=> CMP + dGDP '	0
'N6-Acetyl-LL-2,6-diaminoheptanedioate amidohydrolase'	0.00426781	-1000	1000	'N6-Acetyl-LL-2,6-diaminoheptanedioate + H2O <=> Acetate + LL-2,6-Diaminoheptanedioate '	0
'LL-2,6-Diaminoheptanedioate 2-epimerase'	0.00426781	-1000	1000	'LL-2,6-Diaminoheptanedioate <=> meso-2,6-Diaminoheptanedioate '	0
'Acetyl-CoA:L-2,3,4,5-tetrahydrodipicolinate N2-acetyltransferase'	0.00426781	-1000	1000	'Acetyl-CoA + H2O + 2,3,4,5-Tetrahydrodipicolinate <=> N-Acetyl-L-2-amino-6-oxopimelate + CoA '	0
'L-Aspartate-4-semialdehyde hydro-lyase (adding pyruvate and'	0.00426781	0	1000	'L-Aspartate_4-semialdehyde + Pyruvate -> L-2,3-Dihydrodipicolinate + H+ + 2 H2O '	0
'ATP:D-ribose-5-phosphate pyrophosphotransferase'	0.00463535	-1000	1000	'ATP + D-Ribose_5-phosphate <=> 5-Phospho-alpha-D-ribose_1-diphosphate + AMP '	0
'CTP:sn-glycerol-3-phosphate cytidylyltransferase'	0.00468478	-1000	1000	'CTP + sn-Glycerol_3-phosphate <=> Pyrophosphate + CDP-glycerol '	0
'ATP:nucleoside-diphosphate phosphatransferase'	0.00527315	-1000	1000	'CDP + ATP <=> CTP + ADP '	0
'Protein synthesis (B. subtilis)'	0.005284	-1000	1000	'0.2801 L-Asparagine + 0.1028 L-Tryptophan + 0.2801 L-Aspartate + 0.1546 L-Histidine + 0.3041 L-Proline + 0.3526 L-Threonine + 0.5051 L-Alanine + 0.2145 L-Methionine + 0.5107 L-Isoleucine + 0.2097 L-Tyrosine + 0.3329 L-Phenylalanine + 0.4928 L-Glutamine + 0.6114 L-Lysine + 0.6555 L-Leucine + 0.7723 Glycine + 0.4091 L-Serine + 0.4928 L-Glutamate + 0.1073 L-Cysteine + 0.3653 L-Arginine + 0.5807 L-V…	0
'ATP:L-aspartate 4-phosphotransferase'	0.00540123	-1000	1000	'L-Aspartate + ATP + H+ <=> 4-Phospho-L-aspartate + ADP '	0
'L-Aspartate-4-semialdehyde:NADP+ oxidoreductase (phosphorylating)'	0.00540123	0	1000	'4-Phospho-L-aspartate + NADPH -> Orthophosphate + L-Aspartate_4-semialdehyde + NADP+ '	0
'ATP:CMP phosphotransferase'	0.00544986	-1000	1000	'ATP + CMP <=> CDP + ADP '	0
'Succinyl-CoA:glycine C-succinyl-transferase(decarboxylating)'	0.00565268	-1000	1000	'Acetyl-CoA + Glycine <=> CoA + L-2-Amino-3-oxobutanoic_acid '	0
'D-Glucose-6-phosphate:NADP+ 1-oxoreductase'	0.00634079	-1000	1000	'NADP+ + D-Glucose_6-phosphate <=> NADPH + H+ + D-Glucono-1,5-lactone_6-phosphate '	0
'6-Phospho-D-gluconate:NADP+ 2-oxidoreductase (decarboxylating)'	0.00634079	0	1000	'6-Phospho-D-gluconate + NADP+ -> CO2 + D-Ribulose_5-phosphate + NADPH '	0
'6-Phospho-D-glucono-1,5-lactone lactonohydrolase'	0.00634079	-1000	1000	'H2O + D-Glucono-1,5-lactone_6-phosphate <=> 6-Phospho-D-gluconate + H+ '	0
'Potassium uptake'	0.006576	-1000	1000	'Potassium <=> Potassium '	0
'2,3-Dihydroxy-3-methylbutanoate:NADP+ oxidoreductase (isomerizing)'	0.007001	-1000	1000	'2-Acetolactate + NADPH + H+ <=> 2,3-Dihydroxy-3-methylbutanoate + NADP+ '	0
'2,3-Dihydroxy-3-methylbutanoate hydro-lyase'	0.007001	0	1000	'2,3-Dihydroxy-3-methylbutanoate -> 3-Methyl-2-oxobutanoic_acid + H2O '	0
'(S)-Malate hydro-lyase'	0.00835585	-1000	1000	'(S)-Malate <=> Fumarate + H2O '	0
'Pyruvate:carbon-dioxide ligase (ADP-forming)'	0.00864839	-1000	1000	'ATP + HCO3- + Pyruvate <=> Orthophosphate + Oxaloacetate + H+ + ADP '	0
'Acetyl-CoA:carbon-dioxide ligase (ADP-forming)'	0.00969359	-1000	1000	'Acetyl-CoA + Carboxybiotin-carboxyl-carrier_protein <=> Holo-[carboxylase] + Malonyl-CoA '	0
'biotin-carboxyl-carrier-protein:carbon-dioxide ligase (ADP-forming)'	0.00969359	-1000	1000	'Holo-[carboxylase] + ATP + HCO3- <=> Orthophosphate + H+ + Carboxybiotin-carboxyl-carrier_protein + ADP '	0
'malonyl-ACP:[acyl-carrier-protein] transferase'	0.00969359	-1000	1000	'Acyl-carrier_protein + Malonyl-CoA <=> Malonyl-[acyl-carrier_protein] + CoA '	0
'calcium transport in/out via proton antiporter'	0.00985622	-1000	1000	'Calcium + H+ <=> Calcium + H+ '	0
'citrate-Ca2+:H+ symporter'	0.00988605	-1000	1000	'Citrate + Calcium + H+ <=> Citrate + Calcium + H+ '	0
'Biomass'	0.01	0.01	0.01	'0.0002924 CDP + 0.00014977 mql7 + 0.0006105 CTP + 0.076 Lipid_composition of B. subtilis + 0.00027311 Acyl-carrier_protein + 105.0034 ATP + 0.09474 Magnesium + 0.2242 Cell_wall of B. subtilis + 0.005253 AMP + 0.0304 Lipoteichoic_acid content + 0.003209 Fe3+ + 0.026 DNA + 0.002983 Calcium + 0.001153 CMP + 0.01822 NAD+ + 0.0005939 GMP + 0.0002367 NADPH + 0.0655 mRNA + 0.6576 Potassium + 105 H2O + …	0
'EX cpd11416 c'	0.01	-1000	1000	'Biomass <=> '	0
'Formate:NAD+ oxidoreductase'	0.0106942	0	1000	'NAD+ + Formate -> CO2 + NADH '	0
'pyruvate:thiamin diphosphate acetaldehydetransferase'	0.0107905	0	1000	'H+ + Pyruvate + Thiamin_diphosphate -> CO2 + 2-(alpha-Hydroxyethyl)thiamine_diphosphate '	0
'Isocitrate:NADP+ oxidoreductase (decarboxylating)'	0.0108976	-1000	1000	'Isocitrate + NADP+ <=> Oxalosuccinate + NADPH + H+ '	0
'citrate hydro-lyase'	0.0108976	-1000	1000	'Citrate <=> Isocitrate '	0
'Oxalosuccinate:NADP+ oxidoreductase (decarboxylating)'	0.0108976	0	1000	'Oxalosuccinate + H+ -> 2-Oxoglutarate + CO2 '	0
'hydrogen-peroxide:hydrogen-peroxide oxidoreductase'	0.0141165	0	1000	'2 H2O2 -> Oxygen + 2 H2O '	0
'L-Glutamate:NADP+ oxidoreductase (transaminating)'	0.0150804	-1000	1000	'NADP+ + 2 L-Glutamate <=> 2-Oxoglutarate + NADPH + L-Glutamine + H+ '	0
'nitrate transport in via proton symport'	0.0151399	-1000	1000	'Nitrate + H+ <=> Nitrate + H+ '	0
'5,10-methylenetetrahydrofolate:NADP+ oxidoreductase'	0.0152257	-1000	1000	'5,10-Methylenetetrahydrofolate + NADP+ <=> NADPH + 5,10-Methenyltetrahydrofolate '	0
'5,10-Methenyltetrahydrofolate 5-hydrolase(decyclizing)'	0.0152257	-1000	1000	'H2O + 5,10-Methenyltetrahydrofolate <=> H+ + 10-Formyltetrahydrofolate '	0
'D-Glycerate:NADP+ 2-oxidoreductase'	0.0179245	-1000	1000	'NAD+ + D-Glycerate <=> H+ + NADH + Hydroxypyruvate '	0
'Pyruvate:oxygen 2-oxidoreductase (phosphorylating)'	0.0268165	0	1000	'Orthophosphate + Oxygen + 2 H+ + Pyruvate -> CO2 + Acetyl_phosphate + H2O2 '	0
'D-Fructose-1,6-bisphosphate D-glyceraldehyde-3-phosphate-lyase'	0.0469883	-1000	1000	'D-Fructose_1,6-bisphosphate <=> Glycerone_phosphate + D-Glyceraldehyde_3-phosphate '	1
'ATP:D-fructose-6-phosphate 1-phosphotransferase'	0.0469883	-1000	1000	'ATP + D-Fructose_6-phosphate <=> D-Fructose_1,6-bisphosphate + ADP '	1
'NADH dehydrogenase (Menaquinone 7 cpd00418 proton)'	0.0474665	0	1000	'Menaquinone_7 + H+ + NADH -> mql7 + NAD+ '	0
'cytochrome-c reductase (menaquinol 7: 3 protons)'	0.0474665	-1000	1000	'mql7 + H+ + 2 Ferricytochrome_c <=> 2 Ferrocytochrome_c + Menaquinone_7 + 3 H+ '	0
'cytochrome-c oxidase (H+/e- = 2)'	0.0474665	-1000	1000	'2 Ferrocytochrome_c + 0.5 Oxygen + 6 H+ <=> 4 H+ + H2O + 2 Ferricytochrome_c '	0
'beta-D-Glucose 1-phosphate 1,6-phosphomutase'	0.0520065	-1000	1000	'beta-D-Glucose_1-phosphate <=> beta-D-Glucose_6-phosphate '	0
'Maltose:orthophosphate 1-beta-D-glucosyltransferase'	0.0520065	-1000	1000	'Orthophosphate + H+ + Maltose <=> D-Glucose + beta-D-Glucose_1-phosphate '	0
'beta-D-Glucose 6-phosphate ketol-isomerase'	0.0520065	-1000	1000	'beta-D-Glucose_6-phosphate <=> D-Fructose_6-phosphate '	0
'D-glucose transport in via proton symport'	0.0520065	-1000	1000	'D-Glucose + H+ <=> D-Glucose + H+ '	0
'EX cpd00079 e'	0.0554079	0	1000	'D-Glucose_6-phosphate <=> '	0
'Glucose-phosphotransferase (PTS) system'	0.0642981	-1000	1000	'D-Glucose + Phosphoenolpyruvate <=> Pyruvate + D-Glucose_6-phosphate '	0
'Ammonia transport via diffusion'	0.0653191	-1000	1000	'NH3 <=> NH3 '	0
'EX cpd00011 e'	0.0697763	-1000	1000	'CO2 <=> '	0
'2-Phospho-D-glycerate hydro-lyase'	0.0721414	-1000	1000	'2-Phospho-D-glycerate <=> H2O + Phosphoenolpyruvate '	1
'D-Glyceraldehyde-3-phosphate:NAD+ oxidoreductase(phosphorylating)'	0.0900614	-1000	1000	'Orthophosphate + NAD+ + D-Glyceraldehyde_3-phosphate <=> 3-Phospho-D-glyceroyl_phosphate + NADH '	1
'Tripolyphosphate transport in via proton symport'	0.124572	-1000	1000	'Triphosphate + H+ <=> Triphosphate + H+ '	0
'ATP synthase (four protons for one ATP)'	0.242126	-1000	1000	'Orthophosphate + 4 H+ + ADP <=> ATP + 3 H+ + H2O '	0
'EX cpd00009 e'	0.308242	-1000	1000	'Orthophosphate <=> '	0
'Fluxmeasure'	4.96345	0	1000	'X -> '	0
'Biomass'	1
'EX cpd00079 e'	5.54079	'D-Glucose_6-phosphate <=> '
'EX cpd00009 e'	30.8242	'Orthophosphate <=> '
'EX cpd00137 e'	-1.08976	'Citrate <=> '
'EX cpd00067 e'	-84.939	'H+ <=> '
'EX cpd00421 e'	-12.4572	'Triphosphate <=> '
'EX cpd11416 c'	1	'Biomass <=> '
'EX cpd10516 e'	-0.003209	'Fe3+ <=> '
'EX cpd00209 e'	-1.51399	'Nitrate <=> '
'EX cpd00063 e'	-0.002983	'Calcium <=> '
'EX cpd00027 e'	-11.6305	'D-Glucose <=> '
'EX cpd00048 e'	-0.17044	'Sulfate <=> '
'EX cpd00029 e'	0.0958635	'Acetate <=> '
'EX cpd00040 e'	0.000206831	'Glyoxylate <=> '
'EX cpd00013 e'	-6.53191	'NH3 <=> '
'EX cpd00254 e'	-0.09474	'Magnesium <=> '
'EX cpd00011 e'	6.97763	'CO2 <=> '
'EX cpd00205 e'	-0.6576	'Potassium <=> '
'Fluxmeasure'	496.345
