# Supplementary material for: Dynamic metabolic models in context: biomass backtracking
Source: Royal Society of Chemistry journal article supplement (doi:10.1039/c5ib00050e), 2015-07-08
Supplement: c5ib00050e1.zip [file SupplementaryTable2_BiomodelsSummary.xls]

## Sheet: allMetModels
BioModels ID	Name	Publication ID	Last Modified	Curated?	Categrorization	Has Biomass?	How is boundary problem solved?	Species
MODEL1212040000	Karlstaedt2012 - CardioNet, A Human Metabolic Network	22929619	2012-12-05	nc	-4	genome scale reconstruction	no biomass, only precursors	Human cardiomyocytes
MODEL1401290000	Thomas2014 - The effect of aspirin resistance on platelet metabolism (constraint-based modelling)	24473230	2014-01-31	nc	-4	genome scale reconstruction	platelets, no division/growth, maintenencae?	Human platelets
MODEL1106200000	Chang2011_MetabolicNetworkReconstruction_ChlamydomonasReinhardtii	21811229	2011-08-12	nc	-3	genome scale reconstruction	new biomass, estimated based on literature data	ChlamydomonasReinhardtii
MODEL1111240001	Huthmacher2010_HumanErythrocyte_MetabolicNetwork	20807400	2011-11-24	nc	-3	genome scale reconstruction	own biomass	human erythrocytes
MODEL1109130000	Thiele2013 - Human metabolism global reconstruction (Recon 2)	23455439	2013-08-29	nc	-3	genome scale reconstruction	new biomass (leukemia cells), based on literature	Human leukemia
MODEL1011090000	Goffin2010_L_plantarum_Metabolism	20865006	2010-11-09	nc	-3	genome scale reconstruction		L. plantarum
MODEL1111240000	Huthmacher2010_MetabolicNetwork_P.falciparum	20807400	2011-11-24	nc	-3	genome scale reconstruction	stage specific biomass	P.falciparum
MODEL1011300000	Kim2010_VvuMBEL943_GSMR	21245845	2011-06-23	nc	-3	genome scale reconstruction	new biomass, measured	Vibrio vulnificus
MODEL1002240000	Nookaew2008_Yeast_MetabolicNetwork_iIN800	18687109	2012-02-03	nc	-3	genome scale reconstruction	own biomass	Yeast
MODEL1111070003	Bordbar2011_MultiTissueType_MetabolicNetwork	22041191	2011-11-07	nc	-3	genome scale/ whole body	tissue specific biomass	Human	CHECK
MODEL1111070000	Bordbar2011_TissueSpecific-Adipocyte_MetabolicNetwork	22041191	2011-11-07	nc	-3	genome scale/ whole body	tissue specific biomass	Human Adipocytes	CHECK
MODEL1111070001	Bordbar2011_TissueSpecific-Hepatocyte_MetabolicNetwork	22041191	2011-11-07	nc	-3	genome scale/ whole body	tissue specific biomass	human hepatocytes	CHECK
MODEL1111070002	Bordbar2011_TissueSpecific-Myocyte_MetablicNetwork	22041191	2011-11-07	nc	-3	genome scale/ whole body	tissue specific biomass	Human Myocyte	CHECK
MODEL1012300000	MacDonald2011_GeneticMetabolicDeterminants_BuchnereAphidicola	21392141	2011-08-15	nc	-2	genome scale reconstruction	biomass adjusted from previous model iGHT196	Buchnere Aphidicola	CHECK
MODEL1402200000	Mardinoglu2013 - Genome-scale metabolic model (HMR version 1.0) - generic human cell	23511207	2014-02-21	nc	-2	genome scale reconstruction	detailed fat composition.	Human
MODEL1402200002	Mardinoglu2014 - Genome-scale metabolic model (HMR version 2.0) - generic human cell	24419221	2014-02-21	nc	-2	genome scale reconstruction	detailed fat composition.	Human
MODEL1402200001	Mardinoglu2013 - Genome-scale metabolic model (HMR version 1.0) - human adipocytes (iAdipocytes1809)	23511207	2014-02-21	nc	-2	genome scale reconstruction	detailed fat composition.	Human adipocytes
MODEL1402200003	Mardinoglu2014 - Genome-scale metabolic model (HMR verson 2.0) - human hepatocytes (iHepatocytes2322)	24419221	2014-02-21	nc	-2	genome scale reconstruction	detailed fat composition.	Human adipocytes
MODEL1310300000	Flahaut2013 - Genome-scale metabolic model of L.lactis (MG1363)	23974365	2013-11-03	nc	-2	genome scale reconstruction	old biomass from Verouden 2009, partially new data	L. lactis
MODEL1007060000	Plata2010_P_falciparum_iTH366	20823846	2010-09-16	nc	-2	genome scale reconstruction		P.falciparum			Unclassified				Dynamic models				Genome scale models
MODEL1201230000	Jol2012_YeastMetabolism_EFManalysis	22416224	2012-03-26	nc	-2	genome/large scale model	biomass modified from iND750	Yeast			4	could not be classified	6		0	no biomass	52		-1	biomass composition from other species/celltype/version	132
MODEL1304120000	Goyal2014 - Genome-scale metabolic model of M.maripaludis S2	24553424	2014-09-24	nc	-2	GSM with own biomass	new biomss, estimated (Lee	M.maripaludis			5	non-metabolic	9		1	no biomass, but excretion	108		-2	biomass composition from other species adapted with new data	9
MODEL1302010038	Pitkanen2014 - Metabolic reconstruction of Ashbya gossypii using CoReCo	24516375	2014-03-02	nc	-1	genome scale reconstruction	Yeast biomass	Ashbya gossypii							2	drain of some intermediates with fixed/arbitrary stoichiometry	8		-3	data based own biomass composition	11
MODEL1302010012	Pitkanen2014 - Metabolic reconstruction of Aspergillus clavatus using CoReCo	24516375	2014-03-02	nc	-1	genome scale reconstruction	Yeast biomass	Aspergillus clavatus							3	drain of some intermediates with fixed context dependant stoichiometry	1		-4	other	2
MODEL1302010024	Pitkanen2014 - Metabolic reconstruction of Aspergillus fumigatus using CoReCo	24516375	2014-03-02	nc	-1	genome scale reconstruction	Yeast biomass	Aspergillus fumigatus									0				0
MODEL1302010005	Pitkanen2014 - Metabolic reconstruction of Aspergillus nidulans using CoReCo	24516375	2014-03-02	nc	-1	genome scale reconstruction	Yeast biomass	Aspergillus nidulans
MODEL1302010017	Pitkanen2014 - Metabolic reconstruction of Aspergillus niger using CoReCo	24516375	2014-03-02	nc	-1	genome scale reconstruction	Yeast biomass	Aspergillus niger
MODEL1302010008	Pitkanen2014 - Metabolic reconstruction of Aspergillus oryzae using CoReCo	24516375	2014-03-02	nc	-1	genome scale reconstruction	Yeast biomass	Aspergillus oryzae
MODEL1302010015	Pitkanen2014 - Metabolic reconstruction of Aspergillus terreus using CoReCo	24516375	2014-03-02	nc	-1	genome scale reconstruction	Yeast biomass	Aspergillus terreus
MODEL1302010042	Pitkanen2014 - Metabolic reconstruction of Batrachochytrium dendrobatidis using CoReCo	24516375	2014-03-02	nc	-1	genome scale reconstruction	Yeast biomass	Batrachochytrium dendrobatidis
MODEL1311070000	Ponce-de-Léon2013 - Genome scale metabolic model for Blattabacterium cuenoti (iMP240)	24176055	2014-01-15	nc	-1	genome scale reconstruction	based on iCG238, which is based on E-coli biomass	Blattabacterium cuenoti
MODEL1302010027	Pitkanen2014 - Metabolic reconstruction of Botrytis cinerea using CoReCo	24516375	2014-03-02	nc	-1	genome scale reconstruction	Yeast biomass	Botrytis cinerea
MODEL1302010046	Pitkanen2014 - Metabolic reconstruction of Candida albicans using CoReCo	24516375	2014-03-02	nc	-1	genome scale reconstruction	Yeast biomass	Candida albicans
MODEL1302010028	Pitkanen2014 - Metabolic reconstruction of Candida glabrata using CoReCo	24516375	2014-03-02	nc	-1	genome scale reconstruction	Yeast biomass	Candida glabrata
MODEL1302010037	Pitkanen2014 - Metabolic reconstruction of Candida lusitaniae using CoReCo	24516375	2014-03-02	nc	-1	genome scale reconstruction	Yeast biomass	Candida lusitaniae
MODEL1302010003	Pitkanen2014 - Metabolic reconstruction of Candida tropicalis using CoReCo	24516375	2014-03-02	nc	-1	genome scale reconstruction	Yeast biomass	Candida tropicalis
MODEL1302010002	Pitkanen2014 - Metabolic reconstruction of Chaetomium globosum using CoReCo	24516375	2014-03-02	nc	-1	genome scale reconstruction	Yeast biomass	Chaetomium globosum
MODEL1302010007	Pitkanen2014 - Metabolic reconstruction of Coccidioides immitis using CoReCo	24516375	2014-03-02	nc	-1	genome scale reconstruction	Yeast biomass	Coccidioides immitis
MODEL1302010006	Pitkanen2014 - Metabolic reconstruction of Coprinus cinereus using CoReCo	24516375	2014-03-02	nc	-1	genome scale reconstruction	Yeast biomass	Coprinus cinereus
MODEL1302010039	Pitkanen2014 - Metabolic reconstruction of Cryptococcus neoformans using CoReCo	24516375	2014-03-02	nc	-1	genome scale reconstruction	Yeast biomass	Cryptococcus neoformans
MODEL1302010023	Pitkanen2014 - Metabolic reconstruction of Debaryomyces hansenii using CoReCo	24516375	2014-03-02	nc	-1	genome scale reconstruction	Yeast biomass	Debaryomyces hansenii
MODEL1105030000	Zhuang2011 - Ecoli FBA with membrane economics	21694717	2013-06-17	nc	-1	genome scale reconstruction		E.coli
MODEL1302010030	Pitkanen2014 - Metabolic reconstruction of Encephalitozoon cuniculi using CoReCo	24516375	2014-03-02	nc	-1	genome scale reconstruction	Yeast biomass	Encephalitozoon cuniculi
MODEL1302010026	Pitkanen2014 - Metabolic reconstruction of Fusarium graminearum using CoReCo	24516375	2014-03-02	nc	-1	genome scale reconstruction	Yeast biomass	Fusarium graminearum								All models	marked as metabolic in Biomodels
MODEL1302010014	Pitkanen2014 - Metabolic reconstruction of Fusarium oxysporum using CoReCo	24516375	2014-03-02	nc	-1	genome scale reconstruction	Yeast biomass	Fusarium oxysporum								Dynm	GSM	nonMetabolic	unclassified
MODEL1302010001	Pitkanen2014 - Metabolic reconstruction of Fusarium verticillioides using CoReCo	24516375	2014-03-02	nc	-1	genome scale reconstruction	Yeast biomass	Fusarium verticillioides								169	154	9	6
MODEL1302010022	Pitkanen2014 - Metabolic reconstruction of Histoplasma capsulatum using CoReCo	24516375	2014-03-02	nc	-1	genome scale reconstruction	Yeast biomass	Histoplasma capsulatum
MODEL1105100000	Shlomi2011 - Warburg effect, metabolic model	21423717	2013-05-28	nc	-1	genome scale reconstruction		Human
MODEL1310110000	Thiele2013 - Cerebellum cells in granular layer	23455439	2013-10-14	nc	-1	genome scale reconstruction	new biomass (leukemia cells), based on literature	Human
MODEL1310110001	Thiele2013 - Adrenal gland glandular cells	23455439	2013-10-14	nc	-1	genome scale reconstruction	new biomass (leukemia cells), based on literature	Human
MODEL1310110002	Thiele2013 - Spleen cells in white pulp	23455439	2013-10-14	nc	-1	genome scale reconstruction	new biomass (leukemia cells), based on literature	Human
MODEL1310110003	Thiele2013 - Skin epidermal cells	23455439	2013-10-14	nc	-1	genome scale reconstruction	new biomass (leukemia cells), based on literature	Human
MODEL1310110004	Thiele2013 - Uterus post menopause glandular cells	23455439	2013-10-14	nc	-1	genome scale reconstruction	new biomass (leukemia cells), based on literature	Human
MODEL1310110005	Thiele2013 - Hippocampus glial cells	23455439	2013-10-14	nc	-1	genome scale reconstruction	new biomass (leukemia cells), based on literature	Human
MODEL1310110006	Thiele2013 - Uterus pre menopause glandular cells	23455439	2013-10-14	nc	-1	genome scale reconstruction	new biomass (leukemia cells), based on literature	Human
MODEL1310110007	Thiele2013 - Lymph node non germinal center cells	23455439	2013-10-14	nc	-1	genome scale reconstruction	new biomass (leukemia cells), based on literature	Human
MODEL1310110008	Thiele2013 - Testis Leydig cells	23455439	2013-10-14	nc	-1	genome scale reconstruction	new biomass (leukemia cells), based on literature	Human
MODEL1310110009	Thiele2013 - Fallopian tube glandular cells	23455439	2013-10-14	nc	-1	genome scale reconstruction	new biomass (leukemia cells), based on literature	Human
MODEL1310110010	Thiele2013 - Lung pneumocytes	23455439	2013-10-14	nc	-1	genome scale reconstruction	new biomass (leukemia cells), based on literature	Human
MODEL1310110011	Thiele2013 - Skeletal muscle myocytes	23455439	2013-10-14	nc	-1	genome scale reconstruction	new biomass (leukemia cells), based on literature	Human
MODEL1310110012	Thiele2013 - Duodenum glandular cells	23455439	2013-10-14	nc	-1	genome scale reconstruction	new biomass (leukemia cells), based on literature	Human
MODEL1310110013	Thiele2013 - Pancreas islets of Langerhans	23455439	2013-10-14	nc	-1	genome scale reconstruction	new biomass (leukemia cells), based on literature	Human
MODEL1310110014	Thiele2013 - Liver hepatocytes	23455439	2013-10-14	nc	-1	genome scale reconstruction	new biomass (leukemia cells), based on literature	Human
MODEL1310110015	Thiele2013 - Thyroid gland glandular cells	23455439	2013-10-14	nc	-1	genome scale reconstruction	new biomass (leukemia cells), based on literature	Human
MODEL1310110016	Thiele2013 - Cerebellum cells in molecular layer	23455439	2013-10-14	nc	-1	genome scale reconstruction	new biomass (leukemia cells), based on literature	Human
MODEL1310110017	Thiele2013 - Uterus post menopause cells in endometrial stroma	23455439	2013-10-14	nc	-1	genome scale reconstruction	new biomass (leukemia cells), based on literature	Human
MODEL1310110018	Thiele2013 - Prostate glandular cells	23455439	2013-10-14	nc	-1	genome scale reconstruction	new biomass (leukemia cells), based on literature	Human
MODEL1310110019	Thiele2013 - Vagina squamous epithelial cells	23455439	2013-10-14	nc	-1	genome scale reconstruction	new biomass (leukemia cells), based on literature	Human
MODEL1310110020	Thiele2013 - Small intestine glandular cells	23455439	2013-10-14	nc	-1	genome scale reconstruction	new biomass (leukemia cells), based on literature	Human
MODEL1310110021	Thiele2013 - Tonsil germinal center cells	23455439	2013-10-14	nc	-1	genome scale reconstruction	new biomass (leukemia cells), based on literature	Human
MODEL1310110022	Thiele2013 - Uterus pre menopause cells in endometrial stroma	23455439	2013-10-14	nc	-1	genome scale reconstruction	new biomass (leukemia cells), based on literature	Human
MODEL1310110023	Thiele2013 - Breast glandular cells	23455439	2013-10-14	nc	-1	genome scale reconstruction	new biomass (leukemia cells), based on literature	Human
MODEL1310110024	Thiele2013 - Pancreas exocrine glandular cells	23455439	2013-10-14	nc	-1	genome scale reconstruction	new biomass (leukemia cells), based on literature	Human
MODEL1310110025	Thiele2013 - Smooth muscle smooth muscle cells	23455439	2013-10-14	nc	-1	genome scale reconstruction	new biomass (leukemia cells), based on literature	Human
MODEL1310110026	Thiele2013 - Cervix uterine glandular cells	23455439	2013-10-14	nc	-1	genome scale reconstruction	new biomass (leukemia cells), based on literature	Human
MODEL1310110027	Thiele2013 - Oral mucosa squamous epithelial cells	23455439	2013-10-14	nc	-1	genome scale reconstruction	new biomass (leukemia cells), based on literature	Human
MODEL1310110028	Thiele2013 - Parathyroid gland glandular cells	23455439	2013-10-14	nc	-1	genome scale reconstruction	new biomass (leukemia cells), based on literature	Human
MODEL1310110029	Thiele2013 - Ovary ovarian stroma cells	23455439	2013-10-14	nc	-1	genome scale reconstruction	new biomass (leukemia cells), based on literature	Human
MODEL1310110030	Thiele2013 - Bone marrow hematopoietic cells	23455439	2013-10-14	nc	-1	genome scale reconstruction	new biomass (leukemia cells), based on literature	Human
MODEL1310110031	Thiele2013 - Seminal vesicle glandular cells	23455439	2013-10-14	nc	-1	genome scale reconstruction	new biomass (leukemia cells), based on literature	Human
MODEL1310110032	Thiele2013 - Appendix lymphoid tissue	23455439	2013-10-14	nc	-1	genome scale reconstruction	new biomass (leukemia cells), based on literature	Human
MODEL1310110033	Thiele2013 - Cerebral cortex neuronal cells	23455439	2013-10-14	nc	-1	genome scale reconstruction	new biomass (leukemia cells), based on literature	Human
MODEL1310110034	Thiele2013 - Hippocampus neuronal cells	23455439	2013-10-14	nc	-1	genome scale reconstruction	new biomass (leukemia cells), based on literature	Human
MODEL1310110035	Thiele2013 - Urinary bladder urothelial cells	23455439	2013-10-14	nc	-1	genome scale reconstruction	new biomass (leukemia cells), based on literature	Human
MODEL1310110036	Thiele2013 - Lymph node germinal center cells	23455439	2013-10-14	nc	-1	genome scale reconstruction	new biomass (leukemia cells), based on literature	Human
MODEL1310110037	Thiele2013 - Lateral ventricle glial cells	23455439	2013-10-14	nc	-1	genome scale reconstruction	new biomass (leukemia cells), based on literature	Human
MODEL1310110038	Thiele2013 - Appendix glandular cells	23455439	2013-10-14	nc	-1	genome scale reconstruction	new biomass (leukemia cells), based on literature	Human
MODEL1310110039	Thiele2013 - Testis cells in seminiferus ducts	23455439	2013-10-14	nc	-1	genome scale reconstruction	new biomass (leukemia cells), based on literature	Human
MODEL1310110040	Thiele2013 - Lateral ventricle neuronal cells	23455439	2013-10-14	nc	-1	genome scale reconstruction	new biomass (leukemia cells), based on literature	Human
MODEL1310110041	Thiele2013 - Liver bile duct cells	23455439	2013-10-14	nc	-1	genome scale reconstruction	new biomass (leukemia cells), based on literature	Human
MODEL1310110042	Thiele2013 - Gall bladder glandular cells	23455439	2013-10-14	nc	-1	genome scale reconstruction	new biomass (leukemia cells), based on literature	Human
MODEL1310110043	Thiele2013 - Colon glandular cells	23455439	2013-10-14	nc	-1	genome scale reconstruction	new biomass (leukemia cells), based on literature	Human
MODEL1310110044	Thiele2013 - Cervix uterine squamous epithelial cells	23455439	2013-10-14	nc	-1	genome scale reconstruction	new biomass (leukemia cells), based on literature	Human
MODEL1310110045	Thiele2013 - Tonsil non germinal center cells	23455439	2013-10-14	nc	-1	genome scale reconstruction	new biomass (leukemia cells), based on literature	Human
MODEL1310110046	Thiele2013 - Stomach lower glandular cells	23455439	2013-10-14	nc	-1	genome scale reconstruction	new biomass (leukemia cells), based on literature	Human
MODEL1310110047	Thiele2013 - Kidney cells in tubules	23455439	2013-10-14	nc	-1	genome scale reconstruction	new biomass (leukemia cells), based on literature	Human
MODEL1310110048	Thiele2013 - Esophagus squamous epithelial cells	23455439	2013-10-14	nc	-1	genome scale reconstruction	new biomass (leukemia cells), based on literature	Human
MODEL1310110049	Thiele2013 - Placenta decidual cells	23455439	2013-10-14	nc	-1	genome scale reconstruction	new biomass (leukemia cells), based on literature	Human
MODEL1310110050	Thiele2013 - Cerebellum Purkinje cells	23455439	2013-10-14	nc	-1	genome scale reconstruction	new biomass (leukemia cells), based on literature	Human
MODEL1310110051	Thiele2013 - Lung macrophages	23455439	2013-10-14	nc	-1	genome scale reconstruction	new biomass (leukemia cells), based on literature	Human
MODEL1310110052	Thiele2013 - Nasopharynx respiratory epithelial cells	23455439	2013-10-14	nc	-1	genome scale reconstruction	new biomass (leukemia cells), based on literature	Human
MODEL1310110053	Thiele2013 - Kidney cells in glomeruli	23455439	2013-10-14	nc	-1	genome scale reconstruction	new biomass (leukemia cells), based on literature	Human
MODEL1310110054	Thiele2013 - Epididymis glandular cells	23455439	2013-10-14	nc	-1	genome scale reconstruction	new biomass (leukemia cells), based on literature	Human
MODEL1310110055	Thiele2013 - Placenta trophoblastic cells	23455439	2013-10-14	nc	-1	genome scale reconstruction	new biomass (leukemia cells), based on literature	Human
MODEL1310110056	Thiele2013 - Heart muscle myocytes	23455439	2013-10-14	nc	-1	genome scale reconstruction	new biomass (leukemia cells), based on literature	Human
MODEL1310110057	Thiele2013 - Rectum glandular cells	23455439	2013-10-14	nc	-1	genome scale reconstruction	new biomass (leukemia cells), based on literature	Human
MODEL1310110058	Thiele2013 - Tonsil squamous epithelial cells	23455439	2013-10-14	nc	-1	genome scale reconstruction	new biomass (leukemia cells), based on literature	Human
MODEL1310110059	Thiele2013 - Stomach upper glandular cells	23455439	2013-10-14	nc	-1	genome scale reconstruction	new biomass (leukemia cells), based on literature	Human
MODEL1310110060	Thiele2013 - Spleen cells in red pulp	23455439	2013-10-14	nc	-1	genome scale reconstruction	new biomass (leukemia cells), based on literature	Human
MODEL1310110061	Thiele2013 - Vulva anal skin epidermal cells	23455439	2013-10-14	nc	-1	genome scale reconstruction	new biomass (leukemia cells), based on literature	Human
MODEL1310110062	Thiele2013 - Salivary gland glandular cells	23455439	2013-10-14	nc	-1	genome scale reconstruction	new biomass (leukemia cells), based on literature	Human
MODEL1310110063	Thiele2013 - Bronchus respiratory epithelial cells	23455439	2013-10-14	nc	-1	genome scale reconstruction	new biomass (leukemia cells), based on literature	Human
MODEL1310110064	Thiele2013 - Cerebral cortex glial cells	23455439	2013-10-14	nc	-1	genome scale reconstruction	new biomass (leukemia cells), based on literature	Human
MODEL1311110000	Smallbone2013 - Human metabolism global reconstruction (recon 2.1)	http://arxiv.org/abs/1311.5696	2013-11-26	nc	-1	genome scale reconstruction	same biomass as recon2	Human
MODEL1311110001	Smallbone2013 - Human metabolism global reconstruction (recon 2.1x)	http://arxiv.org/abs/1311.5696	2013-11-26	nc	-1	genome scale reconstruction	same biomass as recon2	Human
MODEL1009150002	Jerby2010_Liver_Metabolism	20823844	2010-09-16	nc	-1	genome scale reconstruction		Human hepatocytes
MODEL1302010011	Pitkanen2014 - Metabolic reconstruction of Kluyveromyces lactis using CoReCo	24516375	2014-03-02	nc	-1	genome scale reconstruction	Yeast biomass	Kluyveromyces lactis
MODEL1302010041	Pitkanen2014 - Metabolic reconstruction of Laccaria bicolor using CoReCo	24516375	2014-03-02	nc	-1	genome scale reconstruction	Yeast biomass	Laccaria bicolor
MODEL1302010033	Pitkanen2014 - Metabolic reconstruction of Lodderomyces elongisporus using CoReCo	24516375	2014-03-02	nc	-1	genome scale reconstruction	Yeast biomass	Lodderomyces elongisporus
MODEL1302010009	Pitkanen2014 - Metabolic reconstruction of Magnaporthe grisea using CoReCo	24516375	2014-03-02	nc	-1	genome scale reconstruction	Yeast biomass	Magnaporthe grisea
MODEL5662377562	Feist2006_methanogenesis_OptiAcetate	16738551	2007-07-04	nc	-1	genome scale reconstruction	' typical prokaryotic cell', Neidhardt et al, 1990	Methanosarcina barkeri
MODEL5662398146	Feist2006_methanogenesis_OptiH2-CO2	16738551	2007-07-04	nc	-1	genome scale reconstruction	' typical prokaryotic cell', Neidhardt et al, 1991	Methanosarcina barkeri
MODEL5662425708	Feist2006_methanogenesis_OptiPyruvate	16738551	2007-07-04	nc	-1	genome scale reconstruction	' typical prokaryotic cell', Neidhardt et al, 1992	Methanosarcina barkeri
MODEL5662324959	Feist2006_methanogenesis_OptiMethanol	16738551	2007-07-04	nc	-1	genome scale reconstruction	' typical prokaryotic cell', Neidhardt et al, 1993	Methanosarcina barkeri
MODEL1302010031	Pitkanen2014 - Metabolic reconstruction of Mycosphaerella graminicola using CoReCo	24516375	2014-03-02	nc	-1	genome scale reconstruction	Yeast biomass	Mycosphaerella graminicola
MODEL1302010020	Pitkanen2014 - Metabolic reconstruction of Nectria haematococca using CoReCo	24516375	2014-03-02	nc	-1	genome scale reconstruction	Yeast biomass	Nectria haematococca
MODEL1302010047	Pitkanen2014 - Metabolic reconstruction of Neosartorya fischeri using CoReCo	24516375	2014-03-02	nc	-1	genome scale reconstruction	Yeast biomass	Neosartorya fischeri
MODEL1302010040	Pitkanen2014 - Metabolic reconstruction of Neurospora crassa using CoReCo	24516375	2014-03-02	nc	-1	genome scale reconstruction	Yeast biomass	Neurospora crassa
MODEL1302010000	Pitkanen2014 - Metabolic reconstruction of Phaeosphaeria nodorum using CoReCo	24516375	2014-03-02	nc	-1	genome scale reconstruction	Yeast biomass	Phaeosphaeria nodorum
MODEL1302010025	Pitkanen2014 - Metabolic reconstruction of Phanerochaete chrysosporium using CoReCo	24516375	2014-03-02	nc	-1	genome scale reconstruction	Yeast biomass	Phanerochaete chrysosporium
MODEL1302010010	Pitkanen2014 - Metabolic reconstruction of Phycomyces blakesleeanus using CoReCo	24516375	2014-03-02	nc	-1	genome scale reconstruction	Yeast biomass	Phycomyces blakesleeanus
MODEL1302010004	Pitkanen2014 - Metabolic reconstruction of Pichia guilliermondii using CoReCo	24516375	2014-03-02	nc	-1	genome scale reconstruction	Yeast biomass	Pichia guilliermondii
MODEL1302010048	Pitkanen2014 - Metabolic reconstruction of Pichia pastoris using CoReCo	24516375	2014-03-02	nc	-1	genome scale reconstruction	Yeast biomass	Pichia pastoris
MODEL1302010043	Pitkanen2014 - Metabolic reconstruction of Pichia stipitis using CoReCo	24516375	2014-03-02	nc	-1	genome scale reconstruction	Yeast biomass	Pichia stipitis
MODEL1302010032	Pitkanen2014 - Metabolic reconstruction of Postia placenta using CoReCo	24516375	2014-03-02	nc	-1	genome scale reconstruction	Yeast biomass	Postia placenta
MODEL1302010045	Pitkanen2014 - Metabolic reconstruction of Puccinia graminis using CoReCo	24516375	2014-03-02	nc	-1	genome scale reconstruction	Yeast biomass	Puccinia graminis
MODEL1302010018	Pitkanen2014 - Metabolic reconstruction of Rhizopus oryzae using CoReCo	24516375	2014-03-02	nc	-1	genome scale reconstruction	Yeast biomass	Rhizopus oryzae
MODEL1302010029	Pitkanen2014 - Metabolic reconstruction of Saccharomyces cerevisiae using CoReCo	24516375	2014-03-02	nc	-1	genome scale reconstruction	Yeast biomass	Saccharomyces cerevisiae
MODEL1302010021	Pitkanen2014 - Metabolic reconstruction of Schizosaccharomyces japonicus using CoReCo	24516375	2014-03-02	nc	-1	genome scale reconstruction	Yeast biomass	Schizosaccharomyces japonicus
MODEL1302010035	Pitkanen2014 - Metabolic reconstruction of Schizosaccharomyces pombe using CoReCo	24516375	2014-03-02	nc	-1	genome scale reconstruction	Yeast biomass	Schizosaccharomyces pombe
MODEL1302010034	Pitkanen2014 - Metabolic reconstruction of Sclerotinia sclerotiorum using CoReCo	24516375	2014-03-02	nc	-1	genome scale reconstruction	Yeast biomass	Sclerotinia sclerotiorum
MODEL1302010036	Pitkanen2014 - Metabolic reconstruction of Sporobolomyces roseus using CoReCo	24516375	2014-03-02	nc	-1	genome scale reconstruction	Yeast biomass	Sporobolomyces roseus
MODEL1302010019	Pitkanen2014 - Metabolic reconstruction of Trichoderma reesei using CoReCo	24516375	2014-03-02	nc	-1	genome scale reconstruction	Yeast biomass	Trichoderma reesei
MODEL1302010044	Pitkanen2014 - Metabolic reconstruction of Uncinocarpus reesii using CoReCo	24516375	2014-03-02	nc	-1	genome scale reconstruction	Yeast biomass	Uncinocarpus reesii
MODEL1302010016	Pitkanen2014 - Metabolic reconstruction of Ustilago maydis using CoReCo	24516375	2014-03-02	nc	-1	genome scale reconstruction	Yeast biomass	Ustilago maydis
MODEL1302010013	Pitkanen2014 - Metabolic reconstruction of Yarrowia lipolytica using CoReCo	24516375	2014-03-02	nc	-1	genome scale reconstruction	Yeast biomass	Yarrowia lipolytica
BIOMD0000000469	Smallbone2013 - E.coli metabolic model with linlog rate law	10.1089/ind.2013.0003	2014-04-04		-1	Genome/large scale ODE model with own biomass function		E.coli
BIOMD0000000470	Smallbone2013 - E.coli metabolic model with modular rate law	10.1089/ind.2013.0003	2013-11-05		-1	Genome/large scale ODE model with own biomass function	biomass from underlying GSM	E.coli
MODEL1001200000	Smallbone2010_Genome_Scale_Yeast_Kinetics	20109182	2013-06-13	nc	-1	Genome/large scale ODE model with own biomass function		Yeast
BIOMD0000000496	Stanford2013 - Kinetic model of yeast metabolic network (standard)	24324546	2014-04-04		-1	Genome/large scale ODE model with own biomass function		Yeast
BIOMD0000000497	Stanford2013 - Kinetic model of yeast metabolic network (regulation)	24324546	2014-04-04		-1	Genome/large scale ODE model with own biomass function		Yeast
BIOMD0000000471	Smallbone2013 - Yeast metabolic model with linlog rate law	10.1089/ind.2013.0003	2014-04-29		-1	Genome/large scale ODE model with own biomass function		Yeast
BIOMD0000000472	Smallbone2013 - Yeast metabolic model with modular rate law	10.1089/ind.2013.0003	2014-04-29		-1	Genome/large scale ODE model with own biomass function		Yeast
BIOMD0000000473	Smallbone2013 - Yeast metabolic model with modular rate law, merged with Pritchard 2002	10.1089/ind.2013.0003	2014-04-29		-1	Genome/large scale ODE model with own biomass function		Yeast
BIOMD0000000353	Nag2011_ChloroplasticStarchDegradation	21682905	2014-04-01		0	constant external mets, no biomass	plants and green algea	Arabidopsis thaliana, Chlorella protothecoides?
MODEL1106160000	Smith2011_HumanHeartMitochondrian_MetabolicModel	21714867	2011-07-18	nc	0	constraint based model	no biomass	Human mitochondria
BIOMD0000000091	Proctor2005 - Actions of chaperones and their role in ageing	15610770	2014-06-03		0	no biomass	heat shock & protein misfolding model	Eukaryote
BIOMD0000000105	Proctor2007 - Age related decline of proteolysis, ubiquitin-proteome system	17408507	2014-08-11		0	no biomass	protein degradation rather than metabolic pathway part	Eukaryote
MODEL1006230010	Cloutier2009_EnergyMetabolism_ModelA	19828503	2010-06-25	nc	0	no biomass	dummy energy demand reaction, different scenarios	generic
MODEL1006230016	Cloutier2009_EnergyMetabolism_ModelB	19828503	2010-06-25	nc	0	no biomass	dummy energy demand reaction, different scenarios	generic
MODEL1006230059	Cloutier2009_EnergyMetabolism_ModelE	19828503	2010-06-25	nc	0	no biomass	dummy energy demand reaction, different scenarios	generic
MODEL1006230068	Cloutier2009_EnergyMetabolism_ModelC	19828503	2010-06-25	nc	0	no biomass	dummy energy demand reaction, different scenarios	generic
MODEL1006230095	Cloutier2009_EnergyMetabolism_ModelD	19828503	2010-06-25	nc	0	no biomass	dummy energy demand reaction, different scenarios	generic
MODEL1006230096	Cloutier2009_EnergyMetabolism_ModelF	19828503	2010-06-25	nc	0	no biomass	dummy energy demand reaction, different scenarios	generic
BIOMD0000000050	Martins2003_AmadoriDegradation	12873422	2014-04-04		0	no biomass	chemical model (amadori reaction?)	generic
BIOMD0000000053	Ferreira2003_CML_generation2	12911334	2014-10-09		0	no biomass	in vitro model	generic
MODEL1006230019	Brown1997_PlasmaMelatoninLevels	9124558	2010-06-25	nc	0	no biomass	PK model.	Human
BIOMD0000000434	McAuley2012 - Whole-body Cholesterol Metabolism	23046614	2014-10-09		0	no biomass	whole body model, no molecular reactions, could potentially be enhanced by tissue specific mdoels	Human
MODEL1006230041	Cloutier2009_BrainEnergyMetabolism	19396534	2010-06-25	nc	0	no biomass	multicellular model, dummy ATP consumer	Human brain
MODEL1103210001	Jamshidi01_RBC_MetabolicNetwork	11294796	2012-02-03	nc	0	no biomass	fixed external metabolite concentrations	human erythrocytes
MODEL1007200000	Nijhout2006_Hepatic_Folate_Metab	17150100	2010-09-24	nc	0	no biomass	fixed external metabolite concentrations	Human hepatocytes
BIOMD0000000285	Tang2010_PolyGlutamate	20885783	2014-06-03		0	no biomass	proteasome model	Mammals
BIOMD0000000041	Kongas2007 - Creatine Kinase in energy metabolic signaling in muscle	10.1038/npre.2007.1317.1	2014-10-10		0	no biomass	reaction diffusion model, rates based on data (static), reaction “out of equlibrium”	Oryctolagus
BIOMD0000000392	Arnold2011_Laisk2006_CalvinCycle_Starch_Sucrose	22001849	2012-04-20		0	no biomass	fixed species	plants
BIOMD0000000393	Arnold2011_Zhu2007_CalvinCycle_Starch_Sucrose_Photorespiration	22001849	2012-04-20		0	no biomass	fixed species	plants
BIOMD0000000245	Lei2001_Yeast_Aerobic_Metabolism	11434967	2010-06-03		0	no biomass	uptake rates fitted to data	Yeast
MODEL1009220000	Martins2004_Yeast_Glycolysis_GlycerolSynthesis	10.2174/1389202043348643	2012-02-03	nc	0	no biomass	fixed external metabolite concentrations	Yeast
BIOMD0000000254	Bier2000_GlycolyticOscillation	10692299	2010-09-15		0	no biomass	Constant inflow, dummy ATP consumption	Yeast
BIOMD0000000291	Nikolaev2005_AlbuminBilirubinAdsorption	16307060	2014-10-10		0	no biomass function, no context	mechanistic model f surface binding	Eukaryote
BIOMD0000000504	Proctor2013 - Cartilage breakdown, interventions to reduce collagen release	24285357	2014-10-10		0	no biomass function, no context	more regulatory	Human
BIOMD0000000244	Kotte2010_Ecoli_Metabolic_Adaption	20212527	2014-04-04		0	no Biomass nothing from intermediates	regulatory model	E.coli
BIOMD0000000172	Pritchard2002_glycolysis	12180966	2014-05-27		0	no Biomass nothing from intermediates	modified from teusink2000	Yeast7
BIOMD0000000042	Nielsen1998_Glycolysis	17029704	2014-03-26		0	no biomass, cell free extract	oscillations	Yeast
BIOMD0000000459	Liebal2012 - B.subtilis post-transcriptional instability model	22511268	2014-04-04		0	no biomass, no context	transcriptional model	B. subtilis
BIOMD0000000461	Liebal2012 - B.subtilis transcription inhibition model	22511268	2014-05-30		0	no biomass, no context	transcriptional model	B. subtilis
BIOMD0000000231	Valero2006_Adenine_TernaryCycle	16884499	2012-03-09		0	no biomass, no context	minimal model	B. taurus
BIOMD0000000284	Hofmeyer1986_SeqFb_Proc_AA_Synthesis	3450367	2012-07-05		0	no biomass, no context	minimal model	Bacteria
BIOMD0000000457	Firczuk2013 - Eukaryotic mRNA translation machinery	23340841	2013-06-21		0	no biomass, no context	transcription initiation model	Eukaryote
MODEL1006230039	Lemon2003_Ca2Dynamics	12782119	2010-06-25	nc	0	no biomass, no context	Ca-Signalling model	Eukaryote
MODEL1108260010	Jesty1993_ProteolyticPositiveFeedback	8512937	2011-08-26	nc	0	no biomass, no context	toy model	generic
BIOMD0000000337	Pfeiffer2001_ATP-ProducingPathways_CooperationCompetition	11283355	2012-04-20		0	no biomass, no context	toy model	generic
BIOMD0000000258	Ortega2006_bistability_doublePhosphorylation	16934033	2012-04-20		0	no biomass, no context	toy/minimal model	generic
BIOMD0000000199	Santolini2001_nNOS_Mechanism_Regulation	11038356	2012-05-16		0	no biomass, no context	minimal model	generic
BIOMD0000000092	Fuentes2005_ZymogenActivation	15634334	2014-02-13		0	no biomass, no context	Toy model, isolated model	generic
MODEL0568648427	Kervizic2008_Cholesterol_SREBP	19025648	2009-02-26	nc	0	no biomass, no context	boolean model	Human
BIOMD0000000292	Rovers1995_Photsynthetic_Oscillations	7772723	2012-07-11		0	no biomass, no context	minimal model	Plants
MODEL1308080002	Koch2005 - sucrose breakdown pathway - petri net	15546934	2013-09-10	nc	0	no biomass, no context	Petri net	Solanum tuberosum
MODEL6624199343	Martins2001_glyoxalase	11453985	2008-09-10	nc	0	no biomass, no context	Single enzyme model	Yeast
MODEL1012110001	Li2010_YeastGlycolysis	21114840	2012-02-03	nc	0	no biomass, no context		Yeast
BIOMD0000000076	Cronwright2002_Glycerol_Synthesis	12200299	2012-05-16		0	no biomass, no context	minimal model, fixed concentrations	Yeast
BIOMD0000000015	Curto1998 - purine metabolism	9664759	2014-07-02		0	no biomass, SS according to clinical measurements (concentrations and fluxes )		ReconX
BIOMD0000000023	Rohwer2001_Sucrose	11513743	2012-05-20		0	no biomass,no context	minimal model	sugar cane
BIOMD0000000046	Olsen2003_peroxidase	12823550	2014-02-12		0	no context	single enzyme reaction model	Armoracia rusticana
BIOMD0000000062	Bhartiya2003_Tryptophan_operon	12787031	2014-02-12		0	no context	gene expression model	E.coli
BIOMD0000000485	Cao2013 - Application of ABSIS method in the bistable Schlögl model	23862966	2014-04-04		0	no context	toy model	generic
BIOMD0000000486	Cao2013 - Application of ABSIS method in the reversible isomerization model	23862966	2014-04-04		0	no context	toy model	generic
BIOMD0000000052	Brands2002 - Monosaccharide-casein systems	12405768	2014-04-04		1	a bit of context, no exact stoichiometry.	maillard reaction	generic
BIOMD0000000268	Reed2008_Glutathione_Metabolism	18442411	2014-10-10		1	compund exchnage based on exp rates, not for intermediates	CPSok	Human hepatocytes
BIOMD0000000510	Kerkhoven2013 - Glycolysis and Pentose Phosphate Pathway in T.brucei - MODEL C (with glucosomal ribokinase)	24339766	2014-03-05		1	fixed stoichiometry drain, no intermediates	based on Achcar2012	T.brucei
BIOMD0000000511	Kerkhoven2013 - Glycolysis and Pentose Phosphate Pathway in T.brucei - MODEL D (with ATP:ADP antiporter)	24339766	2014-03-05		1	fixed stoichiometry drain, no intermediates	based on Achcar2012	T.brucei
BIOMD0000000513	Kerkhoven2013 - Glycolysis in T.brucei - MODEL A	24339766	2014-03-05		1	fixed stoichiometry drain, no intermediates	based on Achcar2012	T.brucei
BIOMD0000000514	Kerkhoven2013 - Glycolysis and Pentose Phosphate Pathway in T.brucei - MODEL B	24339766	2014-03-05		1	fixed stoichiometry drain, no intermediates	based on Achcar2012	T.brucei
BIOMD0000000515	Kerkhoven2013 - Glycolysis and Pentose Phosphate Pathway in T.brucei - MODEL C in fructose medium (with glucosomal ribokinase)	24339766	2014-03-05		1	fixed stoichiometry drain, no intermediates	based on Achcar2012	T.brucei
BIOMD0000000516	Kerkhoven2013 - Glycolysis and Pentose Phosphate Pathway in T.brucei - MODEL D in fructose medium (with ATP:ADP antiporter)	24339766	2014-04-28		1	fixed stoichiometry drain, no intermediates	based on Achcar2012	T.brucei
MODEL1403250002	Rao2014 - Yeast glycolysis (reduced model)	24885656	2014-09-03	nc	1	fixed stoichiometry drain, no intermediates	reduced from teusink 2000	Yeast
MODEL1403250001	vanEunen2012 - Yeast Glycolysis (glucose upshift)	22570597	2014-09-03	nc	1	fixed stoichiometry drain, no intermediates		Yeast7
BIOMD0000000106	Yang2007_ArachidonicAcid	17381237	2014-10-10		1	Fixed values, nothing from intermediate species	CPSok	Human
BIOMD0000000017	Hoefnagel2002_PyruvateBranches	11932446	2014-04-04		1	Leak fluxes based on experimental flux measurements	many lumped reactions!!, L. lactis	L. lactis
BIOMD0000000408	Hettling2011_CreatineKinase	21912519	2014-05-26		1	no Biomass nothing from intermediates	ATP turnover via creatine kinase (mycocardium)	Human cardiomyocytes
BIOMD0000000225	Westermark2003_Pancreatic_GlycOsc_basic	12829470	2014-05-28		1	no Biomass nothing from intermediates	glycolytic oscillations	Human Pancreas
BIOMD0000000236	Westermark2003_Pancreatic_GlycOsc_extended	12829470	2014-06-03		1	no Biomass nothing from intermediates	glycolytic oscillations	Human Pancreas
BIOMD0000000063	Galazzo1990_FermentationPathwayKinetics	10.1016/0141-0229(90)90033-M	2014-04-02		1	no Biomass nothing from intermediates	Yeast, old	Yeast
BIOMD0000000495	Sen2013 - Phospholipid Synthesis in P.knowlesi	24209716	2014-02-28		1	no biomass, external mets constant		P.knowlesi
BIOMD0000000068	Curien2003_MetThr_synthesis	14622248	2012-05-16		1	no biomass, no context	fixed species	A. thaliana
BIOMD0000000212	Curien2009_Aspartate_Metabolism	19455135	2010-12-13		1	no biomass, no context	fixed external metabolite concentrations	A. thaliana
BIOMD0000000222	Singh2006_TCA_Ecoli_glucose	16887020	2010-12-20		1	no biomass, no context	fixed external metabolite concentrations	E.coli
BIOMD0000000458	Smallbone2013 - Serine biosynthesis	23417802	2013-06-10		1	no biomass, no context	fixed species	E.coli
BIOMD0000000217	Bruggeman2005_AmmoniumAssimilation	15819889	2012-08-09		1	no biomass, no context	fixed species, dummy ATP consumer	E.coli
BIOMD0000000232	Nazaret2009_TCA_RC_ATP	19007794	2010-01-22		1	no biomass, no context	fixed influx of pyruvate	Eukaryote
MODEL1006230091	Reed2004_MethionineCycle	14637052	2010-06-25	nc	1	no biomass, no context	constant influx or input function	Human
MODEL1006230005	Chen2006_NitricOxideRelease	16864000	2010-06-25	nc	1	no biomass, no context	fixed external metabolite concentrations	Human
MODEL1006230114	Bertram2006_ATPproduction_Mitochondrial	16945388	2010-06-25	nc	1	no biomass, no context	link to glycolytic reactions, no ATP comsumption	Human
MODEL8236441887	Yang2008_AAnetwork_PMN	18985027	2011-03-03	nc	1	no biomass, no context	fixed external metabolite concentrations	Human
MODEL8236520494	Yang2008_AAnetwork_PLT	18985027	2011-03-03	nc	1	no biomass, no context	fixed external metabolite concentrations	Human
MODEL8236480549	Yang2008_AAnetwork_EC	18985027	2011-03-03	nc	1	no biomass, no context	fixed external metabolite concentrations	Human
MODEL4151491057	Beard2005_Mitochondrial_Respiration	16163394	2012-02-02	nc	1	no biomass, no context	Energy turnover model, dummy cytoplasmic consumer	Human
MODEL1006230027	vanBeek2007_OxPhos_HeartMuscleCells	17581855	2010-06-25	nc	1	no biomass, no context	Energy turnover model, dummy cytoplasmic consumer	Human cardiomyocytes
BIOMD0000000054	Ataullahkhanov1996_Adenylate	8733433	2012-07-05		1	no biomass, no context	fixed external metabolite concentrations	human erythrocytes
MODEL1006230049	Vinnakota2006_MuscleGlycogenolysis_ModelC	16617075	2010-06-25	nc	1	no biomass, no context	Thermodyniamic model	Human muscle
MODEL1006230053	Vinnakota2006_MuscleGlycogenolysis_ModelB	16617075	2010-06-25	nc	1	no biomass, no context	Thermodyniamic model	Human muscle
MODEL1006230077	Vinnakota2006_MuscleGlycogenolysis_ModelA	16617075	2010-06-25	nc	1	no biomass, no context	Thermodyniamic model	Human muscle
MODEL1006230034	Wu2006_ATPsynthesis_SkeletalMuscle	16837647	2010-06-25	nc	1	no biomass, no context	Energy turnover model, dummy cytoplasmic consumer	Human muscle
MODEL1006230100	Vinnakota2010_TranscientAnoia_EDLmuscle	20308252	2010-06-25	nc	1	no biomass, no context	Thermodyniamic model,enzyme data in different muscle types	Human muscle
MODEL1006230112	Vinnakotta2010_TranscientAnoxia_SOLmuscle	20308252	2010-06-25	nc	1	no biomass, no context	Thermodyniamic model,enzyme data in different muscle types	Human muscle
MODEL0491251823	Chen2007_NeuronalEndothelialNOS	17320763	2009-04-24	nc	1	no biomass, no context	buffered external concentrations	Human neuronal endothel
BIOMD0000000143	Olsen2003_neutrophil_oscillatory_metabolism	12524266	2014-06-03		1	no biomass, no context	Stress situation	Human neutrophiles
BIOMD0000000219	Singh2006_TCA_mtu_model1	16887020	2010-12-20		1	no biomass, no context	fixed external metabolite concentrations	Mtb
BIOMD0000000383	Arnold2011_Farquhar1980_RuBisCO-CalvinCycle	22001849	2012-04-20		1	no biomass, no context	fixed external metabolite concentrations	plants
BIOMD0000000384	Arnold2011_Medlyn2002_RuBisCO-CalvinCycle	22001849	2012-04-20		1	no biomass, no context	fixed external metabolite concentrations	plants
BIOMD0000000385	Arnold2011_Schultz2003_RuBisCO-CalvinCycle	22001849	2012-04-20		1	no biomass, no context	fixed external metabolite concentrations	plants
BIOMD0000000386	Arnold2011_Sharkey2007_RuBisCO-CalvinCycle	22001849	2012-04-20		1	no biomass, no context	fixed external metabolite concentrations	plants
BIOMD0000000387	Arnold2011_Damour2007_RuBisCO-CalvinCycle	22001849	2012-04-20		1	no biomass, no context	fixed external metabolite concentrations	plants
BIOMD0000000013	Poolman2004_CalvinCycle	15073223	2012-05-16		1	no biomass, no context	fixed external metabolite concentrations	plants
MODEL5952308332	Danø2006_Glycolysis_Reduction	17010168	2009-09-23	nc	1	no biomass, no context	reduced from Hynnet al.	Yeast
BIOMD0000000253	Teusink1998_Glycolysis_TurboDesign	9612078	2010-12-02		1	no biomass, no context	fixed external metabolite concentrations	Yeast
MODEL1011010000	Bruck2008_Glycolysis	19425118	2012-02-03	nc	1	no biomass, no context	based on teusink 2000	Yeast
BIOMD0000000247	Ralser2007_Carbohydrate_Rerouting_ROS	18154684	2014-02-14		1	no biomass, no context	based on tesink glycolysis	Yeast 7
BIOMD0000000213	Nijhout2004_Folate_Cycle	15496403	2014-04-01		1	no biomass, nothing from intermediates	fixed species	Human
BIOMD0000000281	Chance1960_Glycolysis_Respiration	13692276	2011-03-16		1	no biomass, nothing from intermediates	storage compounds (buffers)	Human
MODEL6623617994	Lambeth2002_Glycogenolysis	12220081	2011-03-30	nc	1	no biomass, nothing from intermediates	dummy ATP consumer, fixed external metabolite concentrations	Human
BIOMD0000000389	Arnold2011_Hahn1986_CalvinCycle_Starch_Sucrose	22001849	2012-04-20		1	no biomass, nothing from intermediates	fixed external metabolite concentrations	plants
BIOMD0000000390	Arnold2011_Giersch1990_CalvinCycle	22001849	2012-04-20		1	no biomass, nothing from intermediates	fixed external metabolite concentrations	plants
BIOMD0000000505	vanEunen2013 - Network dynamics of fatty acid ?-oxidation (steady-state model)	23966849	2014-03-04		1	no biomass, nothing from intermediates	isolated mitochondria	Rat liver
BIOMD0000000506	vanEunen2013 - Network dynamics of fatty acid ?-oxidation (time-course model)	23966849	2014-03-04		1	no biomass, nothing from intermediates	isolated mitochondria	Rat liver
BIOMD0000000071	Bakker2001_Glycolysis	11415442	2014-05-24		1	no biomass, nothing from intermediates		T.brucei
BIOMD0000000211	Albert2005_Glycolysis	15955817	2014-05-28		1	no biomass, nothing from intermediates		T.brucei
BIOMD0000000428	Achcar2012 - Glycolysis in bloodstream form T. brucei	22379410	2014-09-03		1	no biomass, nothing from intermediates		T.brucei
MODEL2426780967	Conant2007_glycolysis_2A	17667951	2010-09-28	nc	1	no biomass, nothing from intermediates	based on Teusink 2000	Yeast
MODEL2427021978	Conant2007_glycolysis_3A	17667951	2010-09-28	nc	1	no biomass, nothing from intermediates	population model	Yeast
BIOMD0000000064	Teusink2000_Glycolysis	10951190	2012-07-19		1	no biomass, nothing from intermediates		Yeast
BIOMD0000000061	Hynne2001_Glycolysis	11744196	2013-06-03		1	no biomass, nothing from intermediates	fixed external metabolite concentrations	Yeast
MODEL1006230022	Wolf2000_AnaerobicGlycolysis	10702114	2011-03-16	nc	1	no biomass, nothing from intermediates	fixed influx og glucose	Yeast
MODEL1101100000	Bakker1997_Glycolysis	9013556	2011-06-23	nc	1	no biomass, nothing from intermediates	kinetic glc uptake, fixed external conc.	Yeast
BIOMD0000000206	Wolf2000_Glycolytic_Oscillations	10692304	2012-07-05		1	no biomass, nothing from intermediates	dummy ATP consumer, fixed external metabolite concentrations	Yeast
MODEL0995500644	Rodriguez2005_denovo_pyrimidine_biosynthesis	15784266	2009-10-07	nc	1	no biomass, sinks	fixed ATP	E.coli
BIOMD0000000018	Morrison1989_FolateCycle	2732237	2012-07-05		1	no biomass, sinks	fixed species	Human breast cancer
BIOMD0000000191	Montañez2008_Arginine_catabolism	17520329	2012-07-05		1	no biomass, sinks	fixed external metabolite concentrations	Human endothel
BIOMD0000000070	Holzhutter2004_Erythrocyte_Metabolism	15233787	2012-05-16		1	no biomass, sinks	fixed external metabolite concentrations	human erythrocytes
MODEL1305060000	Reyes-Palomares2012 - a combined model hepatic polyamine and sulfur aminoacid metabolism - version1	21814788	2013-05-09	nc	1	no biomass, sinks	fixed species	human hepatocytes
BIOMD0000000190	Rodriguez-Caso2006_Polyamine_Metabolism	16709566	2012-07-05		1	no biomass, sinks	minimal model	Mammals
BIOMD0000000436	Gupta2009 - Eicosanoid Metabolism	19486676	2012-12-14		1	no biomass, sinks	fixed external metabolite concentrations	Mammals
MODEL1303130001	Venkatraman2011 - PLS-UPA behaviour in the presence of substrate competition	22004735	2013-03-26	nc	1	no biomass, sinks		Mammals
MODEL1204240000	Sorokina2011_StarchMetabolism_Ostreococcus	21352558	2012-08-10	nc	1	no biomass, sinks		Ostreococcus
BIOMD0000000388	Arnold2011_Zhu2009_CalvinCycle	22001849	2012-04-20		1	no biomass, sinks	ATP/ADP fixed	plants
BIOMD0000000391	Arnold2011_Poolman2000_CalvinCycle_Starch	22001849	2012-04-20		1	no biomass, sinks	NADP/H fixed	plants
BIOMD0000000090	Wolf2001_Respiratory_Oscillations	11423122	2012-07-05		1	no biomass, sinks	fixed stoichiometry/rate	Yeast
BIOMD0000000176	Conant2007_WGD_glycolysis_2A3AB	17667951	2012-05-16		1	no biomass, sinks	fixed external metabolite concentrations, dummy ATP consumer	Yeasts
BIOMD0000000177	Conant2007_glycolysis_2C	17667951	2012-05-16		1	no biomass, sinks	fixed external metabolite concentrations, dummy ATP consumer	Yeasts
BIOMD0000000380	Smallbone2011_TrehaloseBiosynthesis	21943906	2012-05-16		1	no biomass,no context	fixed species	Yeast
MODEL1004070000	Haut1974_Pentose_Cycle_Rat	4154746	2012-02-02	nc	1	no biomass/no context	fixed external metabolite concentrations	Rat
BIOMD0000000450	Reyes-Palomares2012 - a combined model hepatic polyamine and sulfur aminoacid metabolism - version2	21814788	2014-04-04		1	no context, nothing from intermediates	Constant input of amino acids, Hepatic cells	Human liver
BIOMD0000000075	Xu2003 - Phosphoinositide turnover	12771127	2014-05-24		1	no context, nothing from intermediates	basal production rate, neuroblastoma cells	mus musculus
BIOMD0000000415	Mellor2012_LipooxygenasePathway	21535565	2014-05-22		1	no context, nothing from intermediates		Soybean
MODEL1310160000	Stavrum2013 - Tryptophan Metabolism in Liver	24129579	2014-02-26	nc	1	no stoichiometrically exact biomass, some context		Human hepatocytes
MODEL1303260000	Smallbone2013 - Glycolysis in S.cerevisiae - Iteration 00	23831062	2013-06-25	nc	1	nothing from intermediates		Yeast
MODEL1303260001	Smallbone2013 - Glycolysis in S.cerevisiae - Iteration 01	23831062	2013-06-25	nc	1	nothing from intermediates		Yeast
MODEL1303260002	Smallbone2013 - Glycolysis in S.cerevisiae - Iteration 02	23831062	2013-06-25	nc	1	nothing from intermediates		Yeast
MODEL1303260003	Smallbone2013 - Glycolysis in S.cerevisiae - Iteration 03	23831062	2013-06-25	nc	1	nothing from intermediates		Yeast
MODEL1303260004	Smallbone2013 - Glycolysis in S.cerevisiae - Iteration 04	23831062	2013-06-25	nc	1	nothing from intermediates		Yeast
MODEL1303260005	Smallbone2013 - Glycolysis in S.cerevisiae - Iteration 05	23831062	2013-06-25	nc	1	nothing from intermediates		Yeast
MODEL1303260006	Smallbone2013 - Glycolysis in S.cerevisiae - Iteration 06	23831062	2013-06-25	nc	1	nothing from intermediates		Yeast
MODEL1303260007	Smallbone2013 - Glycolysis in S.cerevisiae - Iteration 07	23831062	2013-06-25	nc	1	nothing from intermediates		Yeast
MODEL1303260008	Smallbone2013 - Glycolysis in S.cerevisiae - Iteration 08	23831062	2013-06-25	nc	1	nothing from intermediates		Yeast
MODEL1303260009	Smallbone2013 - Glycolysis in S.cerevisiae - Iteration 09	23831062	2013-06-25	nc	1	nothing from intermediates		Yeast
MODEL1303260010	Smallbone2013 - Glycolysis in S.cerevisiae - Iteration 10	23831062	2013-06-25	nc	1	nothing from intermediates		Yeast
MODEL1303260011	Smallbone2013 - Glycolysis in S.cerevisiae - Iteration 11	23831062	2013-06-25	nc	1	nothing from intermediates		Yeast
MODEL1303260012	Smallbone2013 - Glycolysis in S.cerevisiae - Iteration 12	23831062	2013-06-25	nc	1	nothing from intermediates		Yeast
MODEL1303260013	Smallbone2013 - Glycolysis in S.cerevisiae - Iteration 13	23831062	2013-06-25	nc	1	nothing from intermediates		Yeast
MODEL1303260014	Smallbone2013 - Glycolysis in S.cerevisiae - Iteration 14	23831062	2013-06-25	nc	1	nothing from intermediates		Yeast
MODEL1303260015	Smallbone2013 - Glycolysis in S.cerevisiae - Iteration 15	23831062	2013-06-25	nc	1	nothing from intermediates		Yeast
MODEL1303260016	Smallbone2013 - Glycolysis in S.cerevisiae - Iteration 16	23831062	2013-06-25	nc	1	nothing from intermediates		Yeast
MODEL1303260017	Smallbone2013 - Glycolysis in S.cerevisiae - Iteration 17	23831062	2013-06-25	nc	1	nothing from intermediates	fixed species, dummy ATP consumer	Yeast
MODEL1303260018	Smallbone2013 - Glycolysis in S.cerevisiae - Iteration 18	23831062	2013-06-25	nc	1	nothing from intermediates		Yeast 7
BIOMD0000000066	Chassagnole2001_Threonine Synthesis	11368770	2012-05-16		1	protein biomass	dummy NADPH consumer	E.coli
BIOMD0000000051	Chassagnole2002_Carbon_Metabolism	17590932	2012-08-01		2	biomass and leaks from intermediates included	but arbitrary stoichiometries	Ecoli
MODEL1004070001	Vaseghi1999_Pentose_PP_yeast	10935926	2012-02-03	nc	2	biomass for AA	some fixed metabolite concentrations	Yeast
BIOMD0000000221	Singh2006_TCA_Ecoli_acetate	16887020	2012-07-05		2	biomass from AKG, nothing from intermediates	arbitrary rate	Ecoli, exp fluxes!
BIOMD0000000218	Singh2006_TCA_mtu_model2	16887020	2012-07-05		2	biomass from AKG, nothing from intermediates	arbitrary rate	Mtb
MODEL6624091635	Hoefnagel2002_Glycolysis	12241048	2006-09-29	nc	2	Cell wall production, nothing from intermediates		L. lactis
BIOMD0000000503	Messiha2013 - combined glycolysis and pentose phosphate pathway model	10.7287/peerj.preprints.146v2	2014-02-28		2	no biomass, generic drain from 2 components	fixed external metabolite concentrations	Yeast
BIOMD0000000502	Messiha2013 - Pentose phosphate pathway model	10.7287/peerj.preprints.146v2	2014-02-28		2	no biomass, generic drain from 2 components	fixed external metabolite concentrations	Yeast 7
MODEL1207300000	Watterson2012_CholesterolBiosynthesisPathway	22664637	2012-08-01	nc	2	no biomass, sinks for all metabolites	?	Human
BIOMD0000000266	Voit2003_Trehalose_Cycle	12782117	2013-06-05		3	drains, different in different contexts	fixed external metabolite concentrations	Yeast
MODEL0318212660	Bhattacharya2011_UreaCycle	https://www.novapublishers.com/catalog/product_info.php?products_id=26885	2012-04-12	nc	4	?		Human
MODEL2784700357	Feala2007_dros_mel_central_metabolism	17437024	2008-09-05	nc	4	Constraint based model		D. melanogaster
MODEL8568434338	Raman2006_MycolicAcid	16261191	2006-09-29	nc	4	constraint based model		Mtb
MODEL1008240001	Çakir2004 - Central Carbon Metabolism of S.cerevisiae	15083505	2013-06-13	nc	4	Constraint based model	own biomass	Yeast
MODEL2021747594	Ma2007_HumanMetabol_wEnergy	17882155	2008-03-19	nc	4	genome scale reconstruction	?	Human
MODEL2021729243	Ma2007_HumanMetabol_woEnergy	17882155	2008-03-19	nc	4	genome scale reconstruction	?	Human
BIOMD0000000460	Liebal2012 - B.subtilis sigB proteolysis model	22511268	2013-06-10		5		gene expression model	B. subtilis
BIOMD0000000315	Montagne2011_Oligator_optimised	21283142	2012-04-20		5		gene expression model	generic
MODEL1112260000	Smith2010_Foxo_PTMs_AgeingRelatedSignallingPathway_A	20567500	2011-12-30	nc	5		Transcriptional/signaling model	Human
MODEL1112260001	Smith2010_Foxo_PTMs_AgeingRelatedSignallingPathway_B	20567500	2011-12-30	nc	5		Transcriptional/signaling model	Human
MODEL1112260002	Smith2010_Foxo_PTMs_AgeingRelatedSignallingPathway_C	20567500	2011-12-30	nc	5		Transcriptional/signaling model	Human
BIOMD0000000489	Sharp2013 - Lipopolysaccharide induced NFkB activation	23936158	2014-03-08		5		Signaling model	Mus musculus
MODEL1107190000	Szappanos2011_GeneticInteractionNetwork_YeastMetabolism	21623372	2011-08-17	nc	5		genetic interaction network	Yeast
MODEL1403250000	Rao2014 - Fatty acid beta-oxidation (reduced model)	24885656	2014-09-03	nc	5		reduced from vanEunen2013	Yeast
MODEL1105180000	Smallbone2009 - FBA model-Geometric Perspective	19490860	2013-06-13	nc	5		Toy model	Yeast

## Sheet: ChosenExamples
BioModels ID	Name	species?	biomass?	how is boundary problem solved?
BIOMD0000000051	Chassagnole2002_Carbon_Metabolism	Ecoli	biomass and leaks from intermediates included	but arbitrary stoichiometries
BIOMD0000000221	Singh2006_TCA_Ecoli_acetate	Ecoli	biomass from AKG, nothing from intermediates	arbitrary rate
MODEL1403250001	vanEunen2012 - Yeast Glycolysis (glucose upshift)	Yeast	fixed stoichiometry drain, no intermediates	fixed external metabolite concentrations
BIOMD0000000061	Hynne2001_Glycolysis	Yeast	no biomass, nothing from intermediates	fixed external metabolite concentrations

## Sheet: BIOMD0000000051
BioModels ID	Name	Publication ID	Last Modified	biomass?	how is boundary problem solved?	species?
BIOMD0000000051	Chassagnole2002_Carbon_Metabolism	17590932	2012-08-01	biomass and leaks from intermediates included	but arbitrary stoichiometries	Ecoli
							Leaks from Backtracking
Species	Annotation	consuming reaction(s)	SS flux (CPS simulation) mmol/s/l	Stoich factor	Leaks orig model		mmol/gDW/h	mmol/L/s				Comments
Extracellular Glucose	C00031, C00293	(Extracellular glucose kinetics).Flux	0.00308347	1	0.00308347	cglcex	0	0				analytical functions for ATP, ADP, AMP, NAD, NADH, NADP, NADPH
Phosphoenol pyruvate	C00074	(Synthesis 1).Flux	0.0144357	-1	-0.068211	cpep	-0.0828938	-0.0129867				glucose pulse, that decays over time.
		(PEP carboxylase).Flux	0.0458844	-1								dilution (degradation) reactions with µ
		(DAHP synthesis).Flux	0.00789088	-1								SS fluxes were estimated using a small scale constraint based model
Glucose-6-Phosphate	C00668				0	cg6p	0	0
Pyruvate	C00022	(Synthesis 2).Flux	0.0535609	-1	-0.238377	cpyr	-1.15924	-0.181614
		(Pyruvate dehydrogenase).Flux	0.188116	-1							Annotations	Kegg/Chebi/EC
		(Methionine synthesis).Flux	0.0022627	1							Organism	E.coli K-12 W3110
		(Tryptophan synthesis).Flux	0.001037	1							Media	glucose limitation
Fructose-6-Phosphate	C05345, C00085	(Mureine synthesis).Flux	0.00043711	-1	-0.00043711	cf6p	-0.0094488	-0.00148031				Component from publication	corresponding uptake in iJO1366	comments
Glucose-1-Phosphate	C00103	(Glucose-1-phosphate adenyltransferase).Flux	0.00267466	-1	-0.00267466	cg1p	0	0				NaSO4	'EX_na1(e)'
6-Phosphogluconate	C00345				0	cpg	-0.605955	-0.0949329					'EX_so4(e)'
Fructose-1,6-bisphosphate	C00354				0	cfdp	0	0				(NH4)SO4	'EX_nh4(e)'
sedoheptulose-7-phosphate	C00281				0	csed7p	-0.0381342	-0.00597436				NH4Cl	'EX_cl(e)'
Glyceraldehyde-3-Phosphate	C00661	(Tryptophan synthesis).Flux	0.001037	1	0.001037	cgap	0.611356	0.0957791				K2HPO4	'EX_k(e)'
Erythrose-4-phosphate	C00279	(DAHP synthesis).Flux	0.00789088	-1	-0.00789088	ce4p	-1.38778e-17	-2.17419e-18					'EX_pi(e)'
Xylulose-5-phosphate	C00231				0	cxyl5p	0	0				NaH2PO4
Ribose-5-phosphate	C00117	(Ribose phosphate pyrophosphokinase).Flux	0.0102886	-1	-0.0102886	crib5p	-0.0933565	-0.0146259				(NH4)2-H-citrate	EX_cit(e)
Dihydroxyacetonephosphate	C00111	(Glycerol-3-phosphate dehydrogenase).Flux	0.00182489	-1	-0.00182489	cdhap	0.0379064	0.00593867				MgSO4	'EX_mg2(e)'
1,3-diphosphosphoglycerate	C00236				0	cpgp	0	0				Thiamine	EX_thm(e)	Default = 0
3-Phosphoglycerate	C00197	(Serine synthesis).Flux	0.0178198	-1	-0.0178198	cpg3	-0.171817	-0.026918				Glucose	'EX_glc(e)'
2-Phosphoglycerate	C00631				0	cpg2	0	0				trace element solution	EX_cbl1(e)	according to standard in iJO1366
Ribulose-5-phosphate	C00199				0	cribu5p	-0.0039804	-0.000623596					EX_cobalt2(e)
Values[catp]					0								EX_cu2(e)
Values[cadp]					0								EX_fe2(e)
Values[camp]					0								EX_fe3(e)
Values[cnadp]					0								EX_mn2(e)
Values[cnadph]					0								EX_mobd(e)
Values[cnad]					0								EX_ni2(e)
Values[cnadh]					0								EX_sel(e)
													EX_slnt(e)
													EX_tungs(e)
													EX_zn2(e)
											Culture conditions	Chemostate with D= 0.1 h^ -1				in GSM
											Measured uptake rates:	Glucose	'EX_glc(e)'	9.2	mmol/L/h	10.13
												Acetate	'EX_ac(e)'	n.d.		0
												Oxygen Uptake	'EX_o2(e)'	24.3	mmol/L/h	24.3
												CO2	'EX_co2(e)'	24.8	mmol/L/h	24.8
Copasi SS simulation results (100000s)
Fluxes
# Time	(Phosphotransferase system).Flux	(Glucose-6-phosphate isomerase).Flux	(Phosphoglucomutase).Flux	(Glucose-6-phosphate dehydrogenase).Flux	(Phosphofructokinase).Flux	(Transaldolase).Flux	(Transketolase a).Flux	(Transketolase b).Flux	(Mureine synthesis).Flux	(Aldolase).Flux	(Glyceraldehyde-3-phosphate dehydrogenase).Flux	(Triosephosphate isomerase).Flux	(Tryptophan synthesis).Flux	(Glycerol-3-phosphate dehydrogenase).Flux	(Phosphoglycerate kinase).Flux	(Serine synthesis).Flux	(Phosphoglycerate mutase).Flux	(Enolase).Flux	(Pyruvate kinase).Flux	(PEP carboxylase).Flux	(Synthesis 1).Flux	(Synthesis 2).Flux	(DAHP synthesis).Flux	(Pyruvate dehydrogenase).Flux	(Methionine synthesis).Flux	(6-Phosphogluconate dehydrogenase).Flux	(Ribose-phosphate isomerase).Flux	(Ribulose-phosphate epimerase).Flux	(Ribose phosphate pyrophosphokinase).Flux	(Glucose-1-phosphate adenyltransferase).Flux	(G6P degradation).Flux	(F6P degradation).Flux	(FDP degradation).Flux	(GAP degradation).Flux	(DHAP degradation).Flux	(PGP degradation).Flux	(PG3 degradation).Flux	(PG2 degradation).Flux	(PEP degradation).Flux	(Ribu5P dilution).Flux	(Rib5P dilution).Flux	(XYL5P dilution).Flux	(SED7P dilution).Flux	(Pyruvate dilution).Flux	(PG dilution).Flux	(E4P dilution).Flux	(GLP dilution).Flux	(Extracellular glucose kinetics).Flux
100000	0.00308347	0.0767615	0.0026918	0.12088	0.146932	0.0394772	0.0394841	0.0315834	0.00043711	0.146923	0.324636	0.145093	0.001037	0.00182489	0.324636	0.0178198	0.306753	0.306741	0.0380263	0.0458844	0.0144357	0.0535609	0.00789088	0.188116	0.0022627	0.120858	0.0497836	0.0710713	0.0102886	0.00267466	9.20367e-05	1.58656e-05	9.34707e-06	6.76956e-06	5.17908e-06	2.40835e-07	6.27692e-05	1.17522e-05	7.86378e-05	3.02382e-06	1.09511e-05	3.82289e-06	6.85014e-06	7.42355e-05	2.20659e-05	2.88324e-06	1.71414e-05	0.00308347
Species
# Time	Extracellular Glucose	Phosphoenol pyruvate	Glucose-6-Phosphate	Pyruvate	Fructose-6-Phosphate	Glucose-1-Phosphate	6-Phosphogluconate	Fructose-1,6-bisphosphate	sedoheptulose-7-phosphate	Glyceraldehyde-3-Phosphate	Erythrose-4-phosphate	Xylulose-5-phosphate	Ribose-5-phosphate	Dihydroxyacetonephosphate	1,3-diphosphosphoglycerate	3-Phosphoglycerate	2-Phosphoglycerate	Ribulose-5-phosphate	Compartments[extracellular]	Compartments[cytosol]	Values[catp]	Values[cadp]	Values[camp]	Values[cnadp]	Values[cnadph]	Values[cnad]	Values[cnadh]
100000	0.0439184	2.8287	3.31067	2.67034	0.570705	0.616596	0.793736	0.336226	0.246408	0.243509	0.103714	0.137514	0.393925	0.186298	0.00866312	2.25788	0.422742	0.10877	1	1	4.26886	0.582	0.123428	0.158998	0.062	1.314	0.0934

## Sheet: BIOMD0000000221
BioModels ID	Name	Publication ID	Last Modified	biomass?	how is boundary problem solved?	species?
BIOMD0000000221	Singh2006_TCA_Ecoli_acetate	16887020	2012-07-05		biomass from AKG, nothing from intermediates	arbitrary rate	Ecoli, exp fluxes!
							Leaks from Backtracking
Species	Annotation	consuming reaction(s)	SS flux (CPS simulation) mmol/min/l	Stoich factor	Leaks orig model mM/s		mmol/g/h	mmol/L/s		Assumptions
cit	C00158				0		0	0		cell weight taken from Chasagnole et al 564 gDW/Lint
icit	C00311				0		0	0							Comments
akg	C00026	Syn	0.208861	-1	-12.5317		-0.118271	-0.0185291						Annotations	Kegg/Chebi/EC
sca	C00091				0		-0.0577346	-0.00904509						Organism	E.coli K-12 W3110
suc	C00042				0		0.0577346	0.00904509						Media	glucose limitation/ acetate limitation
fa	C00122				0		0.114713	0.0179717							Component from publication	corresponding uptake in iJO1366	comments
mal	C00711				0		-1.84453	-0.288977							NaSO4	'EX_na1(e)'
gly	C00048				0		7.359e-05	1.15291e-05								'EX_so4(e)'
															(NH4)SO4	'EX_nh4(e)'
															NH4Cl	'EX_cl(e)'
															K2HPO4	'EX_k(e)'
																'EX_pi(e)'
															NaH2PO4
															(NH4)2-H-citrate	EX_cit(e)
															MgSO4	'EX_mg2(e)'
															Thiamine	EX_thm(e)	Default = 0
															Glucose	'EX_glc(e)'
															trace element solution	EX_cbl1(e)	according to standard in iJO1366
																EX_cobalt2(e)
																EX_cu2(e)
																EX_fe2(e)
																EX_fe3(e)
																EX_mn2(e)
																EX_mobd(e)
																EX_ni2(e)
																EX_sel(e)
																EX_slnt(e)
																EX_tungs(e)
																EX_zn2(e)
														Culture conditions	Chemostate with D= 0.11 h^ -1
														Measured uptake rates:
															Acetate limited:				in GSM
															Acetate	'EX_ac(e)'	7.81	mmol/g/h
															CO2	'EX_co2(e)'	8.76	mmol/g/h
															Glucose limited
															Glucose	'EX_glc(e)'	2.78	mmol/g/h
															CO2	'EX_co2(e)'	5.25	mmol/g/h
															Acetate	'EX_ac(e)'	0.38	mmol/g/h

## Sheet: BIOMD0000000061
	BioModels ID	Name	Publication ID	Last Modified	biomass?	how is boundary problem solved?	species?
	BIOMD0000000061	Hynne2001_Glycolysis	11744196	2013-06-03	no biomass, nothing from intermediates	fixed external metabolite concentrations		Yeast
			SS flux (CPS simulation) mmol/min					Leaks from Backtracking
	Species	consuming reaction(s)	min	max	Stoich factor	Leaks orig model mM/s		mmol/L/s			Assumptions:	1	SS flux was taken to be the mean of maximum and minimum flux during the glycolytic oscillation
1	GlcX						0	0				2	The stoichiometric factor +/- 59 includes the conversion between extracellular and intracellular volumes, This could not be mapped accurately in the backtracking workflow and hence we only show the leak fluxes of the intermediate model species. The Uptake rates of the GSM were set equal to the mean of the oscillatory flux of the Hynne model.
2	Glc	'Glucose uptake'	0.8235	0.84032	59	0.818045		0				3	The growth rate was optimized with the plain Y7 model and the set uptake rates
3	ATP	'ATP consumtion'	6.15042	7.37884	-1	-0.112744		-0.656564
4	G6P	'Storage'	18.0791	23.7335	-1	-0.348438		-0.149896
5	ADP		6.15042	7.37884	1	0.112744		0.444065
6	F6P					0		-0.04341
7	FBP					0		0
8	GAP					0		0.000902392
9	DHAP					0		-0.0682051
10	NAD					0		1.18217
11	BPG					0		0
12	NADH					0		-1.18217
13	PEP					0		-0.0242857
14	Pyr					0		-0.24961
15	ACA					0		-0.805579
16	EtOH					0		0.799868
17	EtOHX	'Ethanol out'	0.80586	0.82099	-59	-0.799868		-0.799868
18	Glyc					0		-0.0570579
19	GlycX	'Glycerol out'	0.07412	0.07595	-59	-0.0737844		0
20	ACAX	'Acetaldehyde out'	0.06755	0.08394	-59	-0.0744826		-0.0744826
21	AMP					0		0.212499

## Sheet: MODEL1403250001
BioModels ID	Name	Publication ID	Last Modified	biomass?	how is boundary problem solved?	species?
MODEL1403250001	vanEunen2012 - Yeast Glycolysis (glucose upshift)	22570597	2014-09-03	fixed stoichiometry drain, no intermediates		Yeast7
											Comments								Mapping by hand
											no annotation provided in SBML file								from Hynne model
							Leaks from Backtracking				“fluxes into side branches fixed, as study is limited to glycolysis only” (Trehalose, Glycerol, Succinate)								Y7 met ID	Idx in Y7 model	Hynne model name	Van Eunen MetIDs
Species	Annotation	consuming reaction(s)	SS flux (CPS simulation) mmol/min/l	Stoich factor	Leaks orig model mM/s		mmol/gDW/h	mmol/L/s											s_0563	435	Glc	Glci	1
Glci		Tre1	0	2	0			0											s_0568	439	G6P	G6P	2
G6P		Tre2	0	-2	0			-0.0462467			Culture conditions	Chemostate with D= 0.1 h^ -1							s_0557	429	F6P	F6P	3
F6P					0			0.0125				respirative conditions							s_0555	427	FBP	F16P	4
F16P					0			0			Measured uptake rates:		from model simulations SS flux						S_0764,s_0629	581485	GAP,DHAP	TRIO	5
TRIO		Gly	17.5	-1	0.291667			-0.254167											s_0075	56	BPG	BPG	6
BPG					0			0					mM/min	mM/h	rxn in GSM	exchanged metabolite	rate in GSM mM/h		s_1198	954	NAD	NAD	7
NAD					0			2.28267				(Glt).Flux	78.1298	1.30216	r_1714	Glucose			s_1203	959	NADH	NADH	8
NADH					0			-2.28267				(Ace).Flux	6.5	0.108333	r_1634	Acetate			s_0188	177		P3G	9
P3G					0			-0.95571				(Adh).Flux	130.46	2.17433	r_1761	Ethanol			s_0260	133		P2G	10
P2G					0			0				(Gly).Flux	17.5	0.291667	r_1808	Glycerol			s_1360	1057	PEP	PEP	11
PEP					0			6.22608e-17											s_1399	1090	Pyr	PYR	12
PYR		Suc	0.9	-2	0.015			0.95571											s_0359	264	ACA	AcAld	13
AcAld		Ace	6.5	-1	-2.28267			-2.28267											s_0565	436	GlcX
		Adh	130.46	-1															s_0434	326	ATP
																			s_0394	290	ADP
																			s_0680	525	EtOH
																			s_0681	526	EtOHX
																			s_0765	582	Glyc
																			s_0766	583	GlycX
Copasi Simulations																			s_0360	265	ACAX
# Time	(Glt).Flux	(Hk).Flux	(Tre1).Flux	(Tre2).Flux	(PGI).Flux	(Pfk).Flux	(Ald).Flux	(Gapdh).Flux	(Gly).Flux	(Pgk).Flux	(Gpm).Flux	(Eno).Flux	(Pyk).Flux	(Pdc).Flux	(Suc).Flux	(Ace).Flux	(Adh).Flux		s_0423	315	AMP
20	78.1298	78.1298	0	0	78.1298	78.1298	78.1298	138.76	17.5	138.76	138.76	138.76	138.76	136.96	0.9	6.5	130.46
